# Supplementary material for: Ecological Stability Emerges at the Level of Strains in the Human Gut Microbiome
Source: PubMed Central journal article supplement (PMC10127601; doi:10.1128/mbio.02502-22), 2023-02-21

# S2 Text

$F_{ST}$ , strain frequency, and strain abundance dynamics plots for all species analyzed, for host *am*. These plots are analogous to Main Text Figure 1. When only a single strain was detected, only  $F_{ST}$  and strain abundance dynamics plots, but no strain frequency plot, is included.

## *Table of Contents*

|                                               |    |
|-----------------------------------------------|----|
| <i>Bacteroides fragilis A</i>                 | 1  |
| <i>Bacteroides ovatus A</i>                   | 2  |
| <i>Bacteroides ovatus B</i>                   | 3  |
| <i>Bacteroides stercoris A</i>                | 4  |
| <i>Bacteroides uniformis A</i>                | 5  |
| <i>Phocaeicola vulgatus A</i>                 | 6  |
| <i>Phocaeicola vulgatus B</i>                 | 7  |
| <i>Phocaeicola vulgatus C</i>                 | 8  |
| <i>Bacteroides xylanisolvens A</i>            | 9  |
| <i>Bacteroides xylanisolvens B</i>            | 10 |
| <i>Barnesiella intenstinihominis A</i>        | 11 |
| <i>Eubacterium rectale A</i>                  | 12 |
| <i>Eubacterium rectale B</i>                  | 13 |
| <i>Faecalibacterium prausnitzii (57453) A</i> | 14 |
| <i>Phascolarctobacterium sp. A</i>            | 15 |
| <i>Parabacteroides merdae A</i>               | 16 |
| <i>Ruminococcus bicirculans A</i>             | 17 |
| <i>Ruminococcus bromii A</i>                  | 18 |

*B. fragilis*

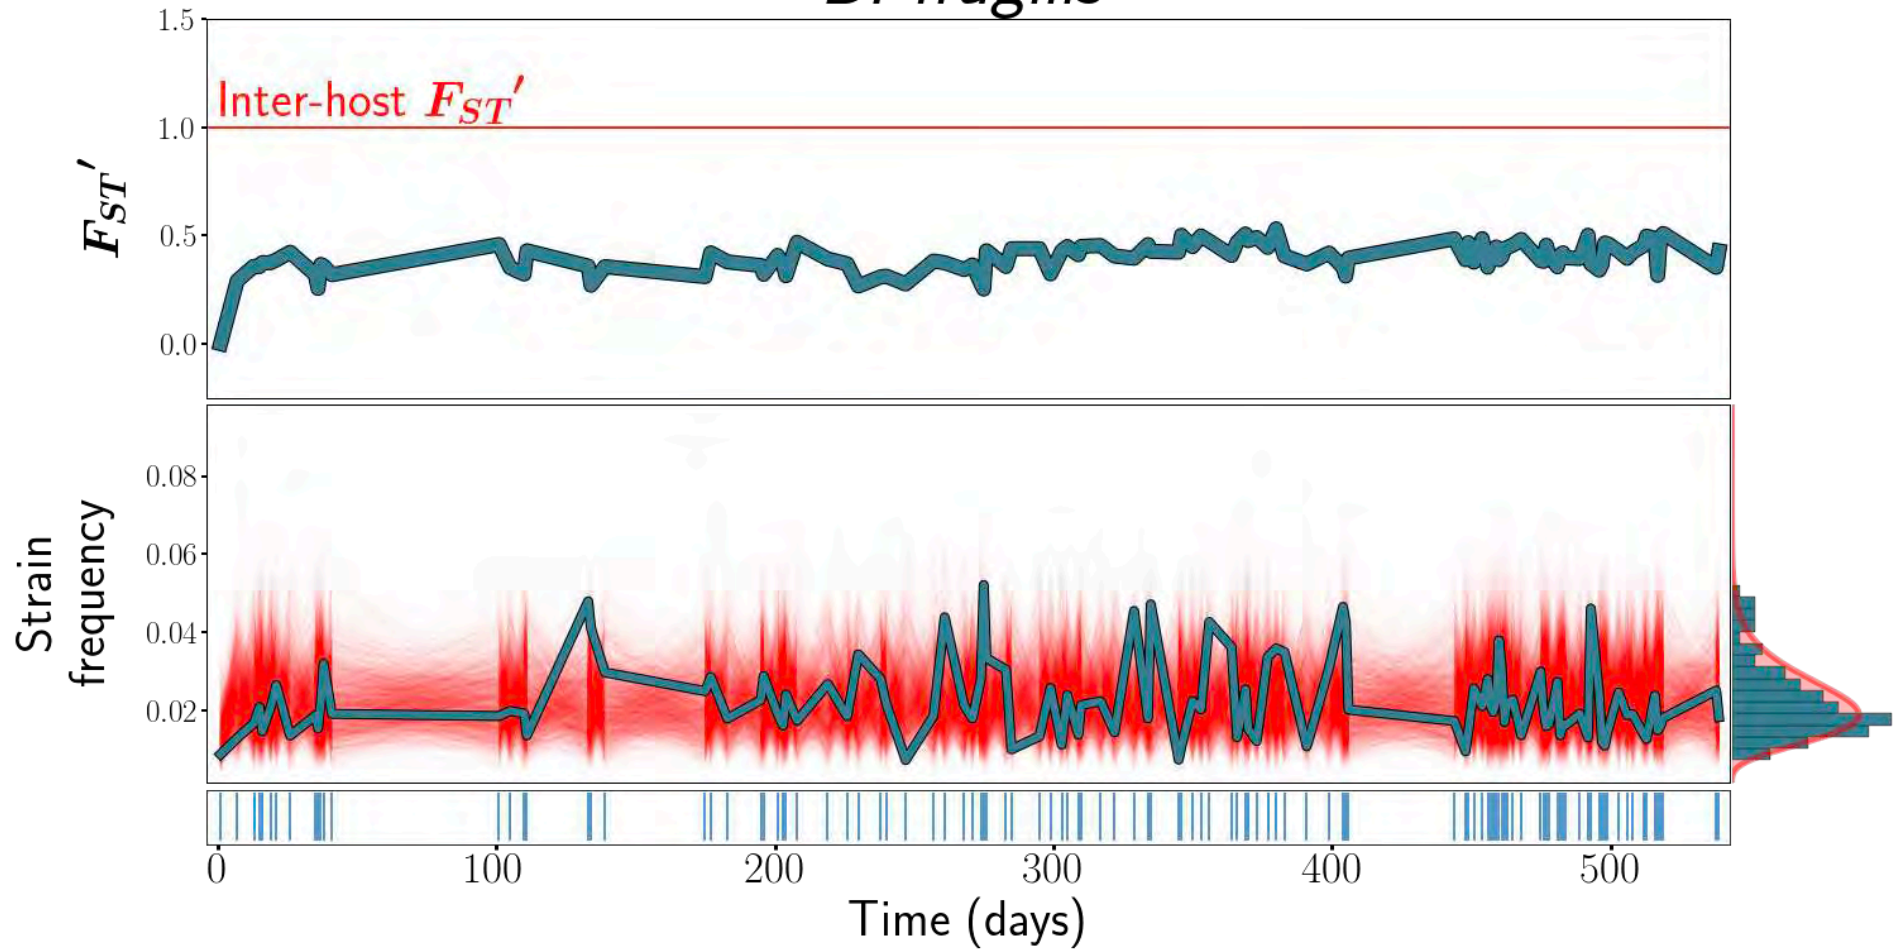

# *B. ovatus*

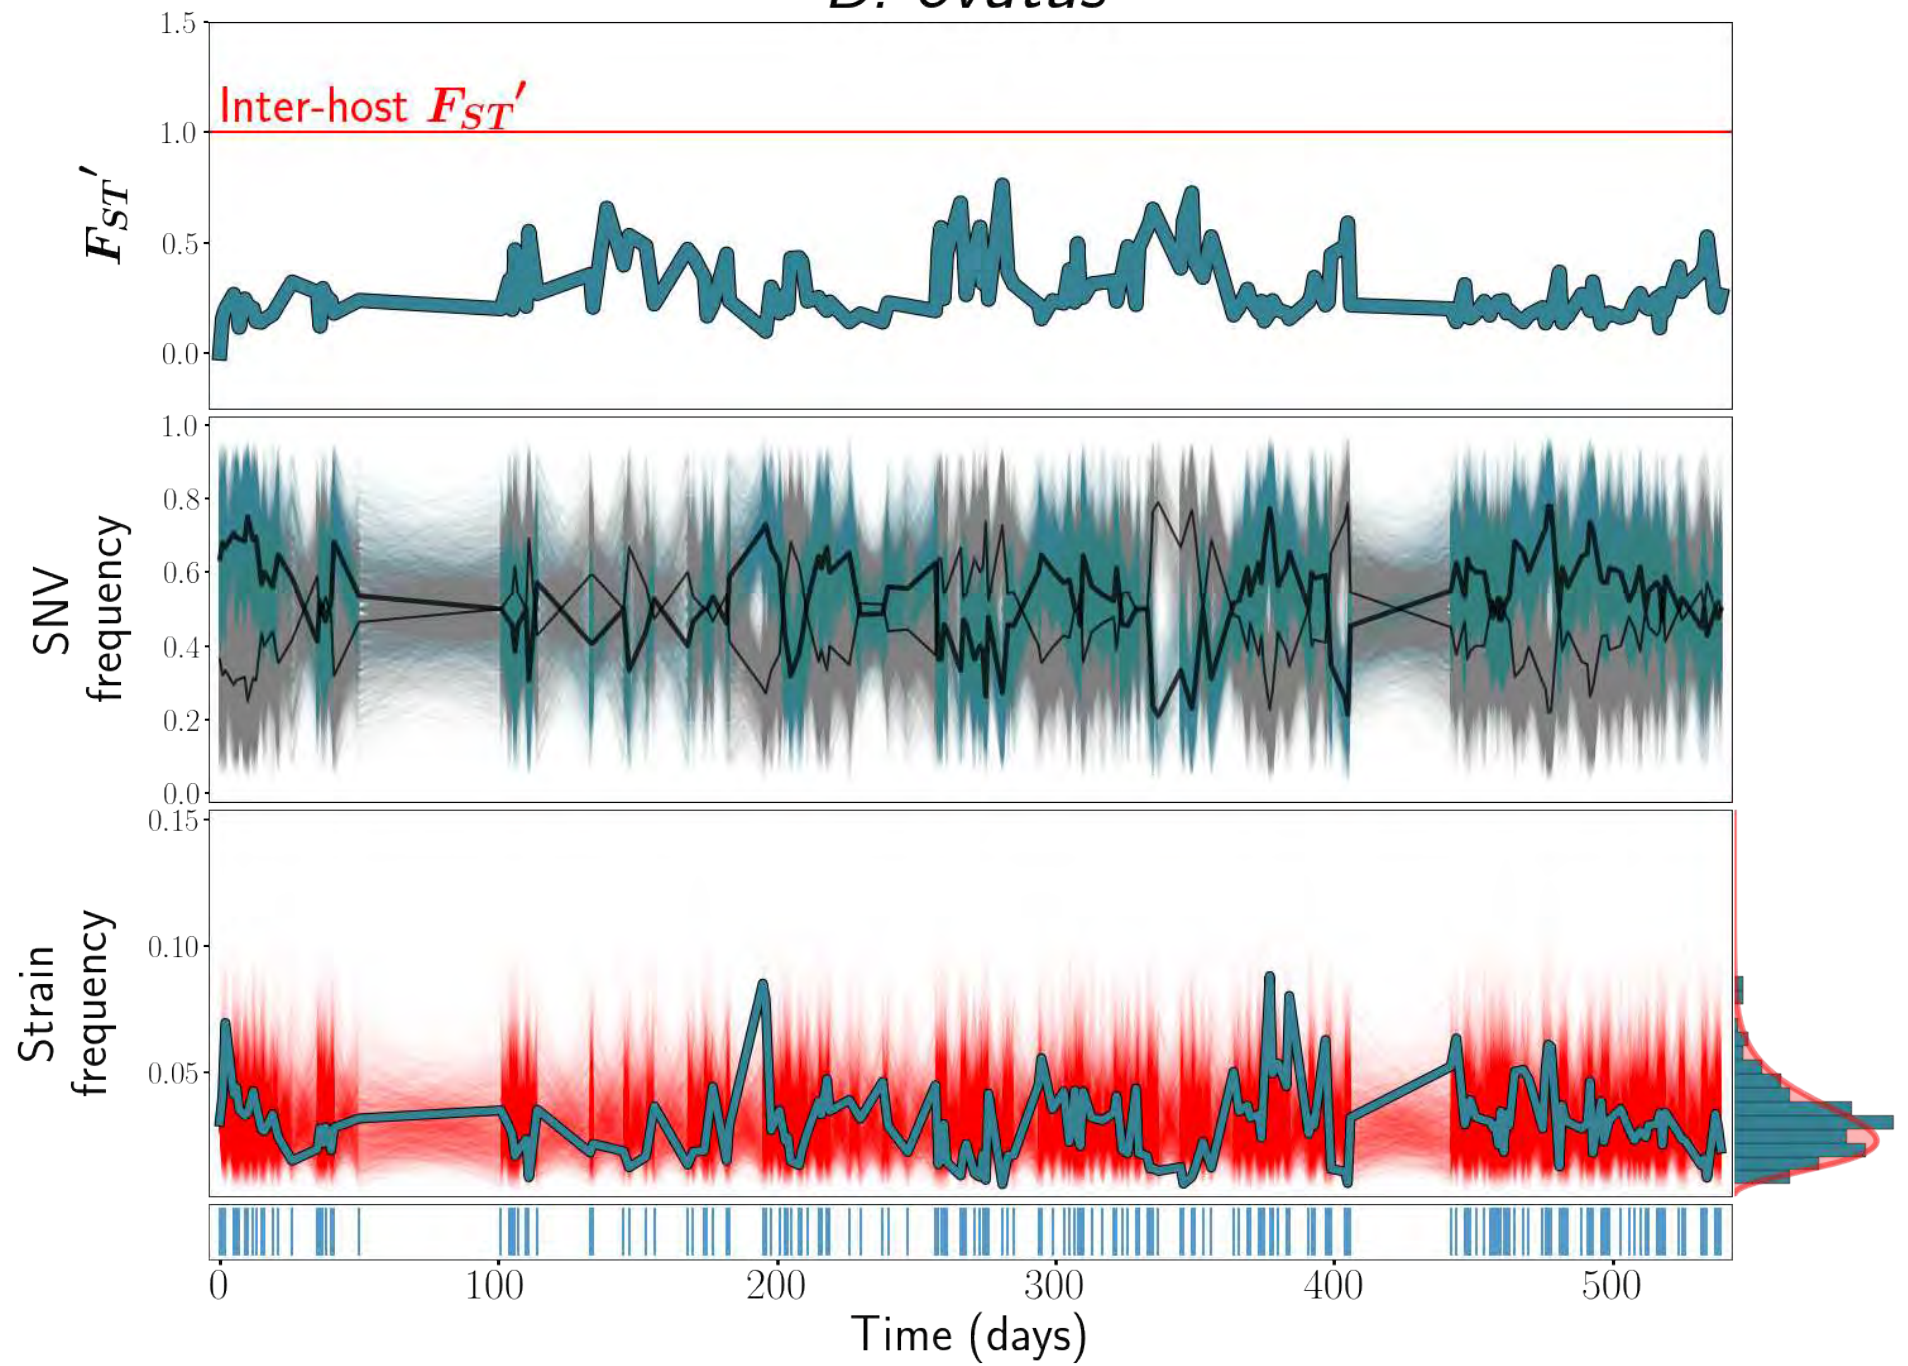

*B. ovatus*

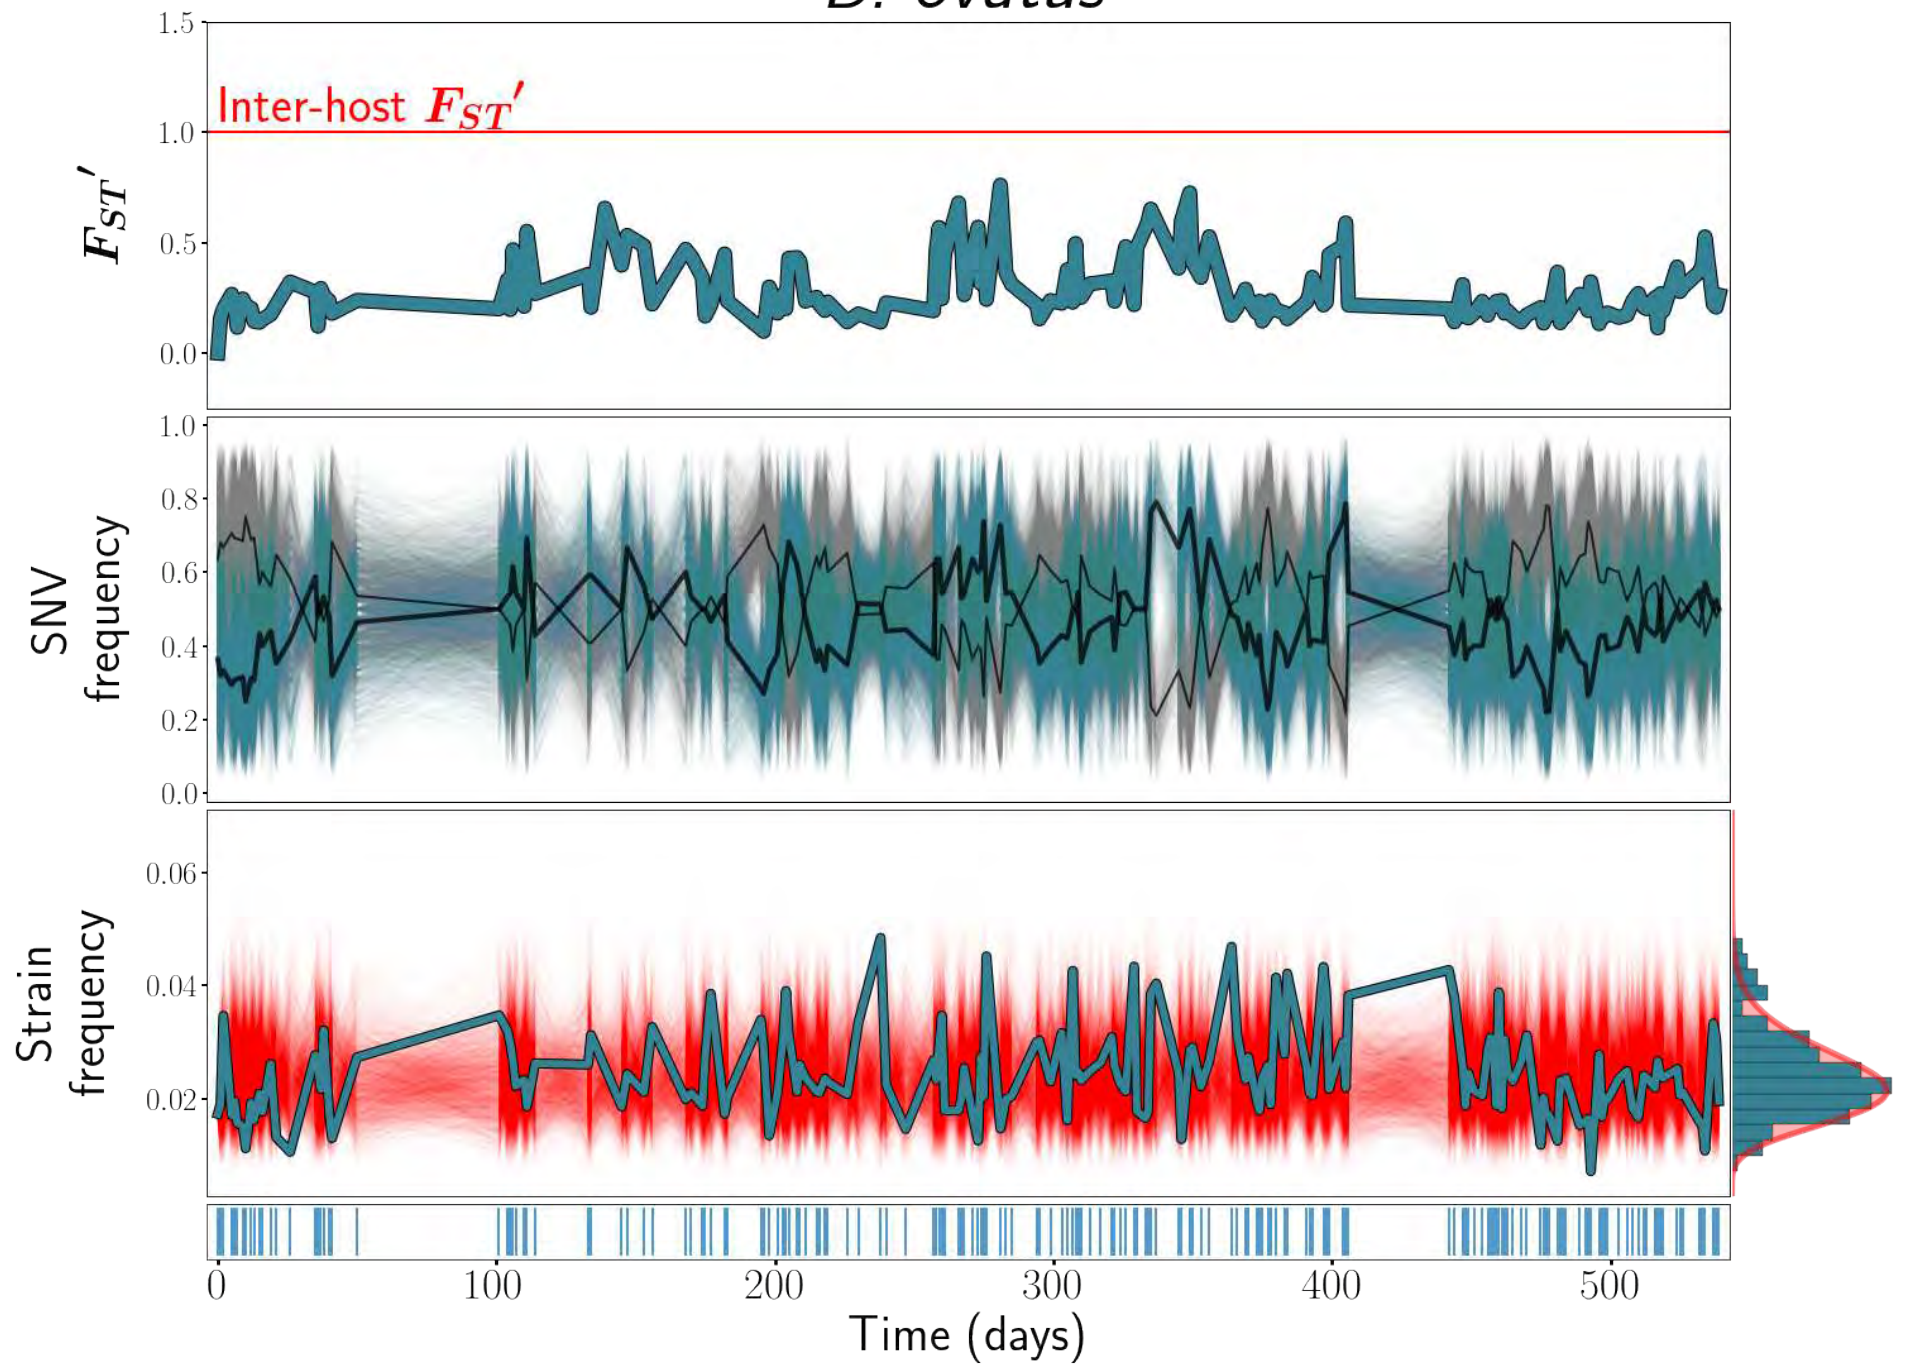

*B. stercoris*

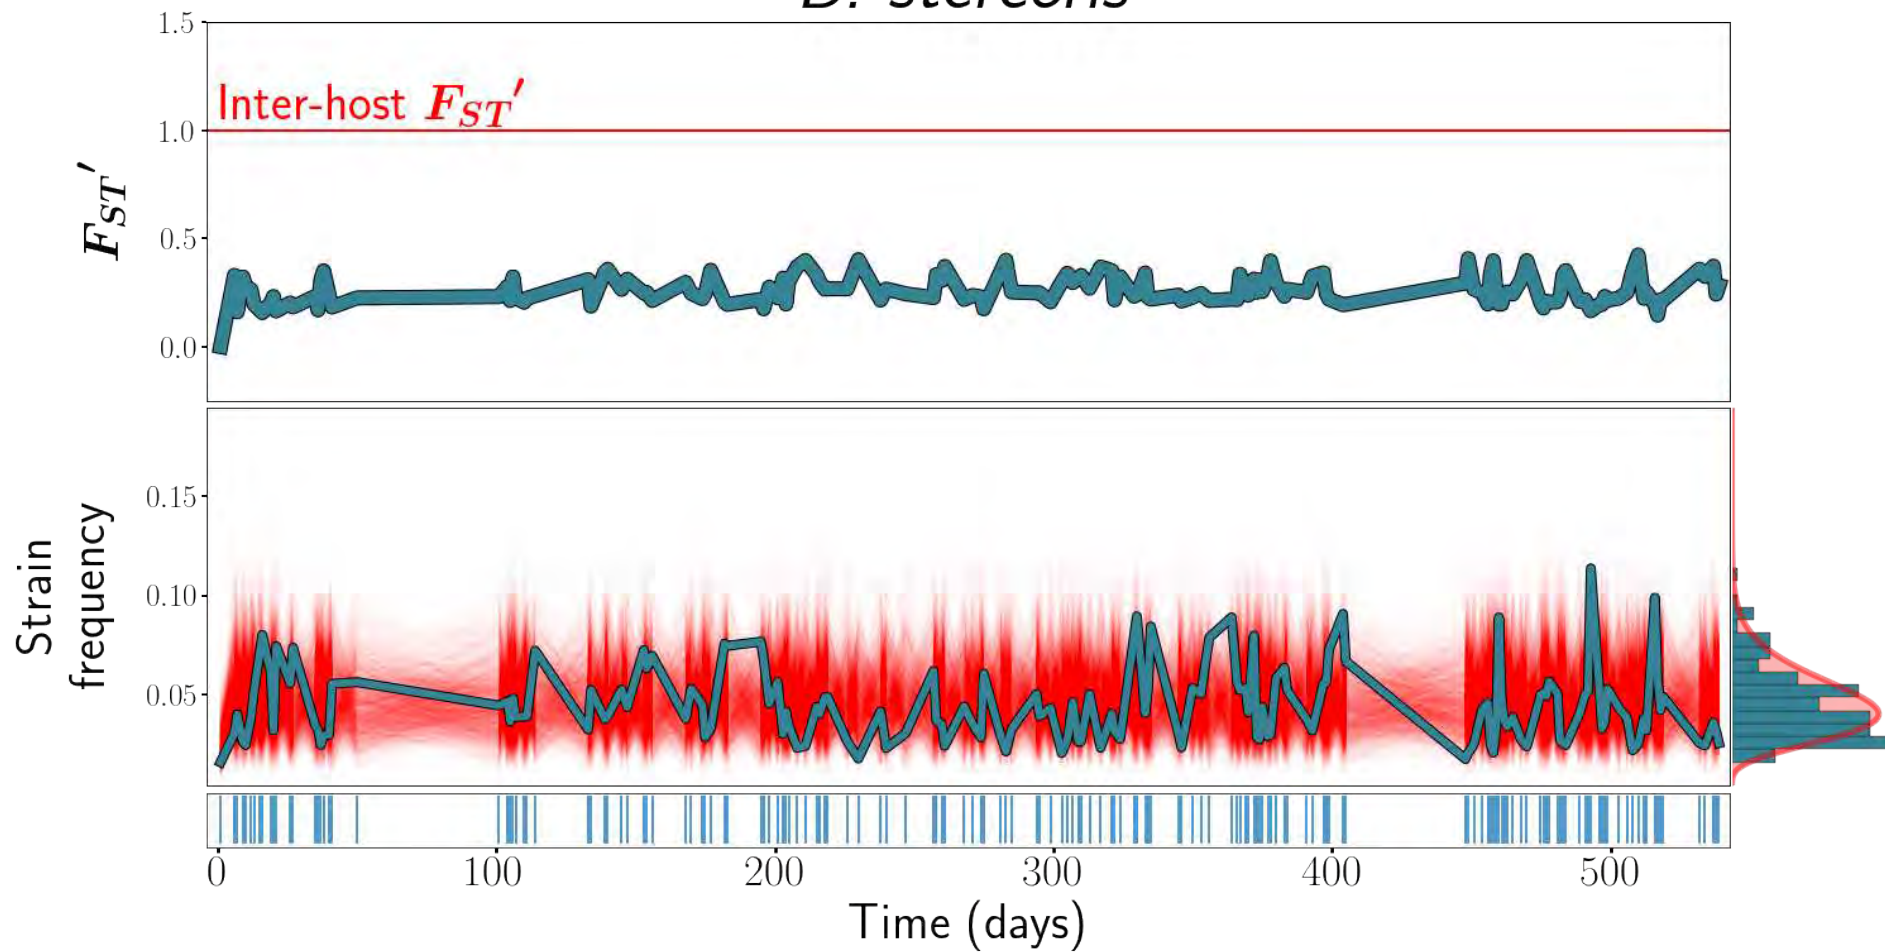

*B. uniformis*

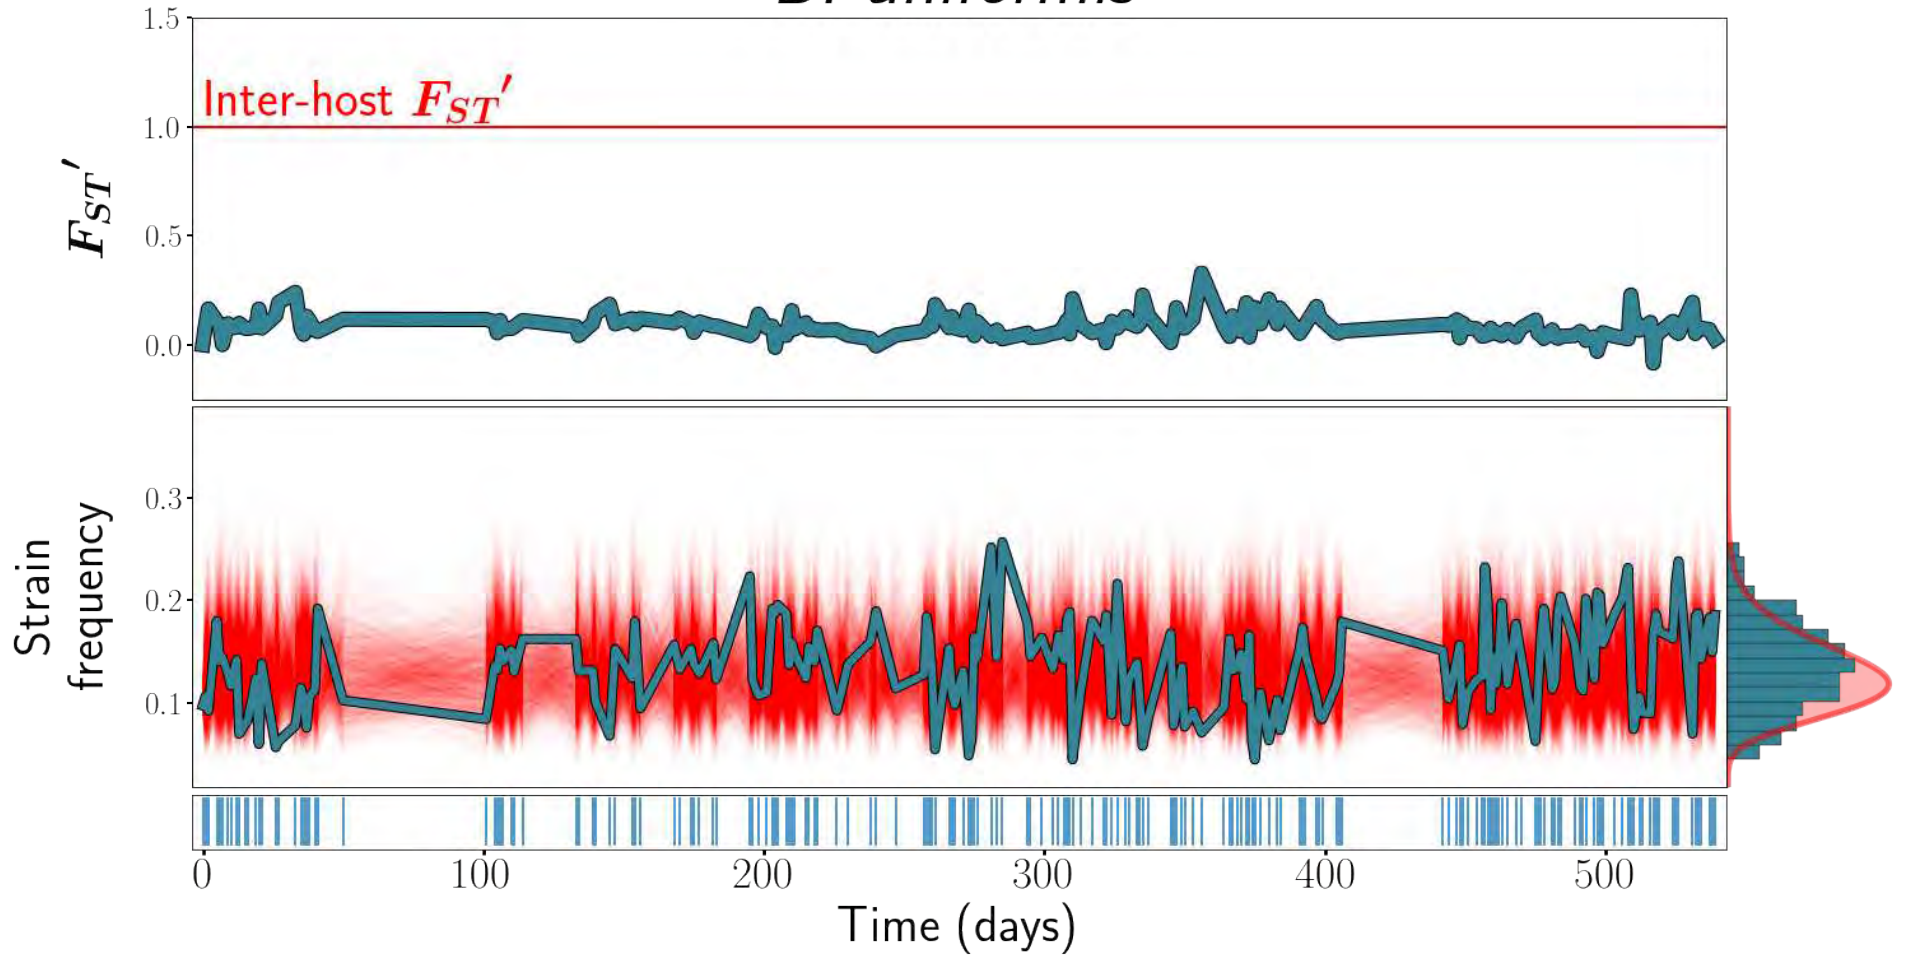

*B. xylanisolvens*

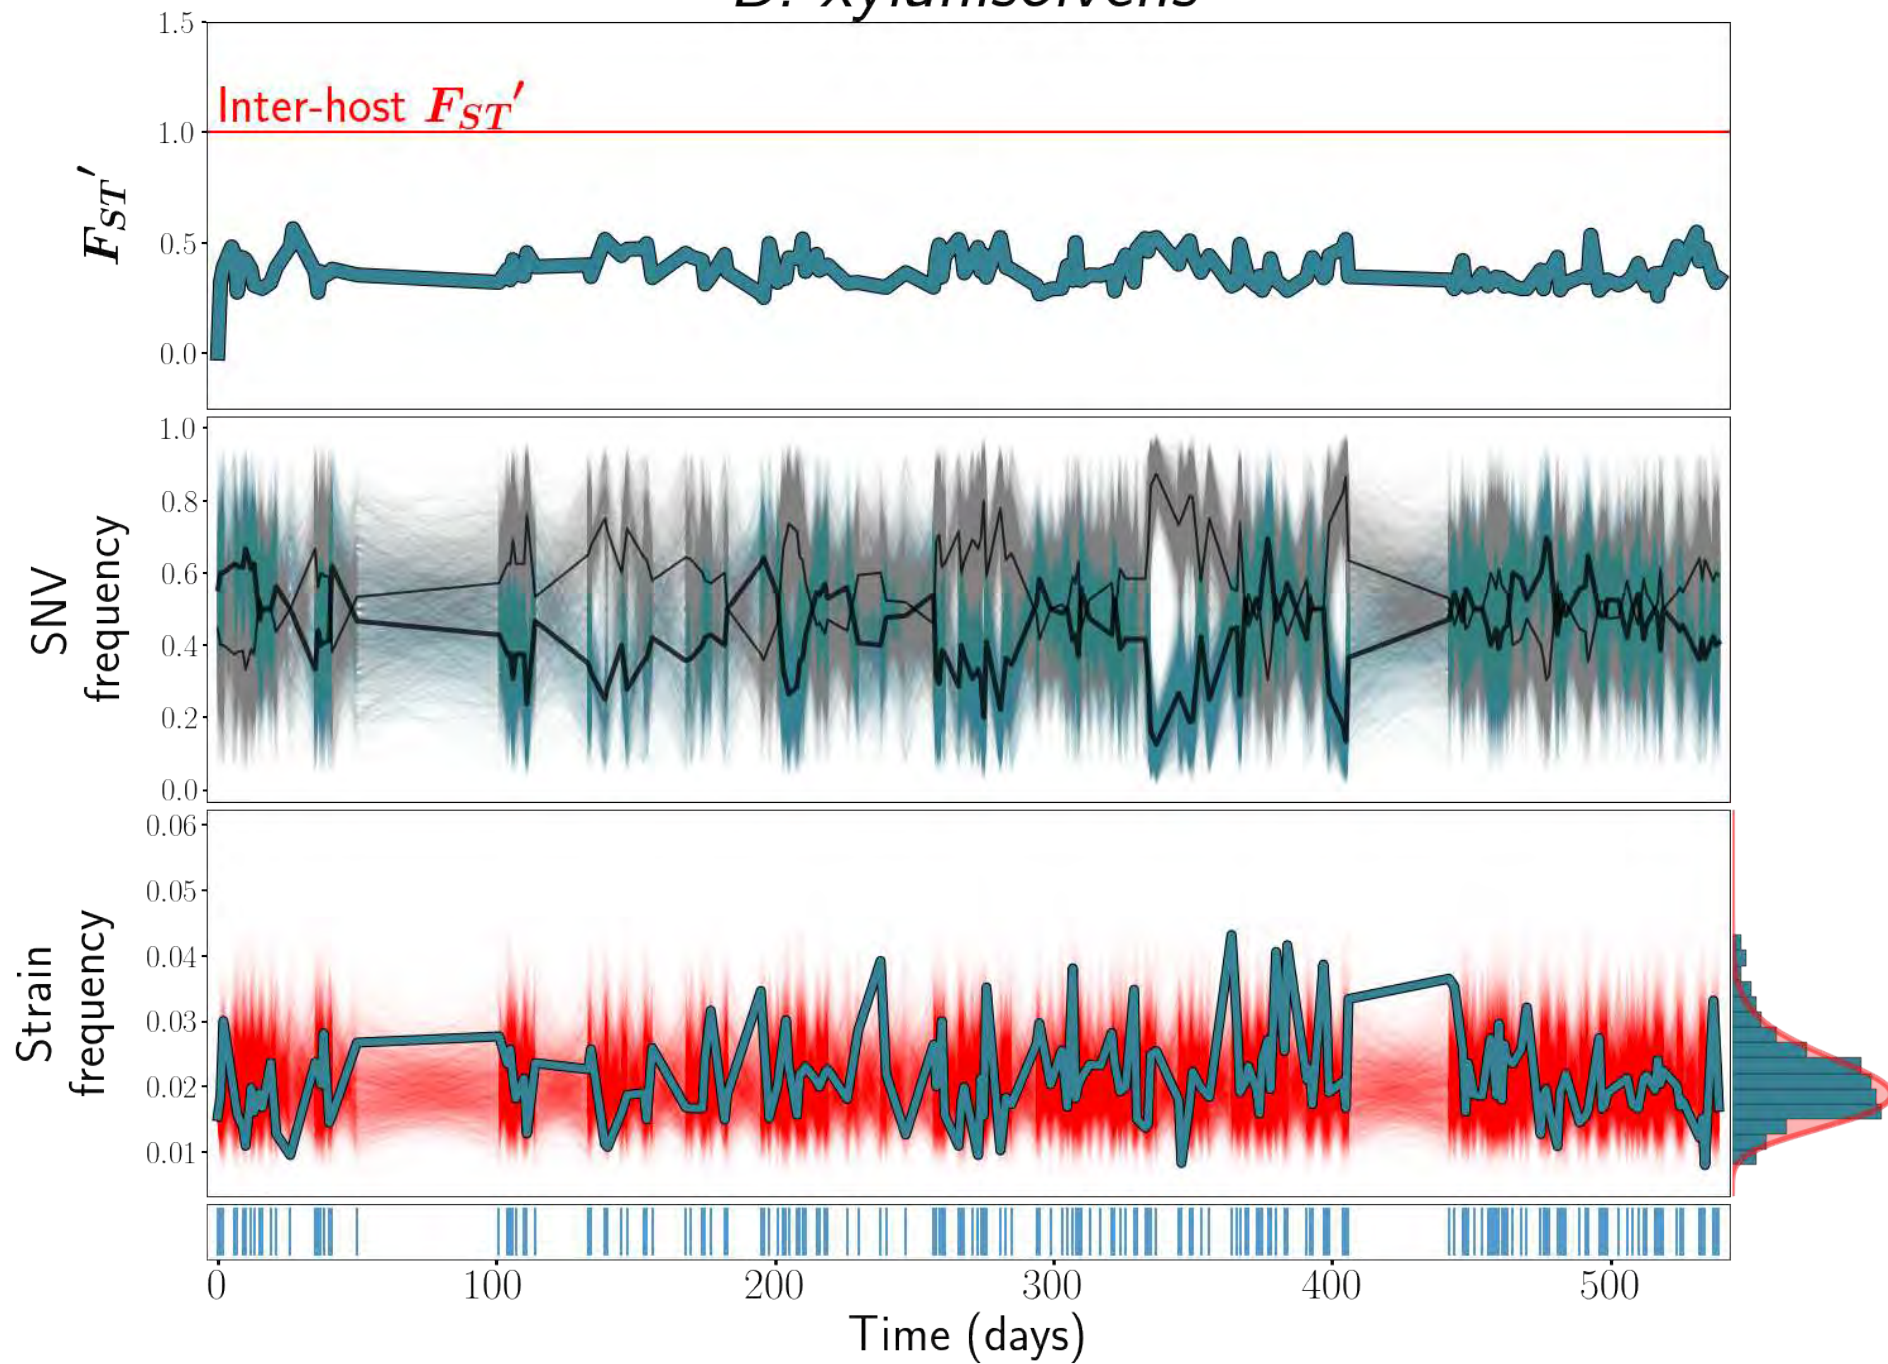

*B. xylanisolvens*

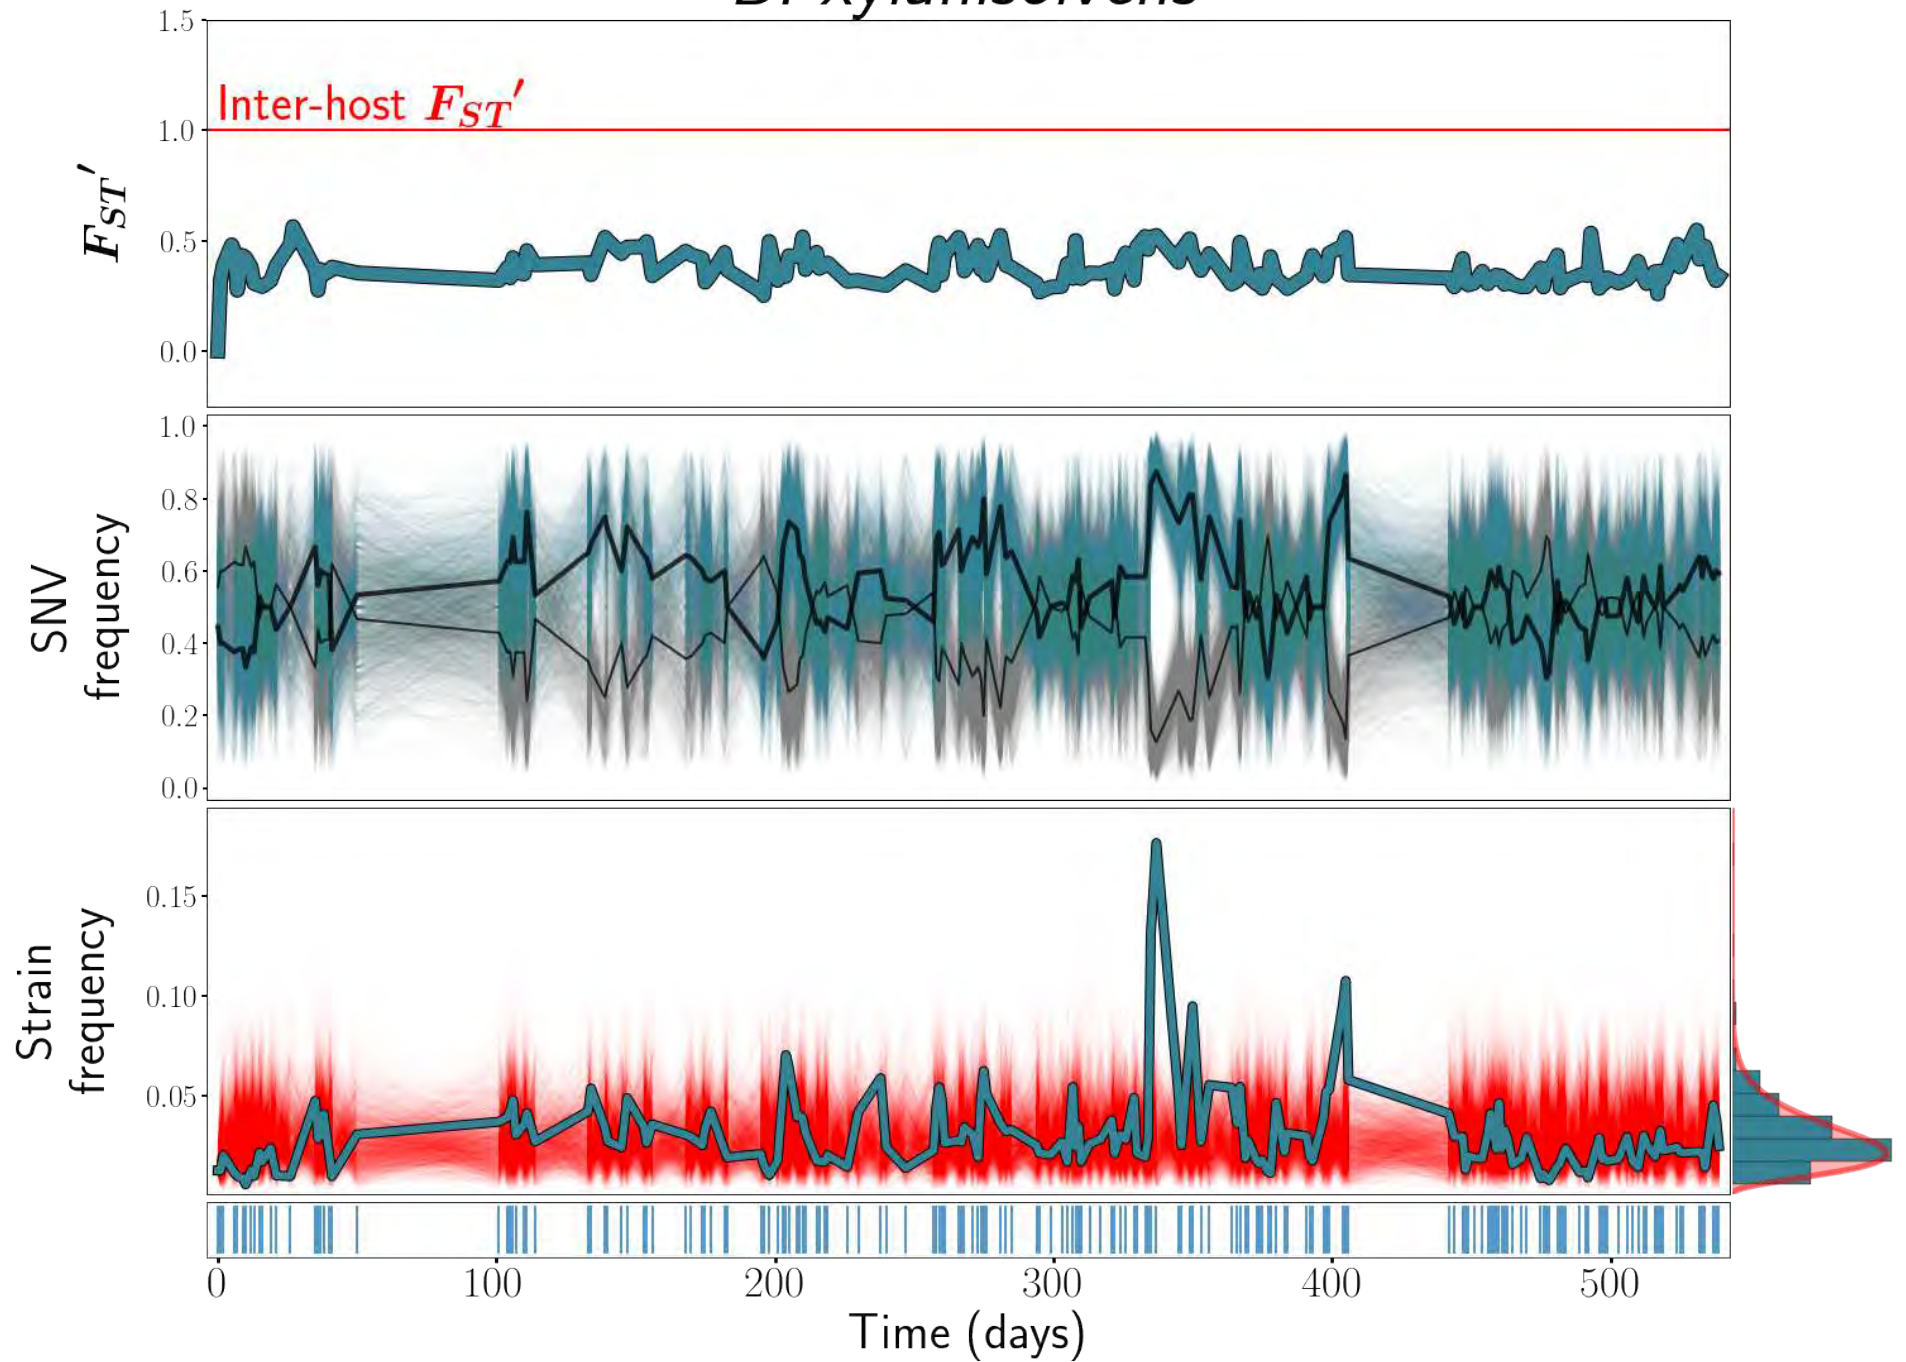



# *B. intestinihominis*

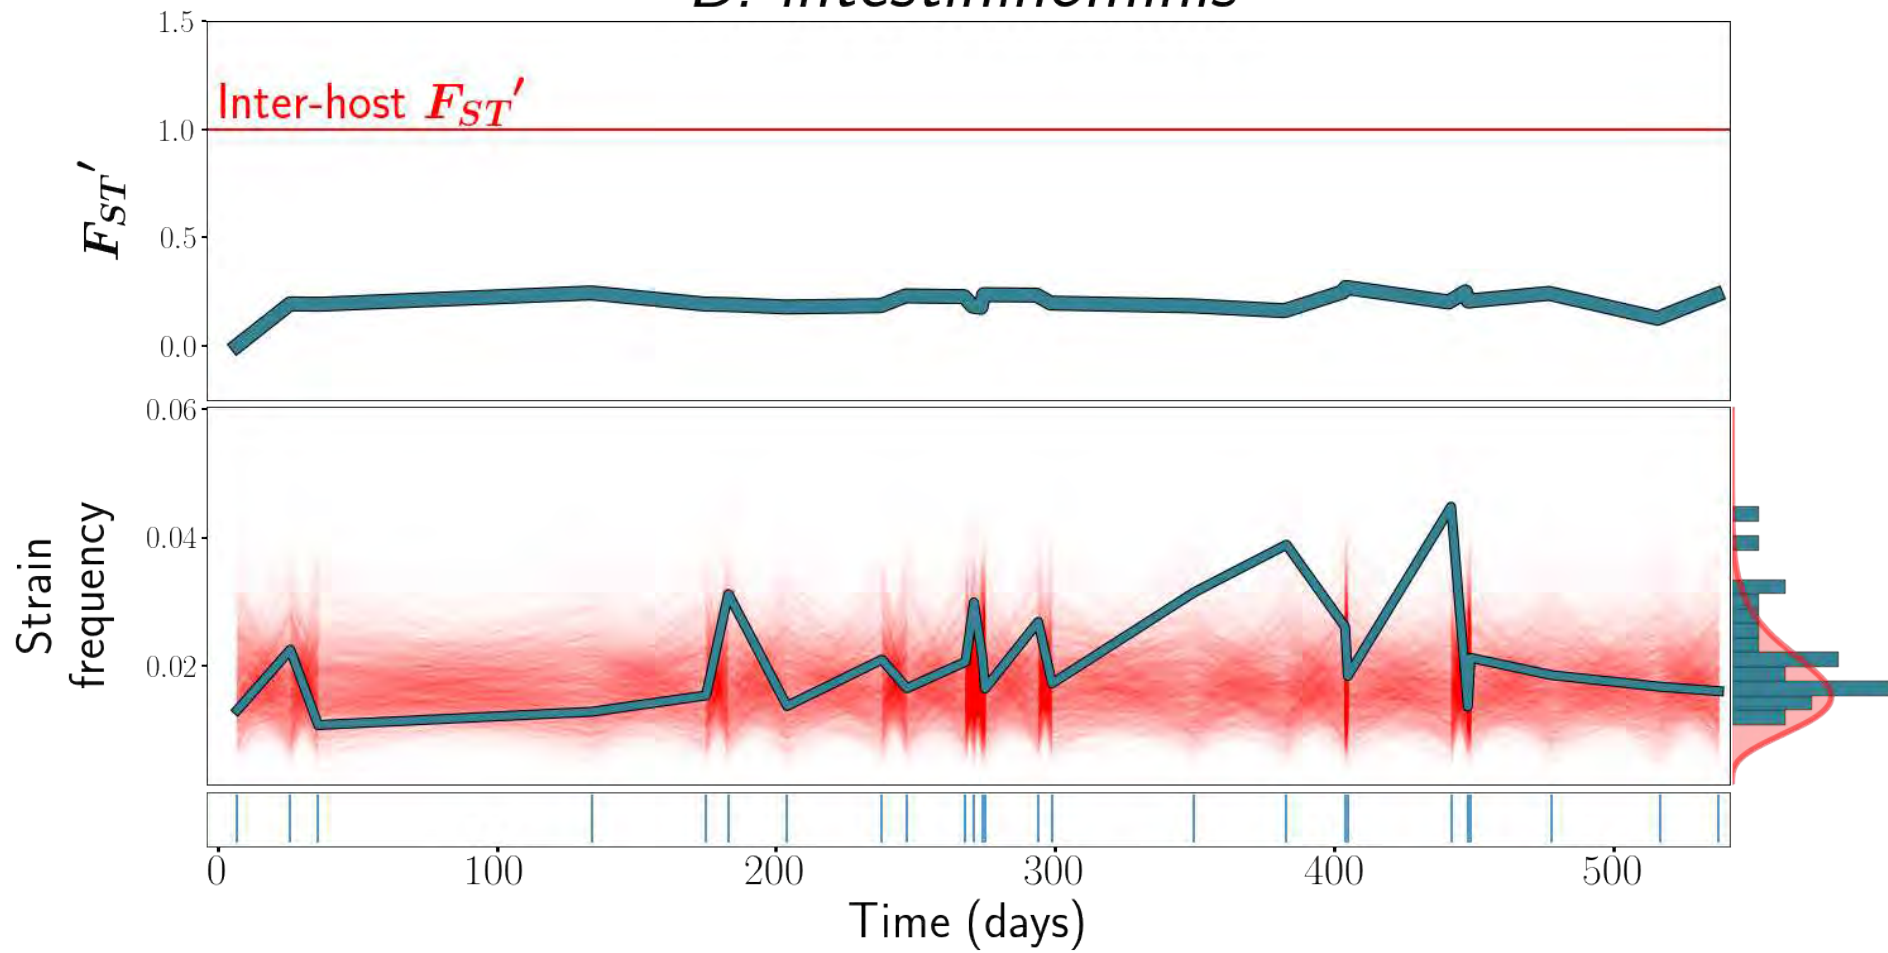

# *E. rectale*

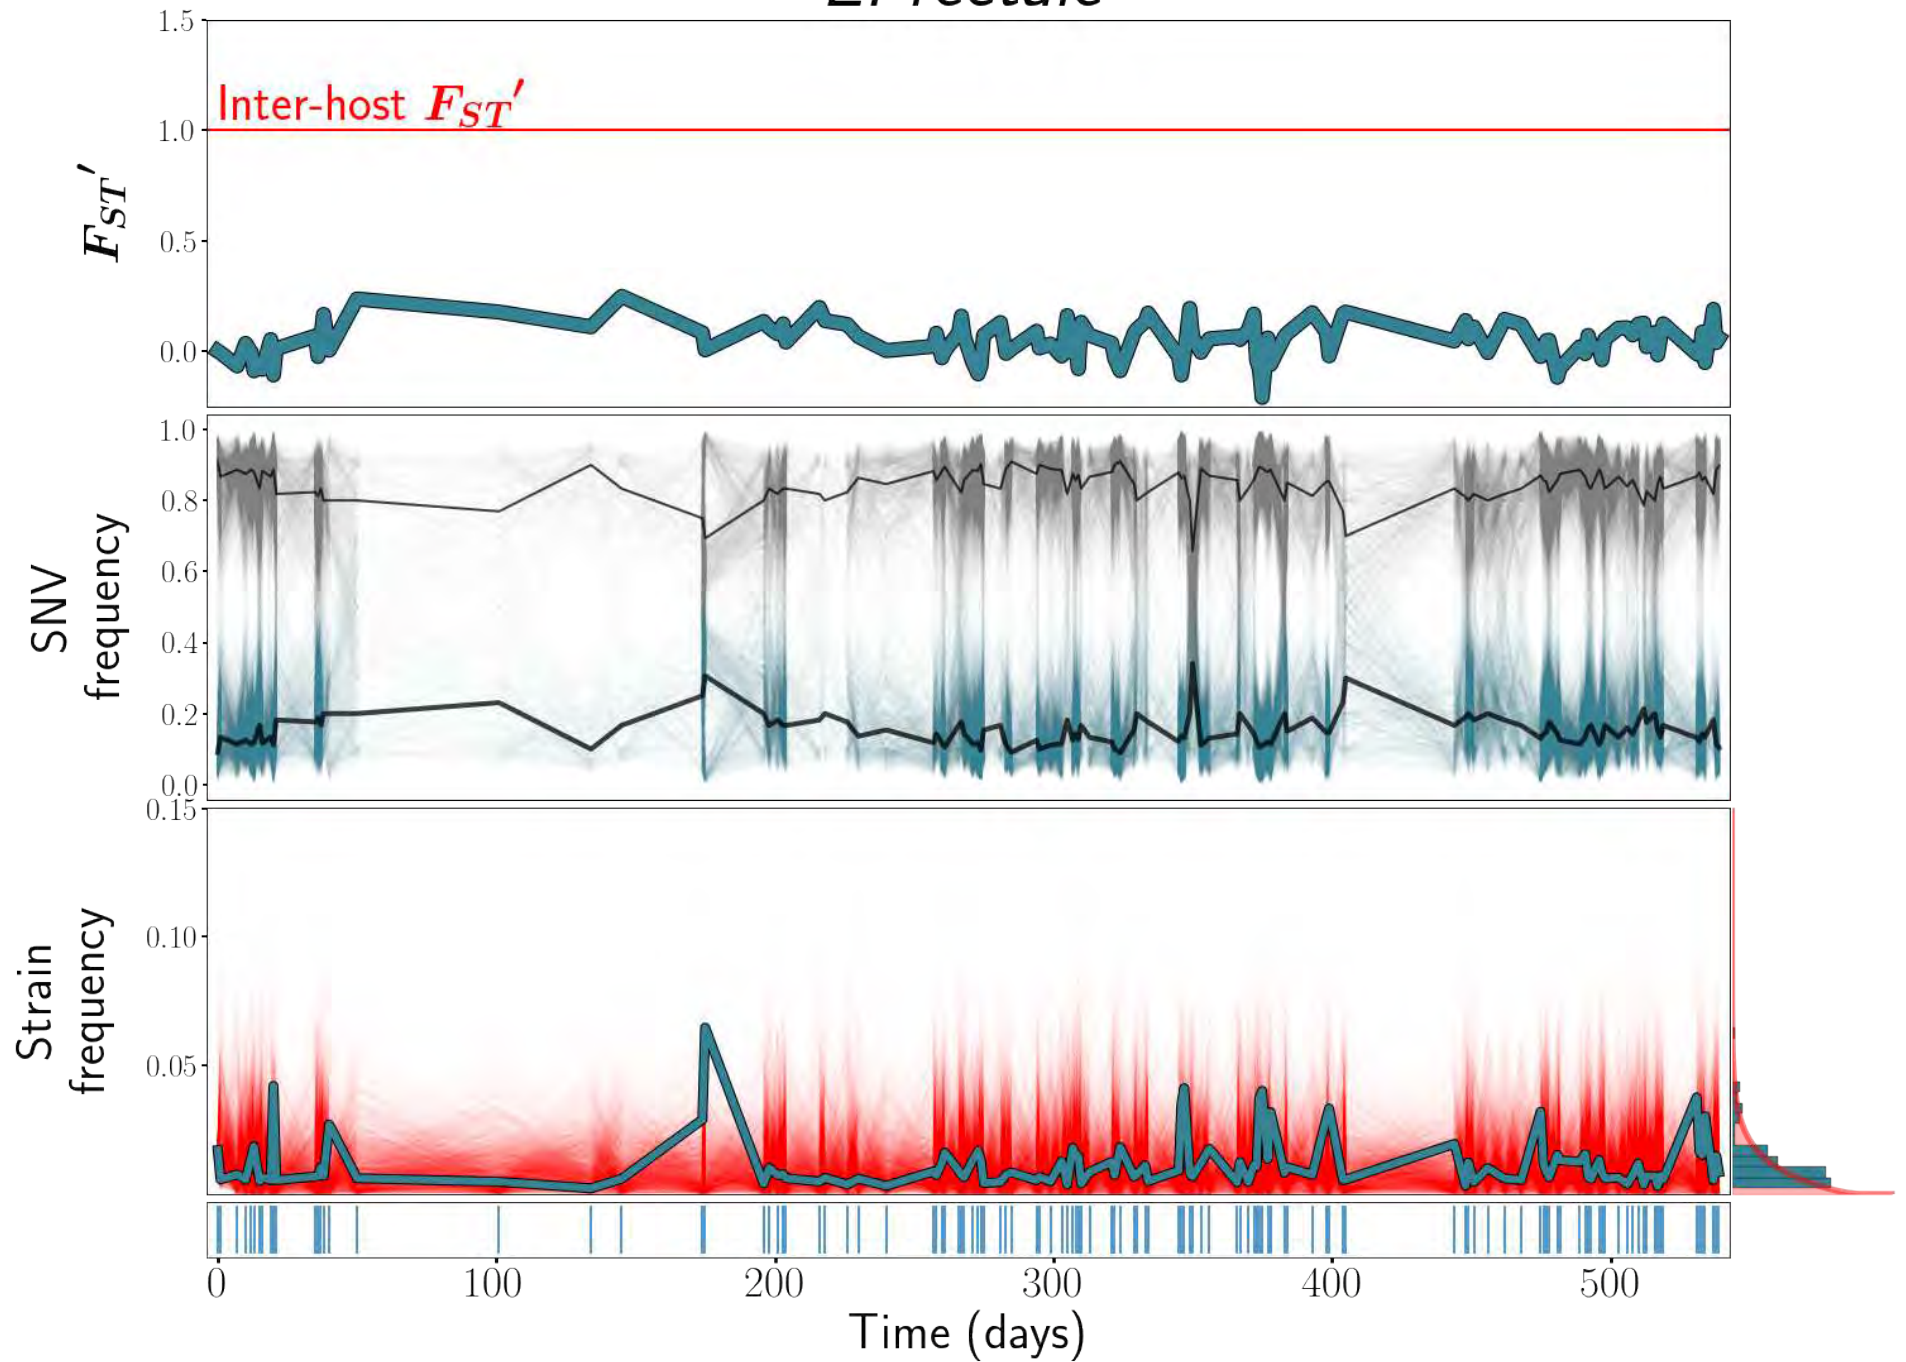

# *E. rectale*

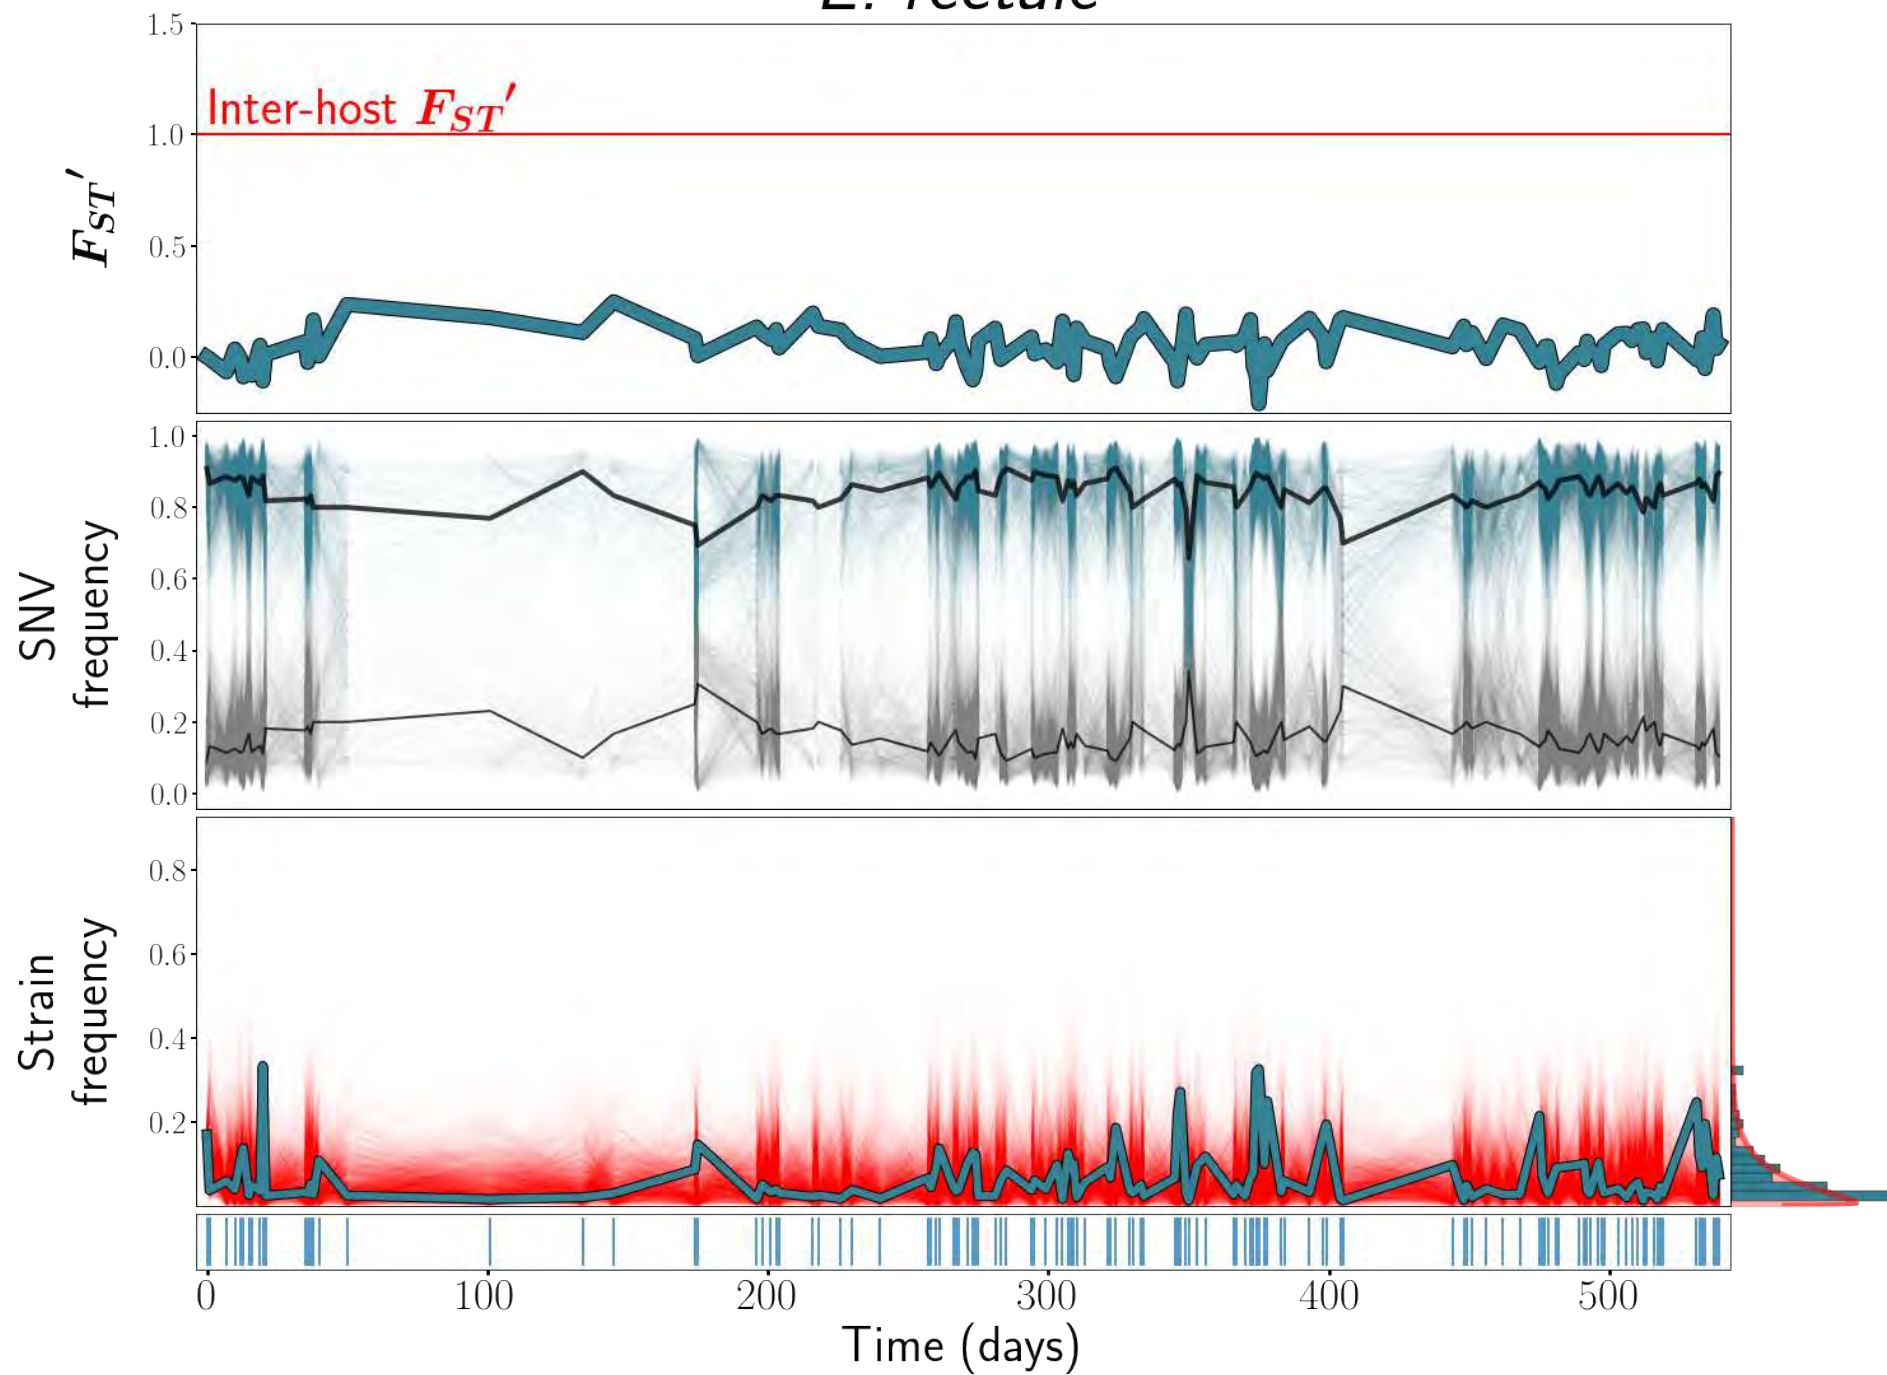

# *F. prausnitzii*

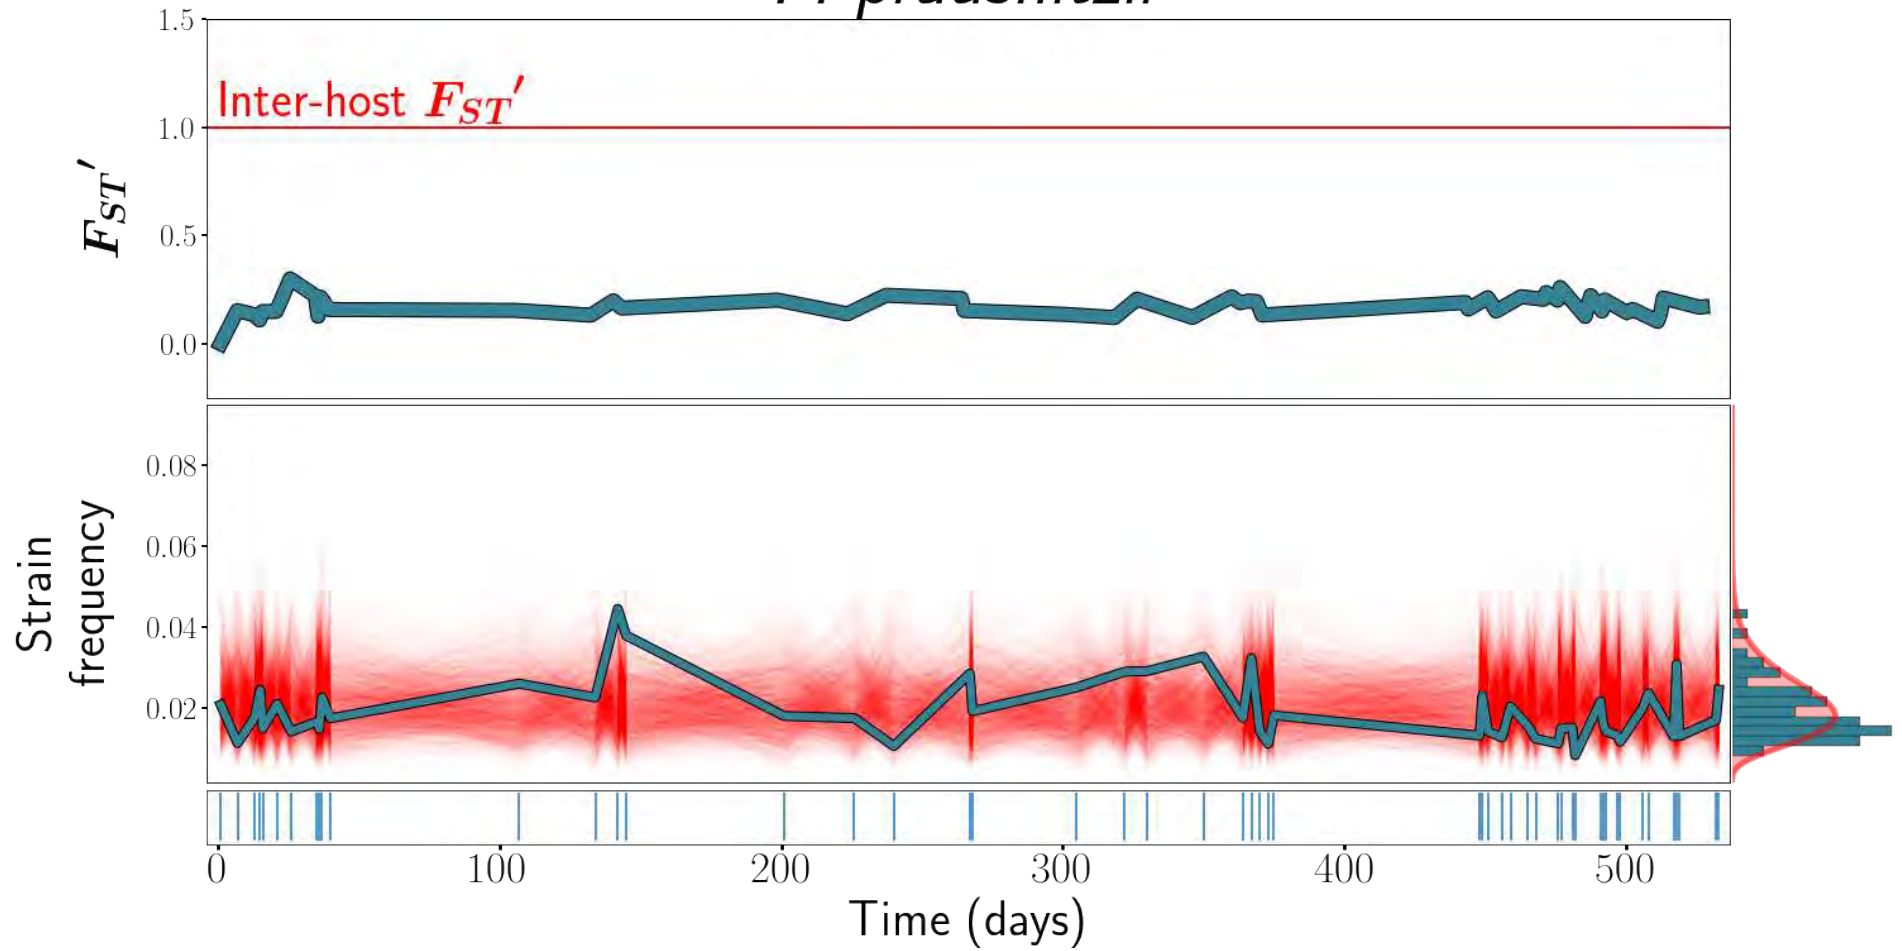

*P. merdae*

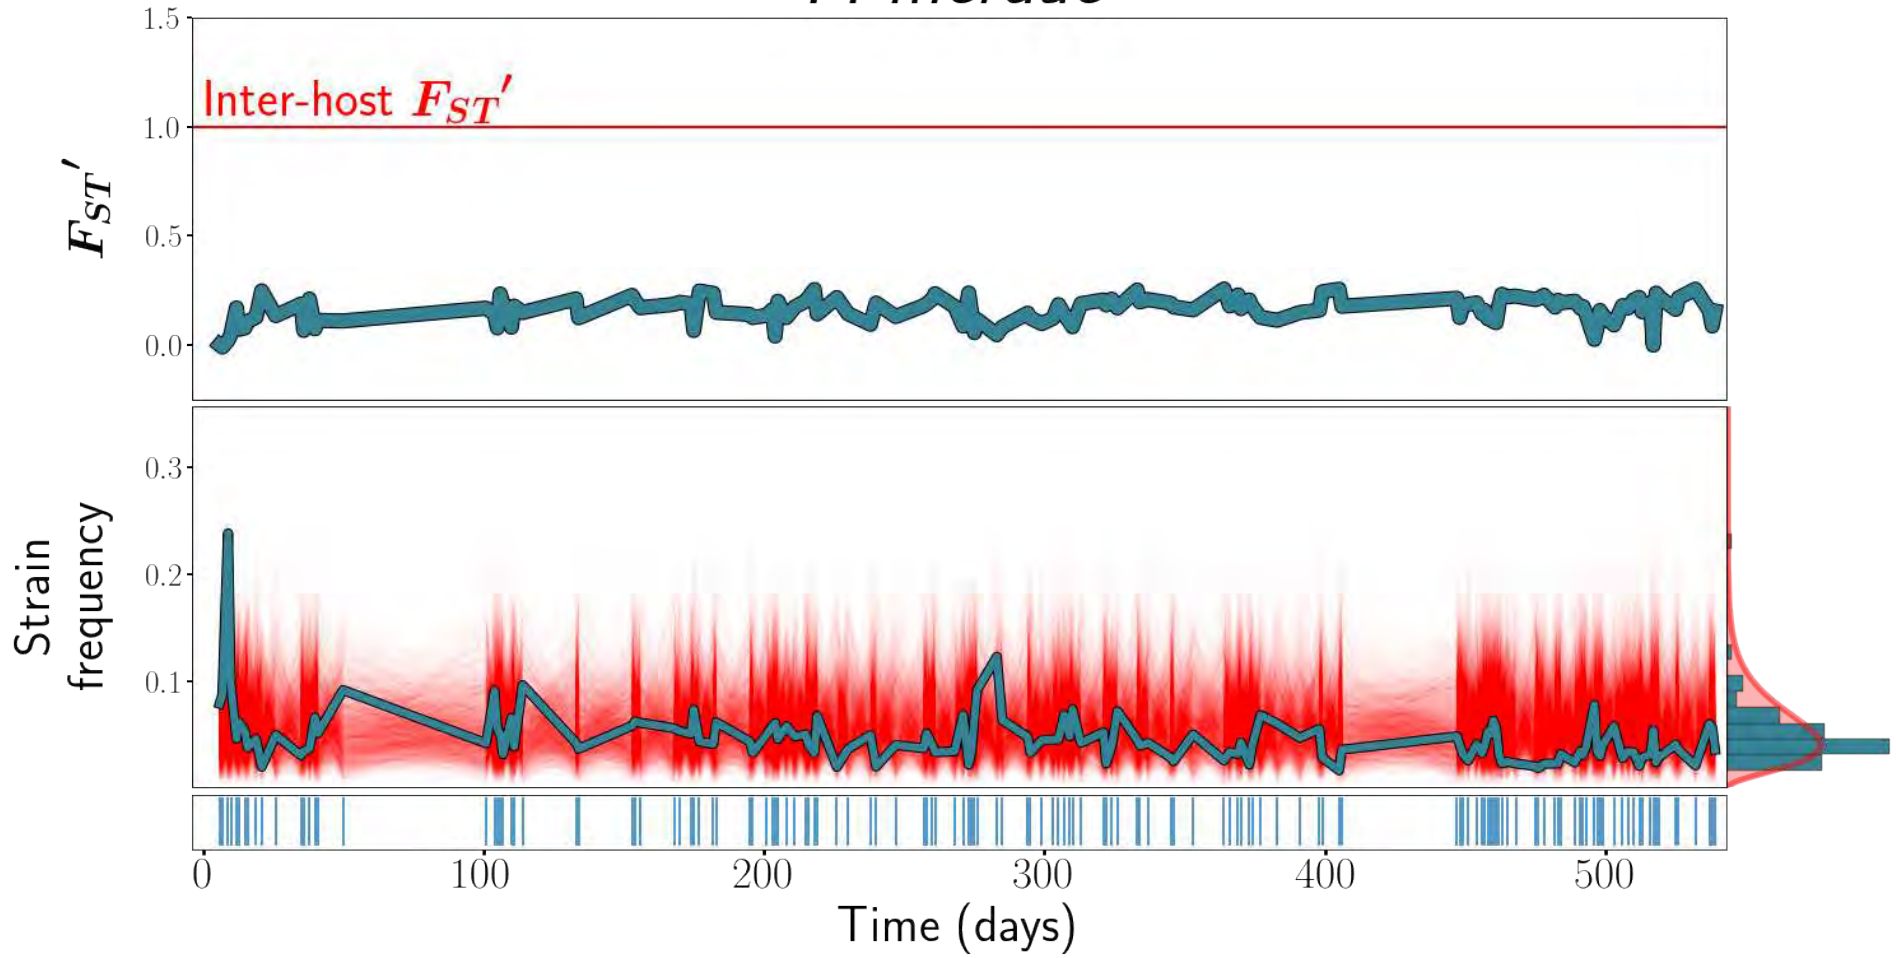

*P. sp*

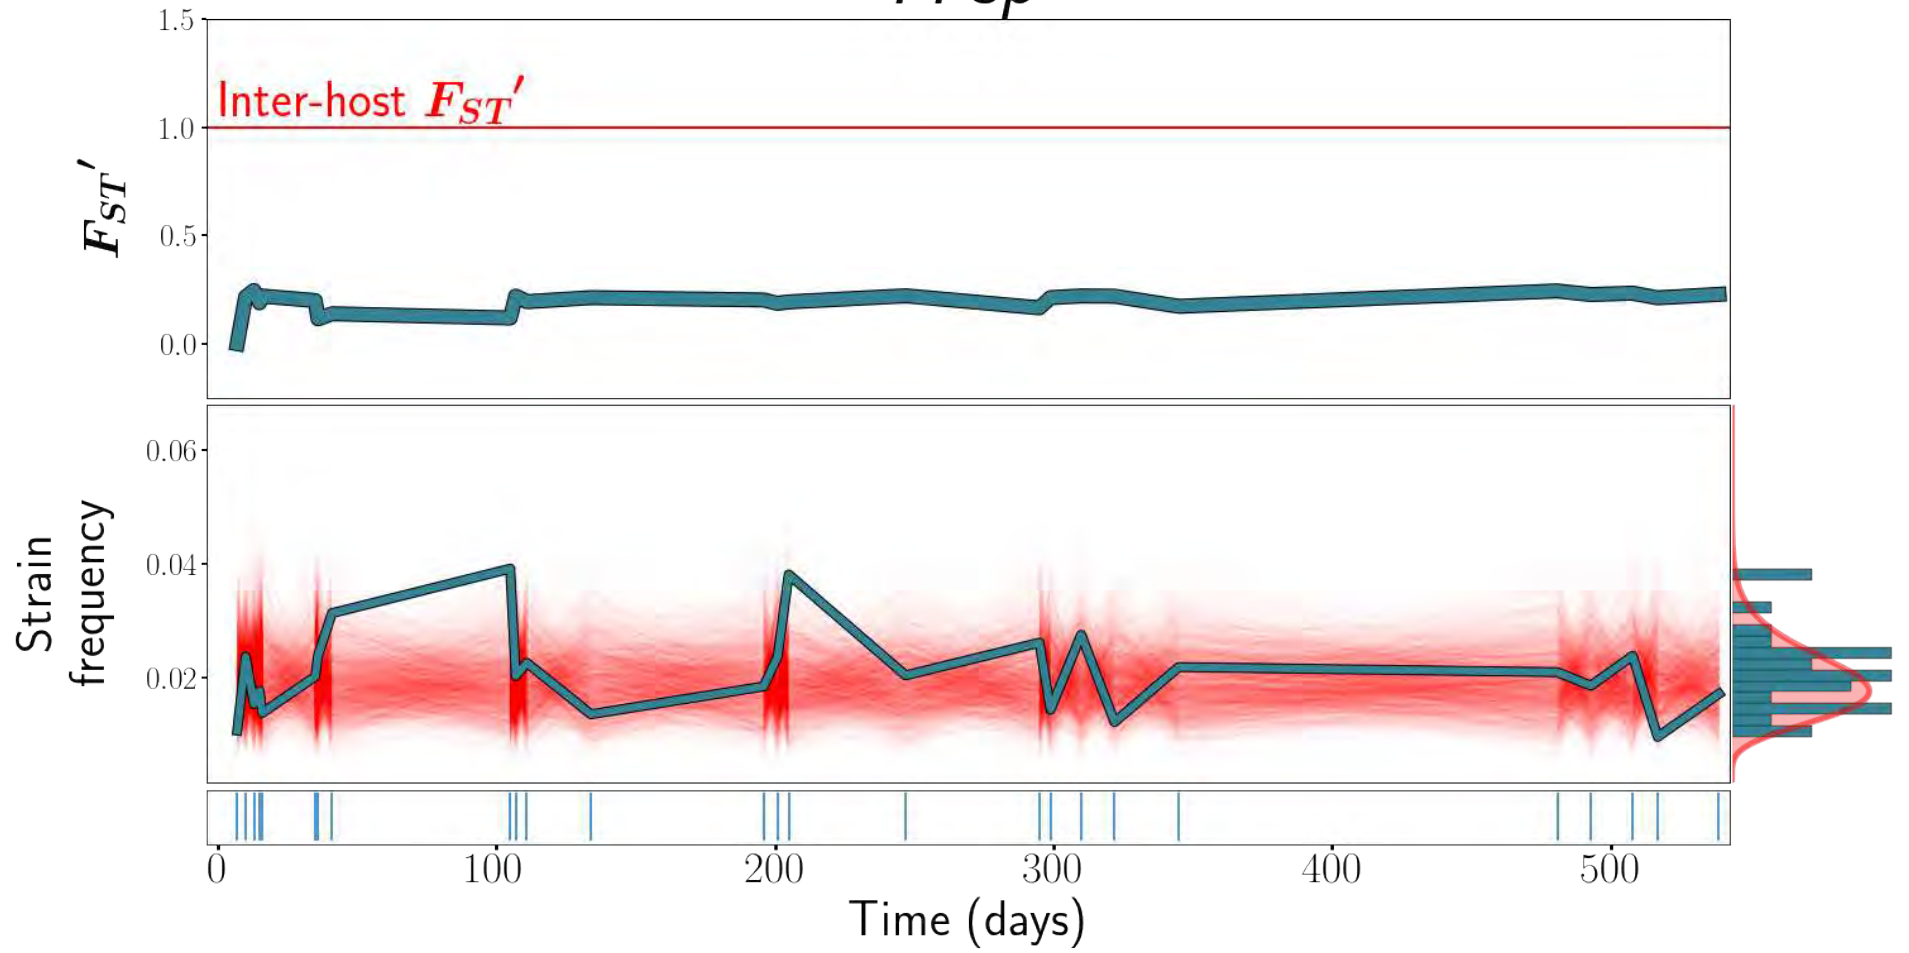

# *P. vulgatus*

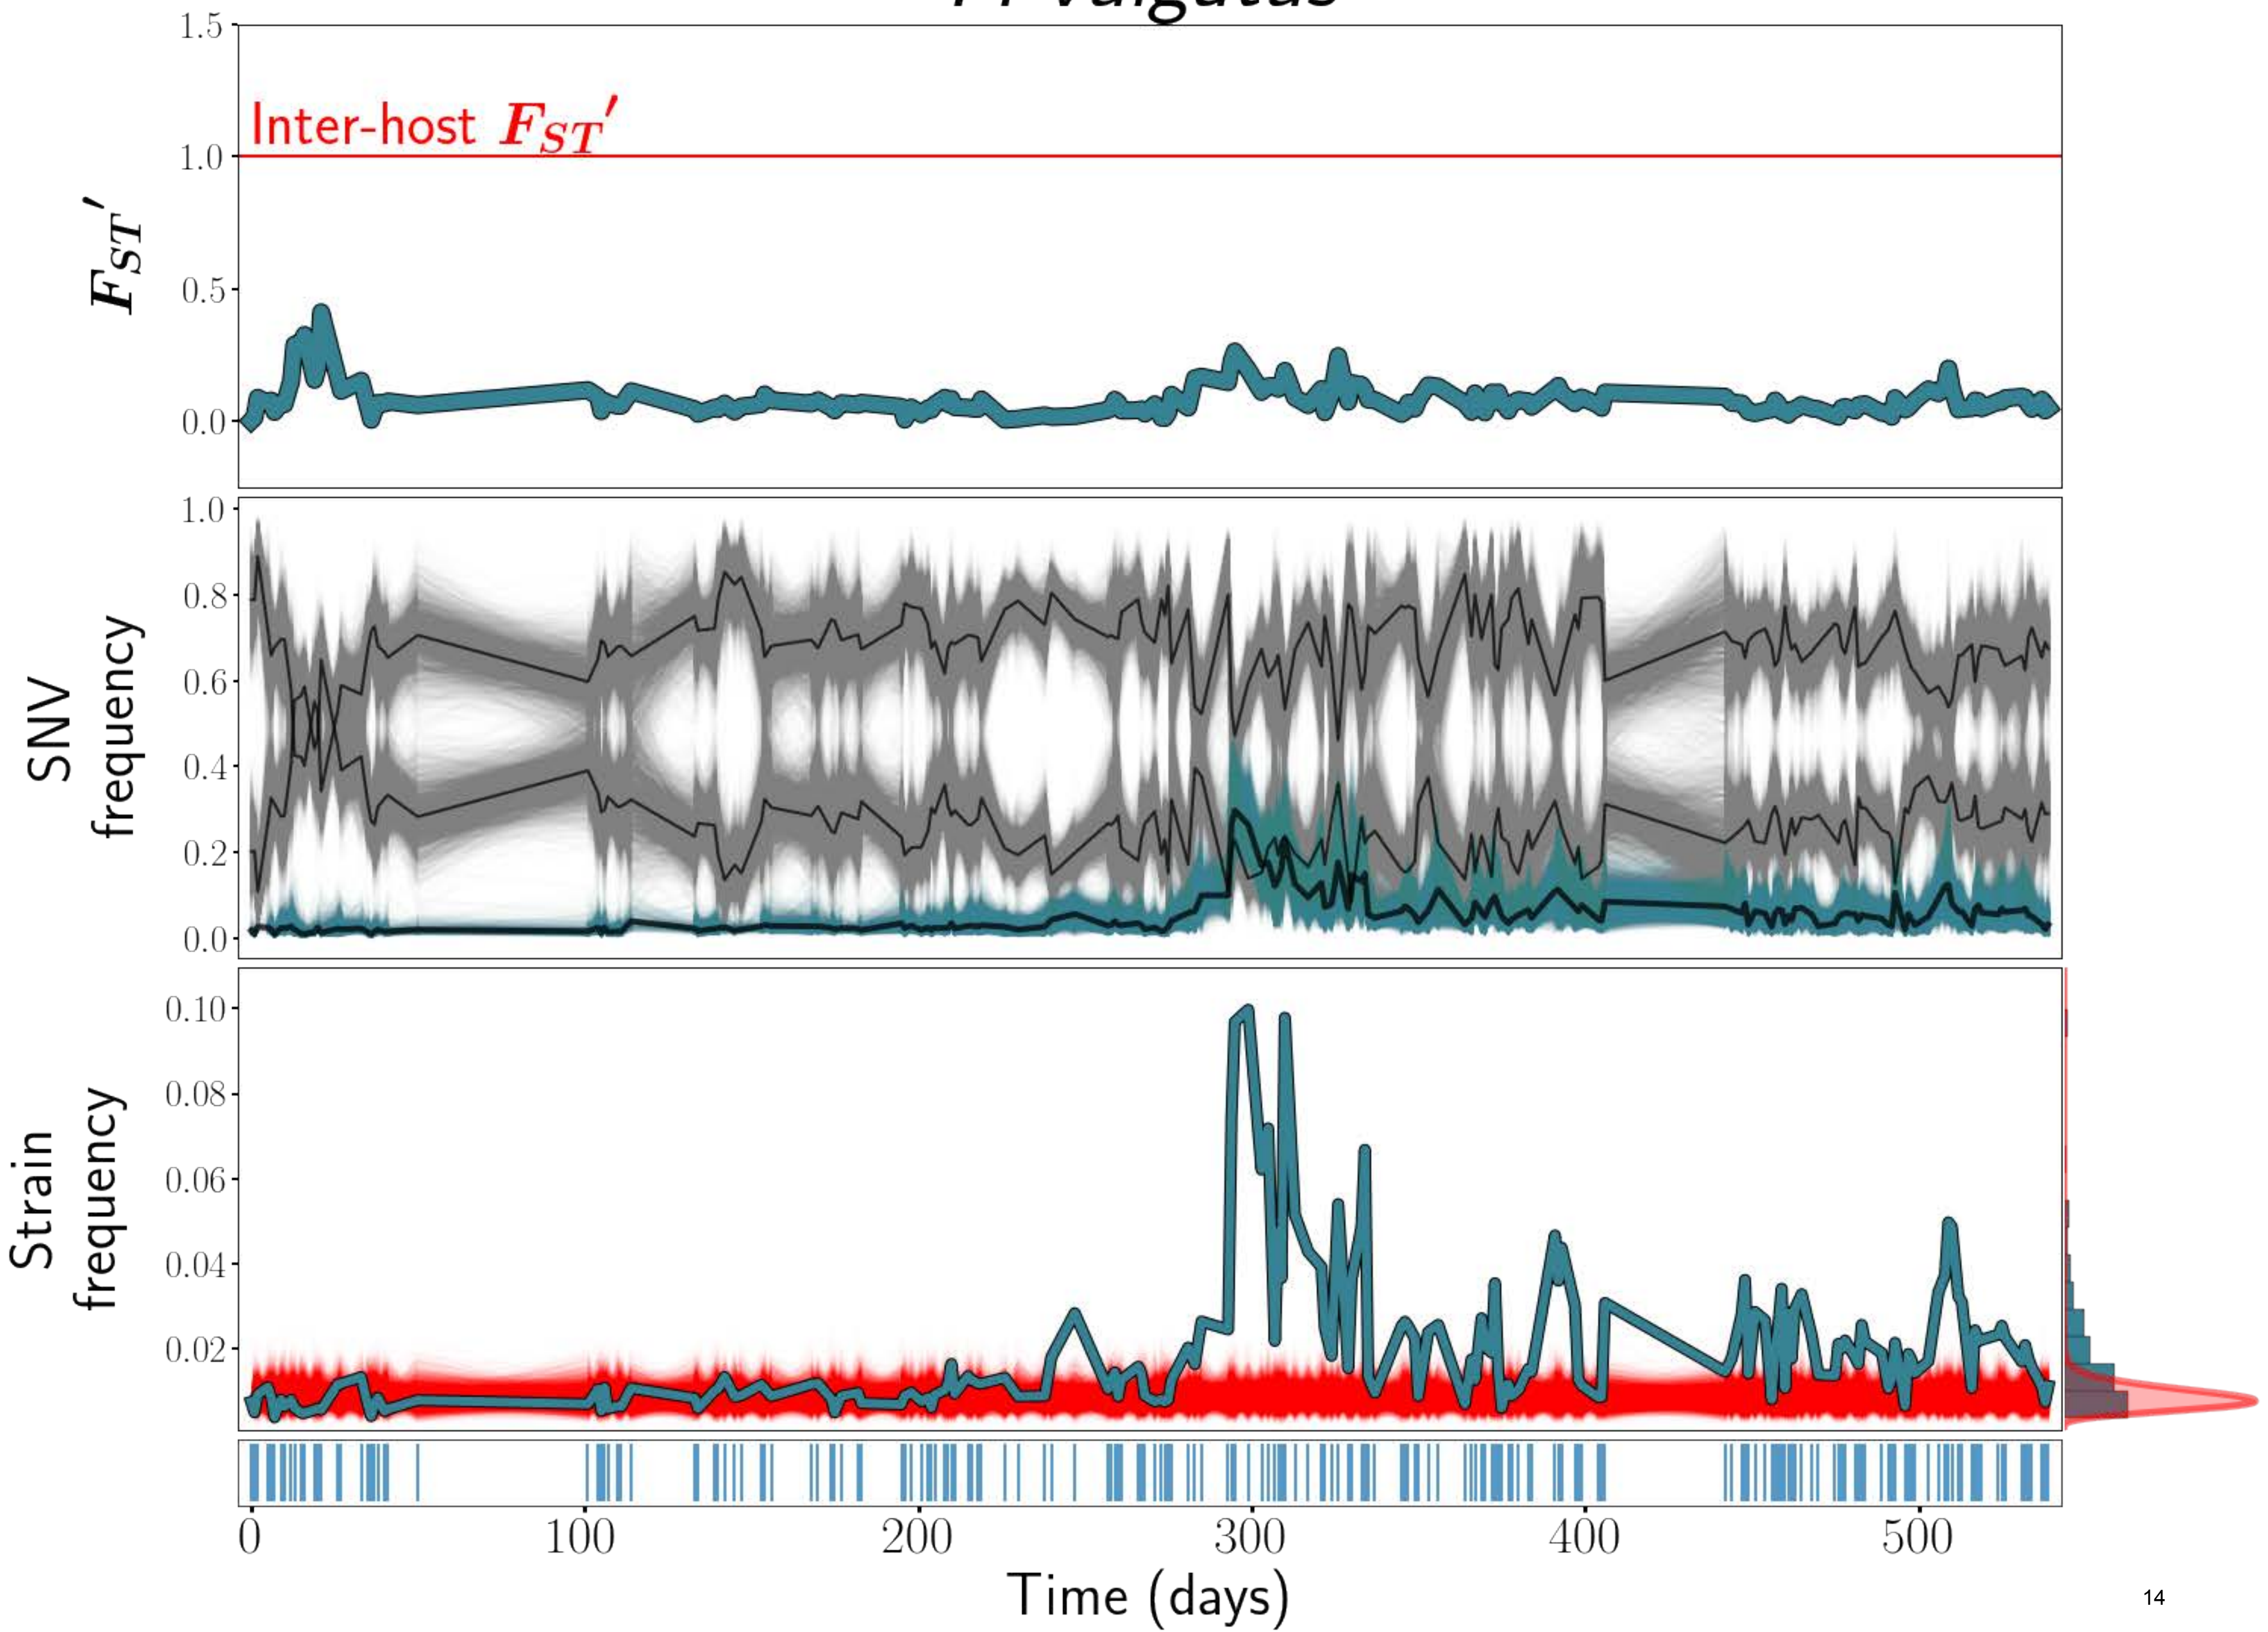

# *P. vulgatus*

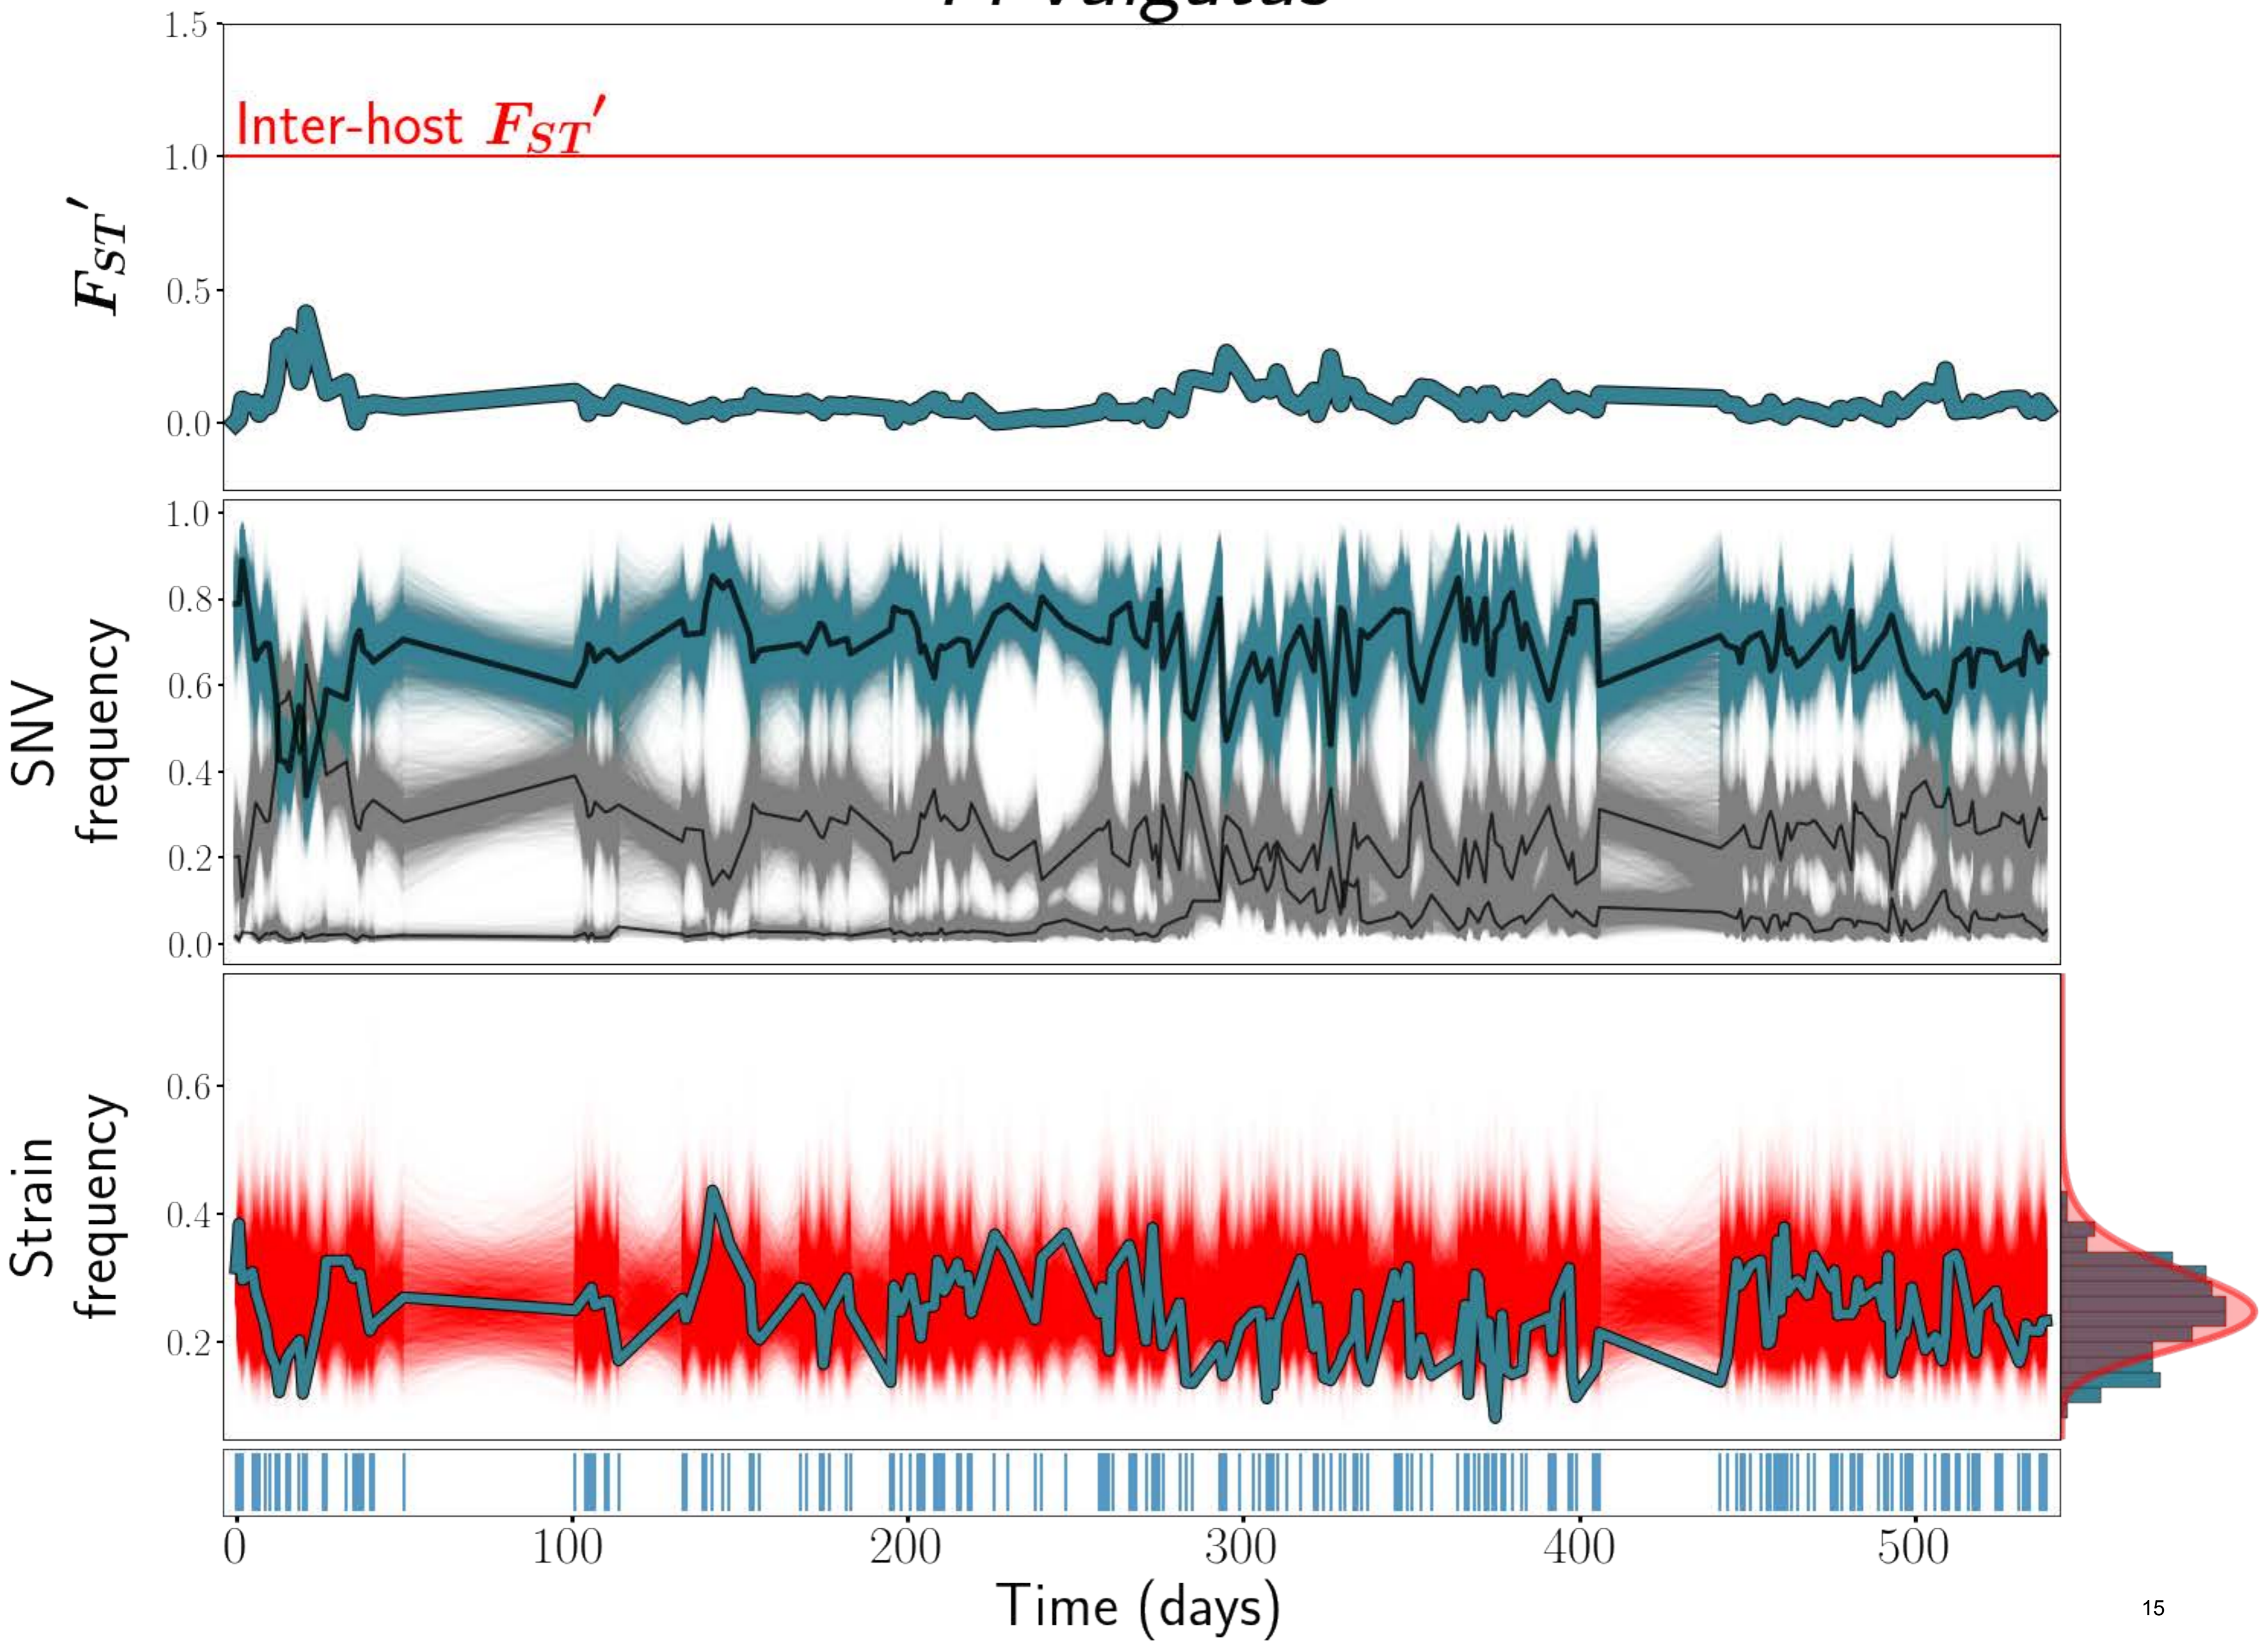



# *P. vulgatus*

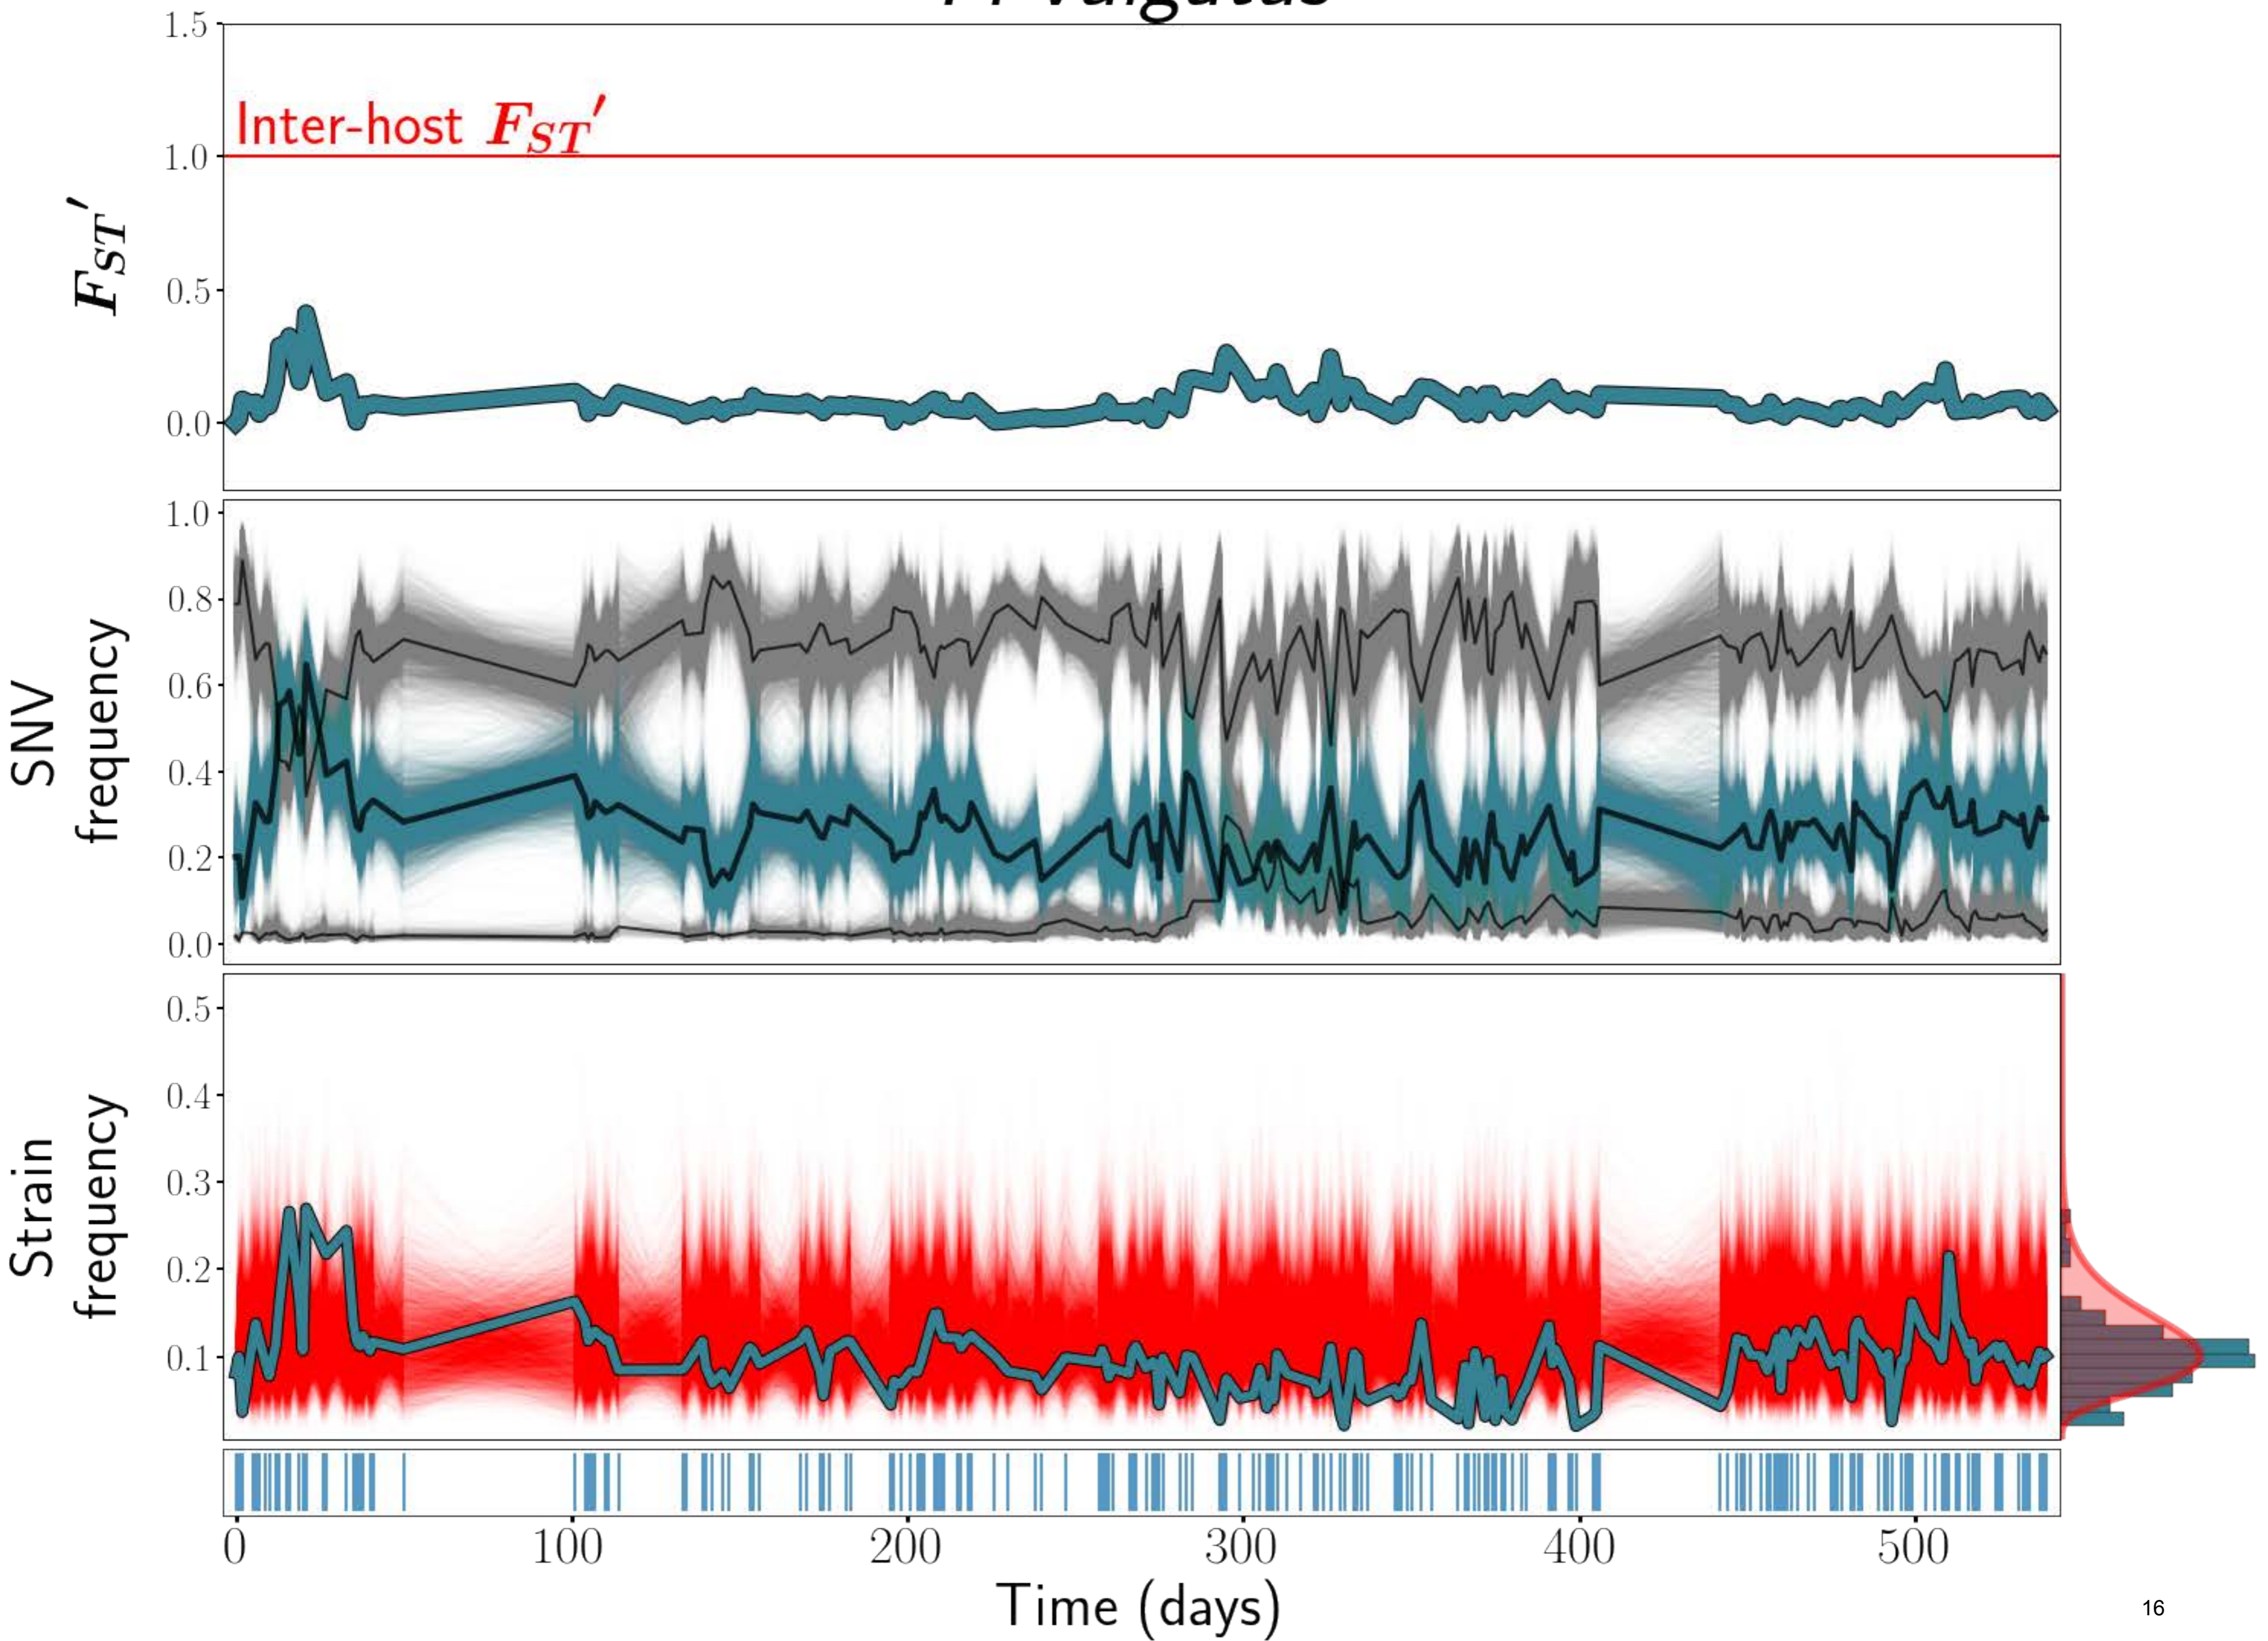

*R. bicirculans*

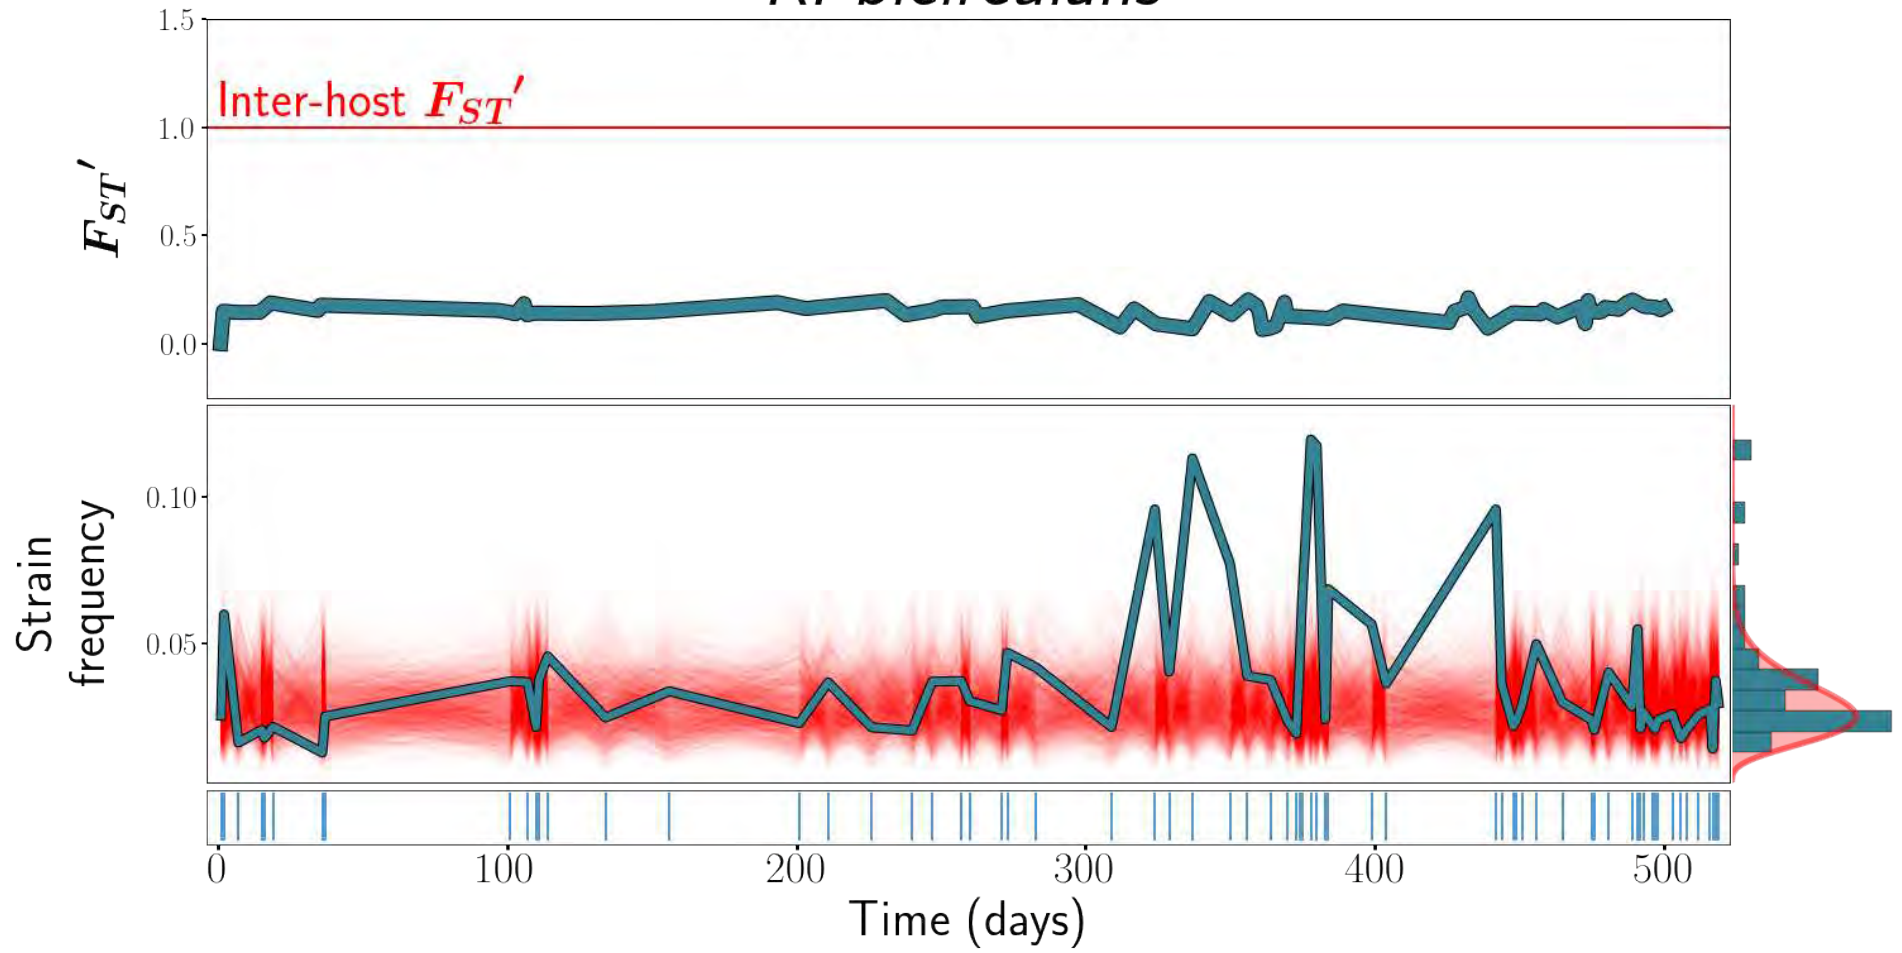

*R. bromii*

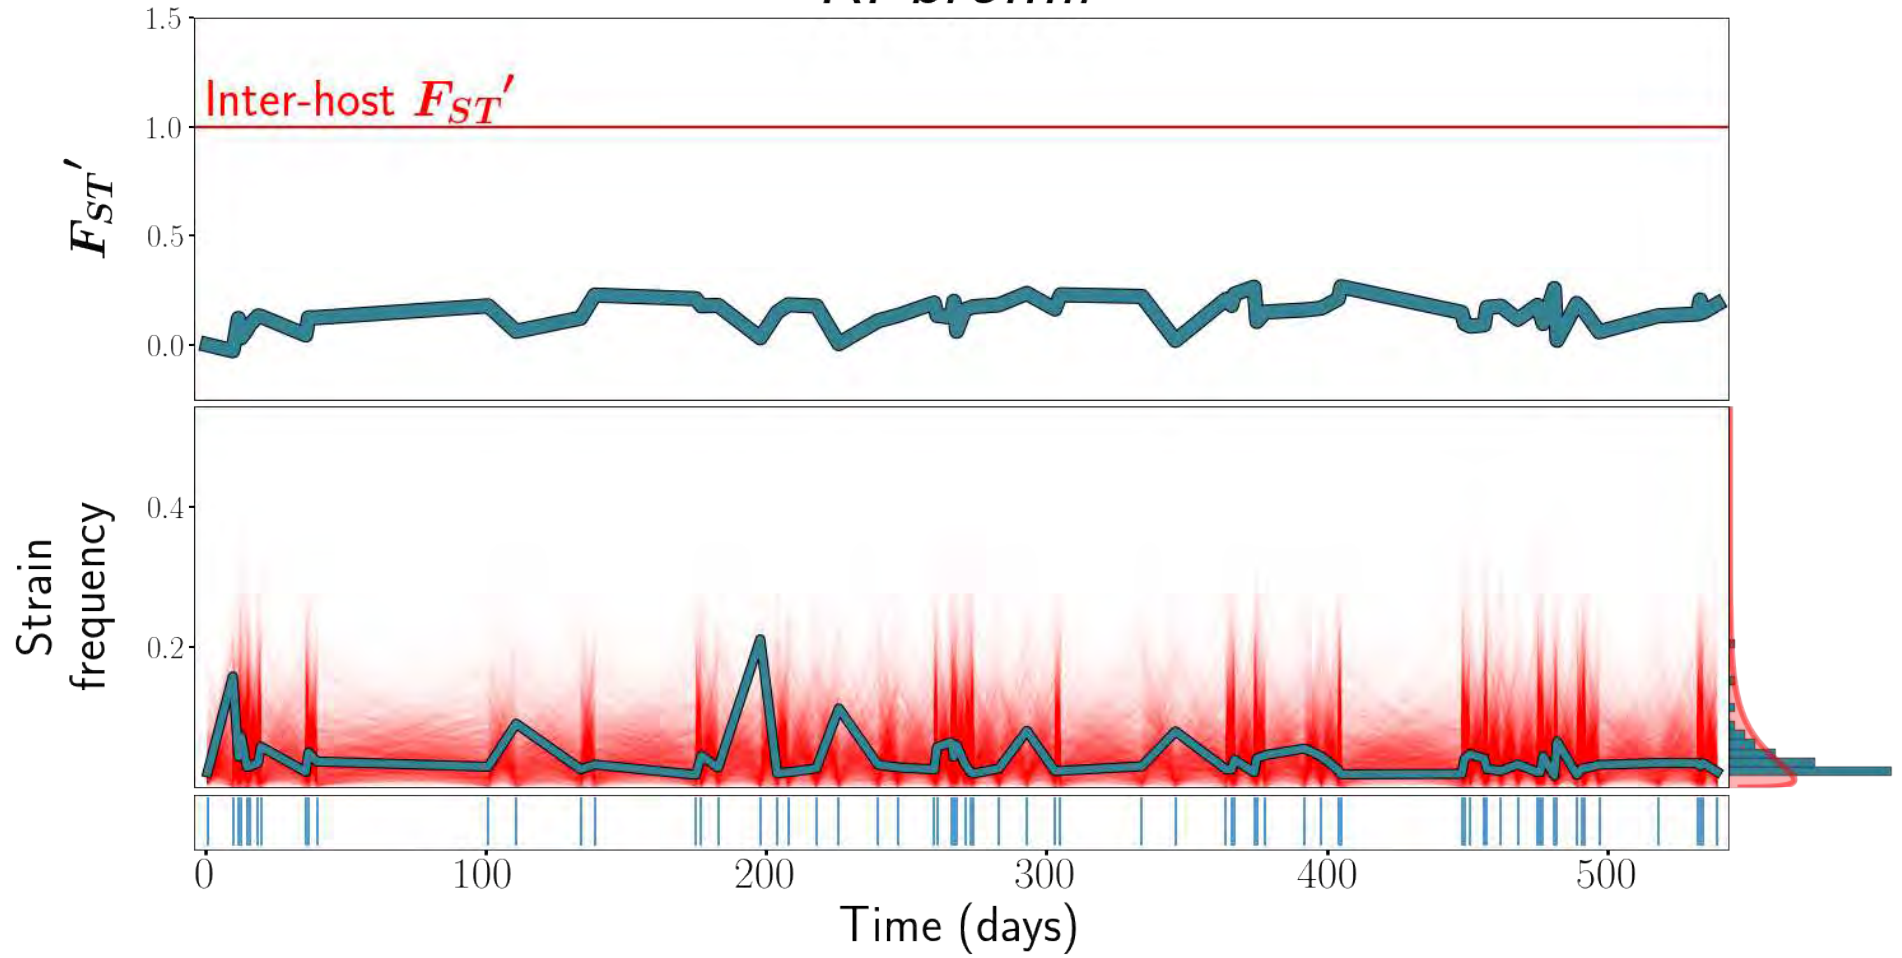

Supplement: mbio.02502-22-s0002.pdf [file mbio.02502-22-s0002.pdf]
