# Supplementary material for: Ecological Stability Emerges at the Level of Strains in the Human Gut Microbiome
Source: PubMed Central journal article supplement (PMC10127601; doi:10.1128/mbio.02502-22), 2023-02-21

# S3 Text

$F_{ST}$ , strain frequency, and strain abundance dynamics plots for all species analyzed, for host *ao*. These plots are analogous to Main Text Figure 1. When only a single strain was detected, only  $F_{ST}$  and strain abundance dynamics plots, but no strain frequency plot, is included.

## *Table of contents*

|                                               |    |
|-----------------------------------------------|----|
| <i>Bacteroides fragilis A</i>                 | 1  |
| <i>Bacteroides ovatus A</i>                   | 2  |
| <i>Bacteroides ovatus B</i>                   | 3  |
| <i>Bacteroides uniformis A</i>                | 4  |
| <i>Bacteroides xylanisolvens A</i>            | 5  |
| <i>Bacteroides xylanisolvens B</i>            | 6  |
| <i>Bifidobacterium adolescentis</i>           | 7  |
| <i>Dialister invisus A</i>                    | 8  |
| <i>Eubacterium rectale A</i>                  | 9  |
| <i>Faecalibacterium prausnitzii (61481) A</i> | 10 |
| <i>Faecalibacterium prausnitzii (61481) B</i> | 11 |
| <i>Faecalibacterium prausnitzii (62201) A</i> | 12 |
| <i>Lachnospira eligens A</i>                  | 13 |
| <i>Ruminococcus bicirculans A</i>             | 14 |
| <i>Parabacteroides distasonis A</i>           | 15 |

# *B. fragilis*

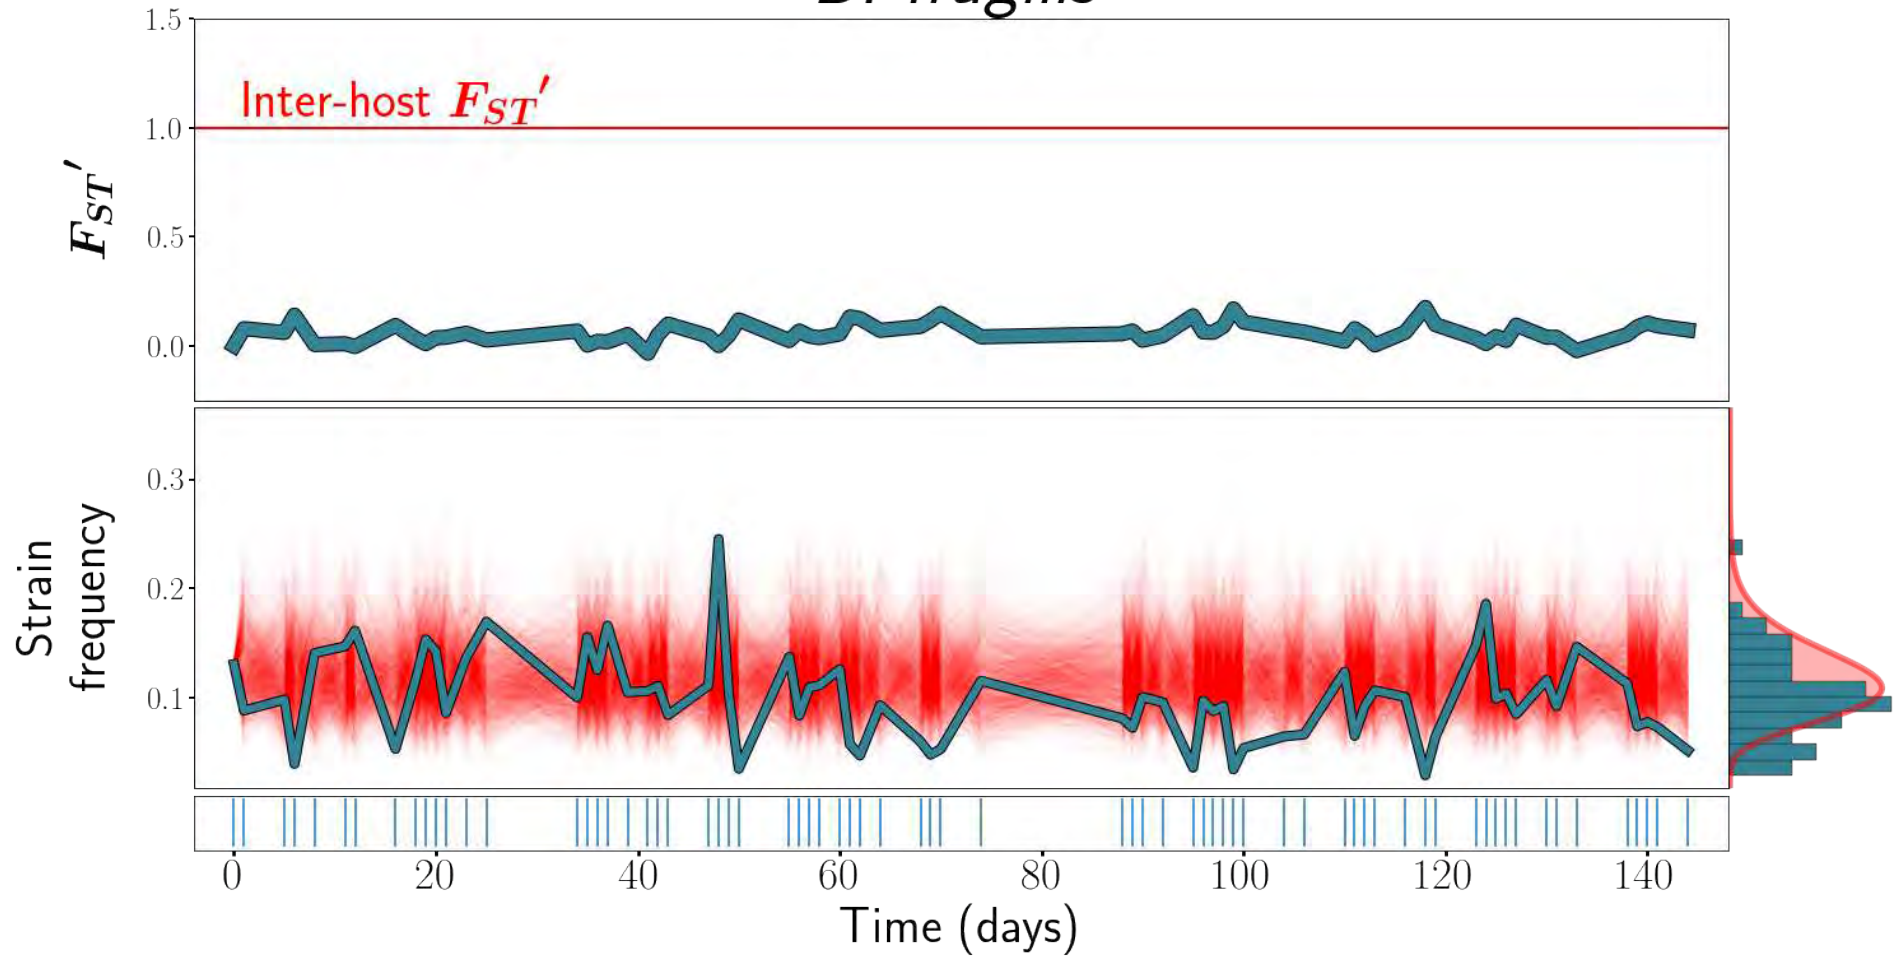

*B. ovatus*

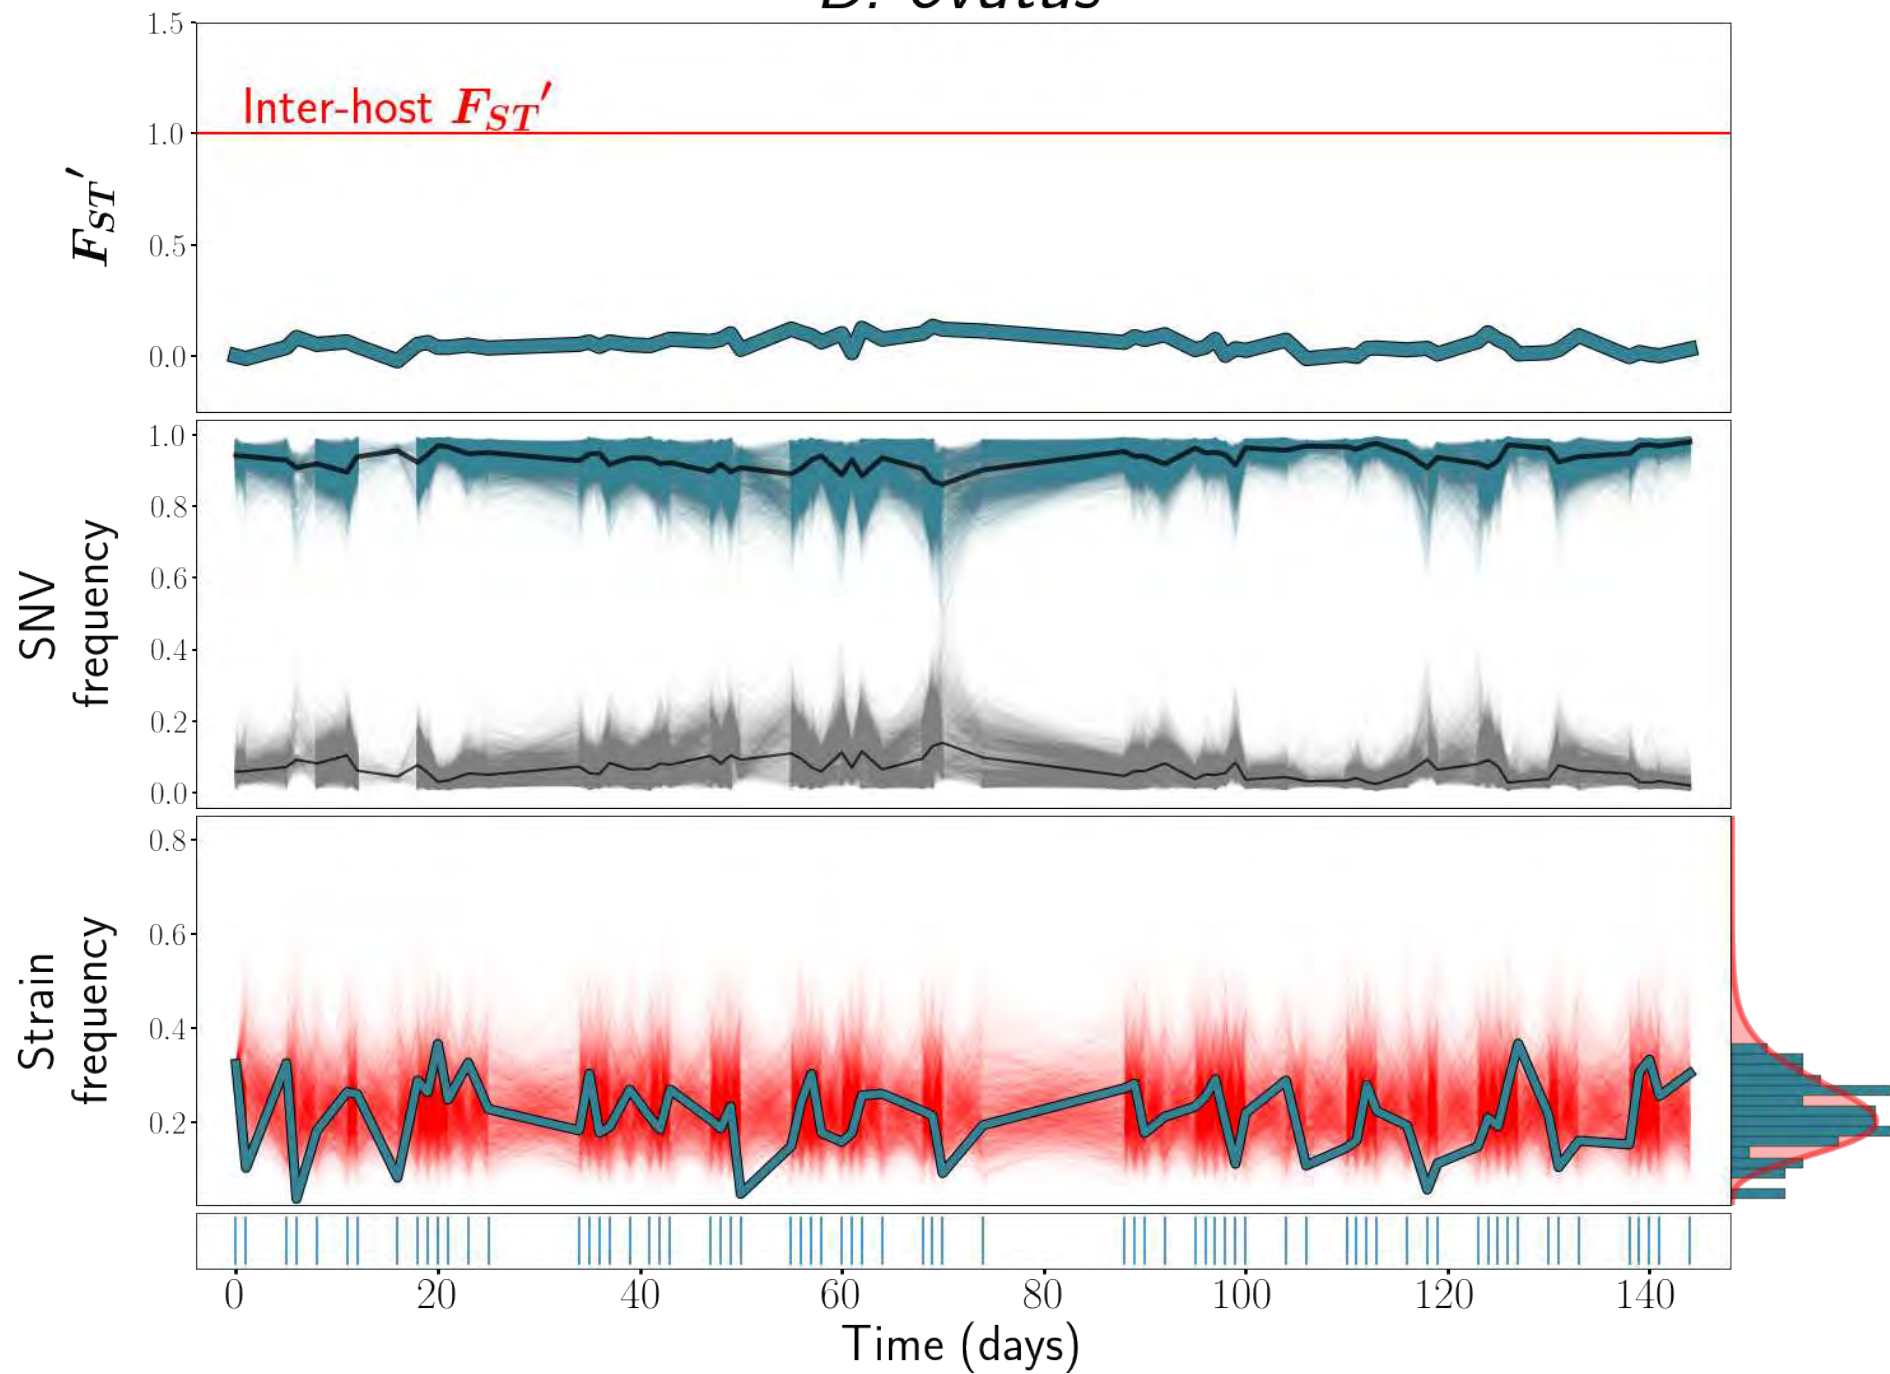

# *B. ovatus*

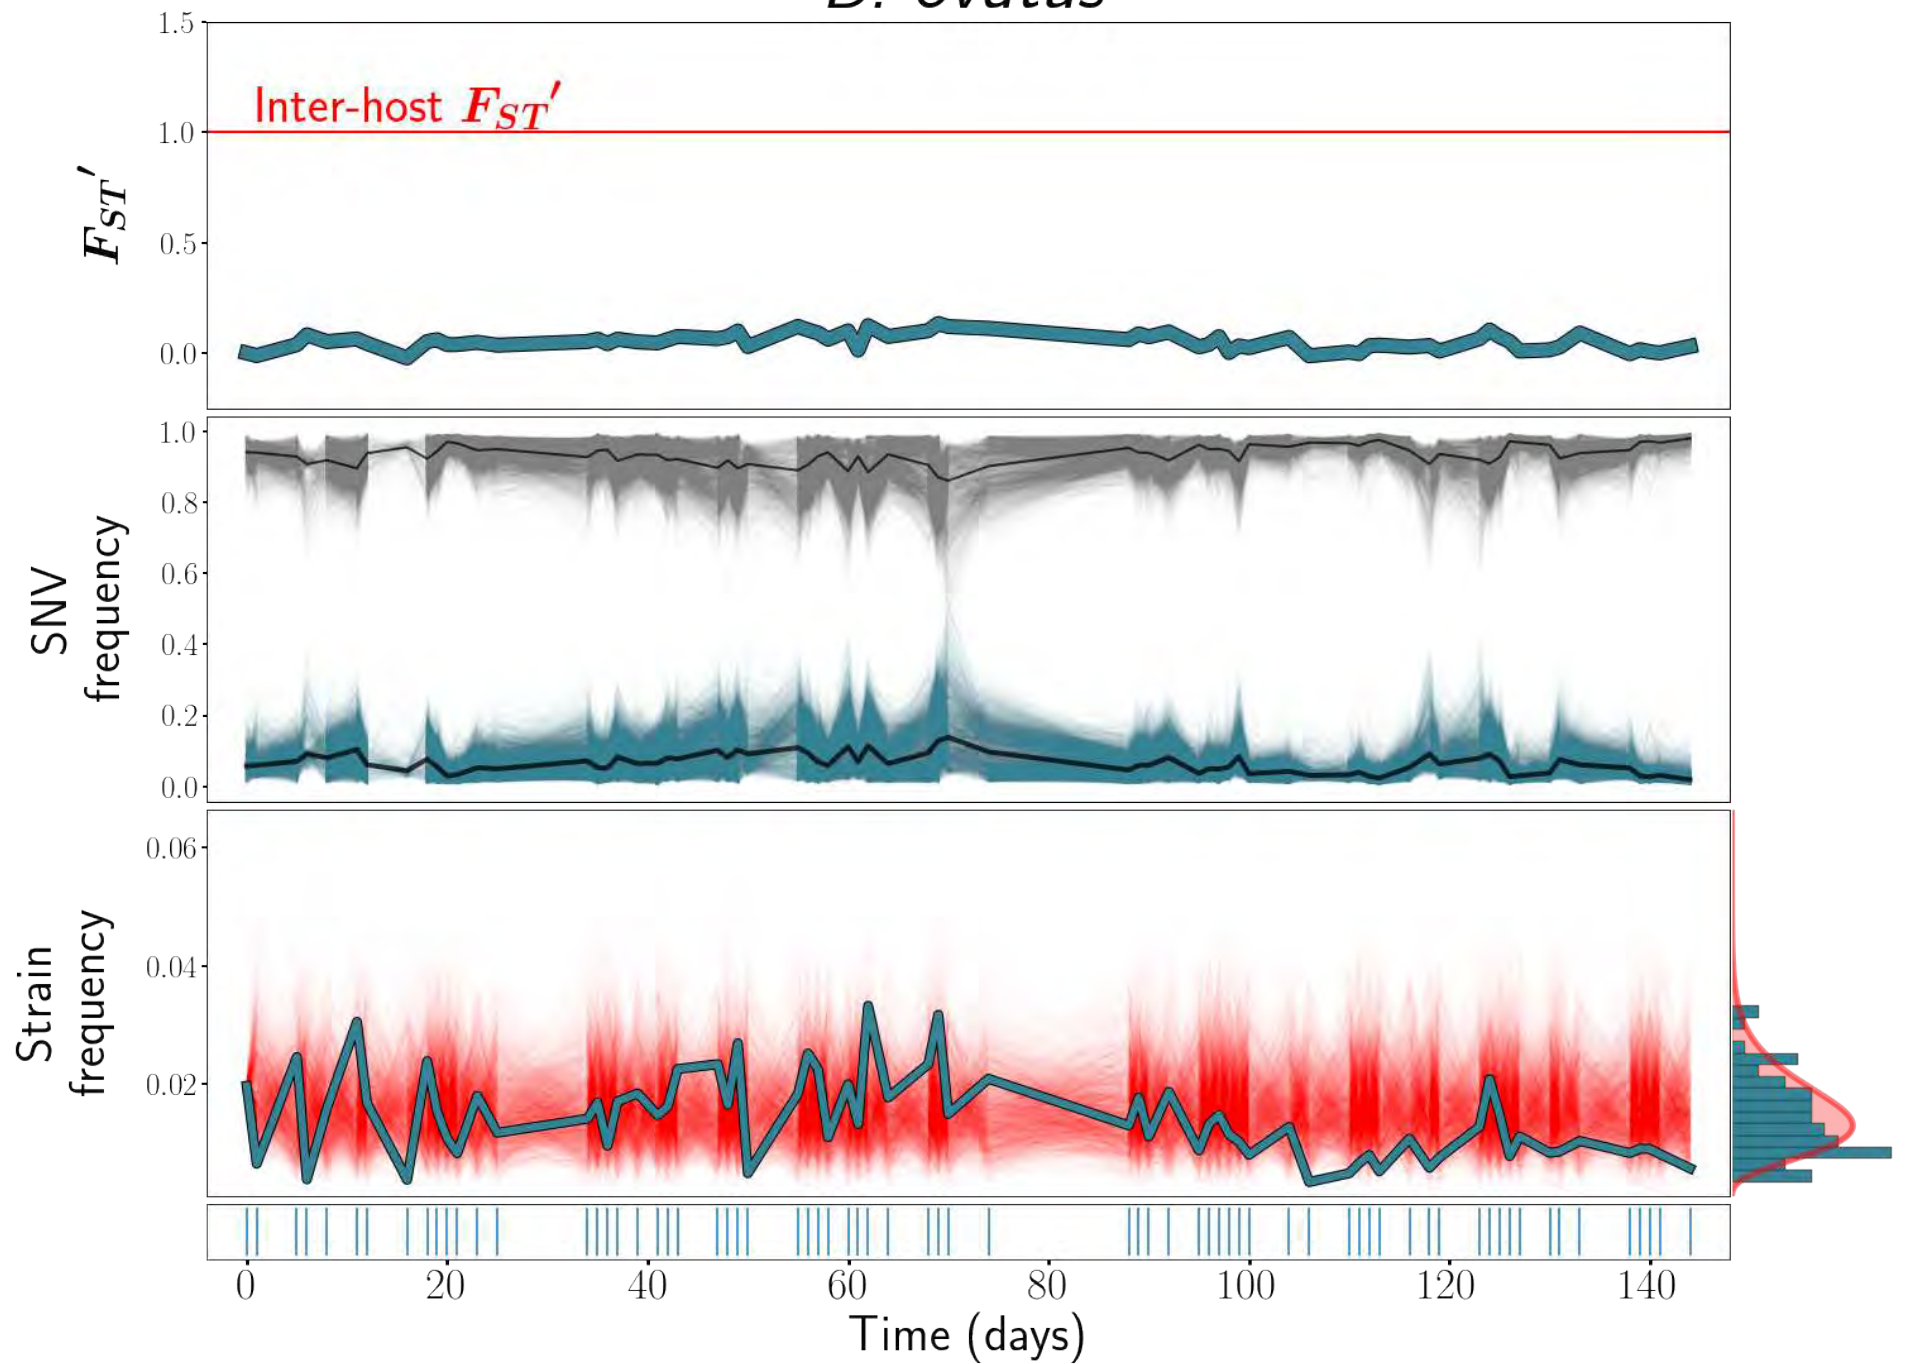

*B. uniformis*

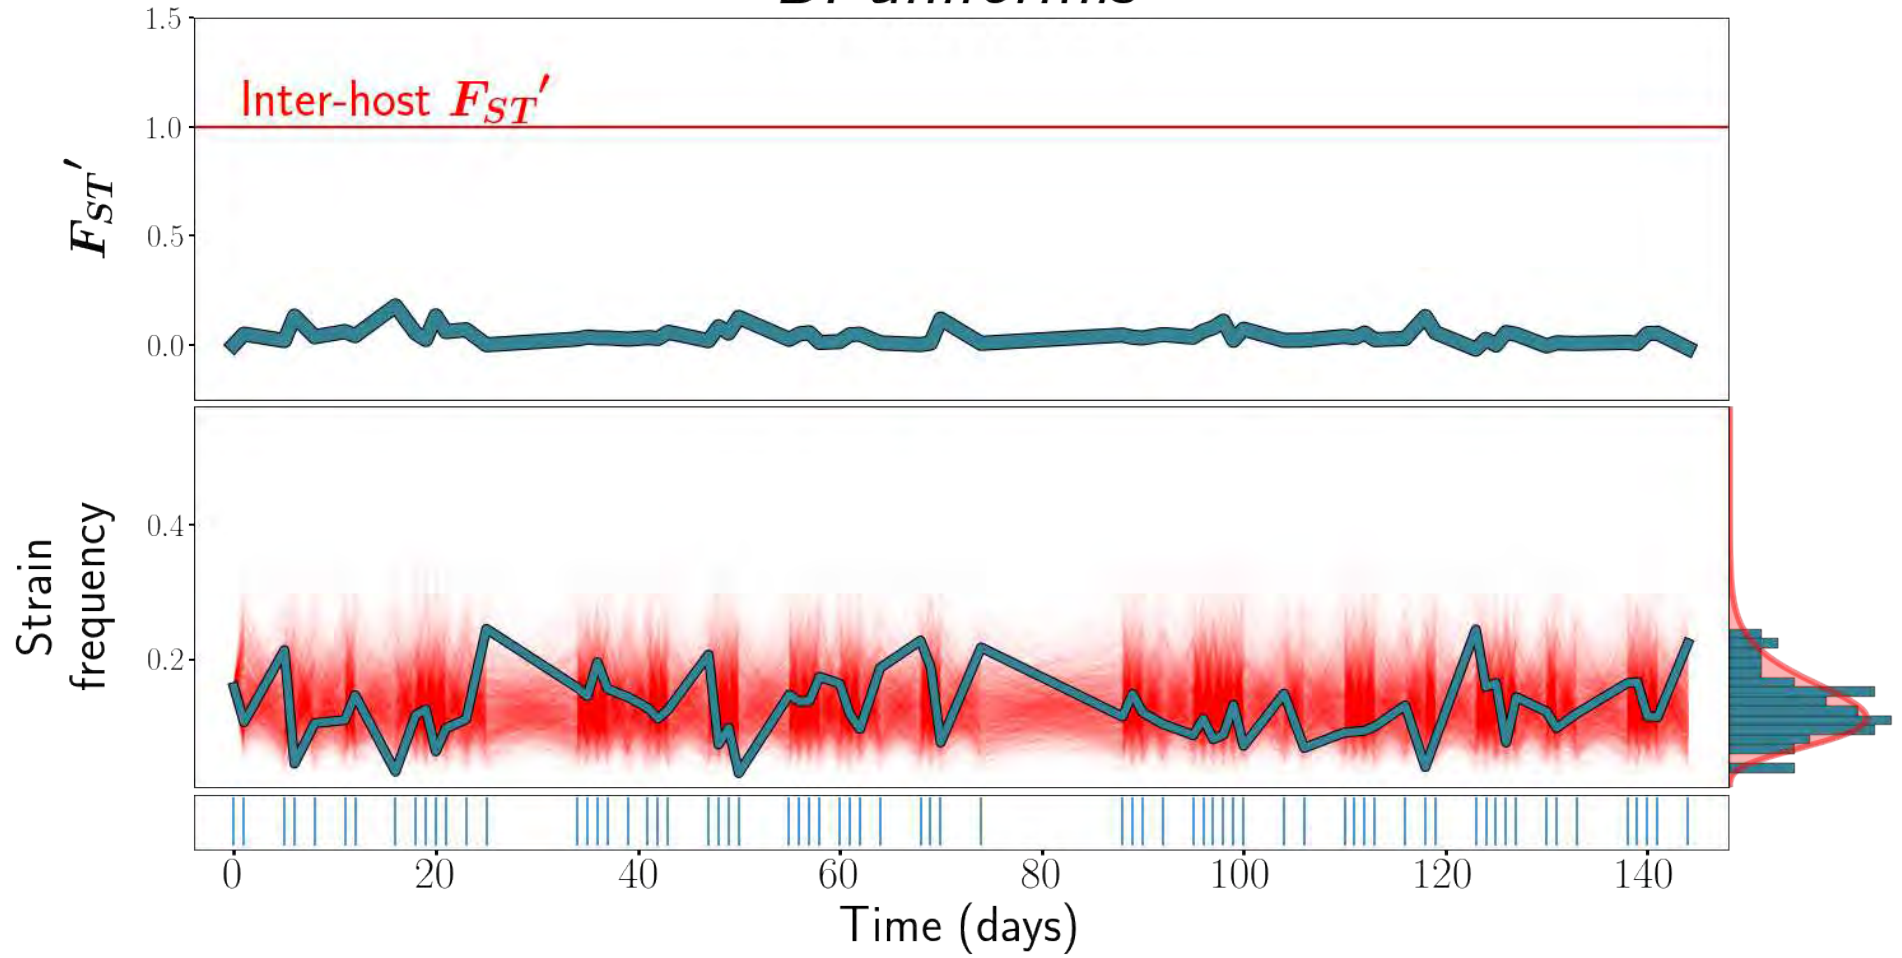

*B. xylanisolvens*

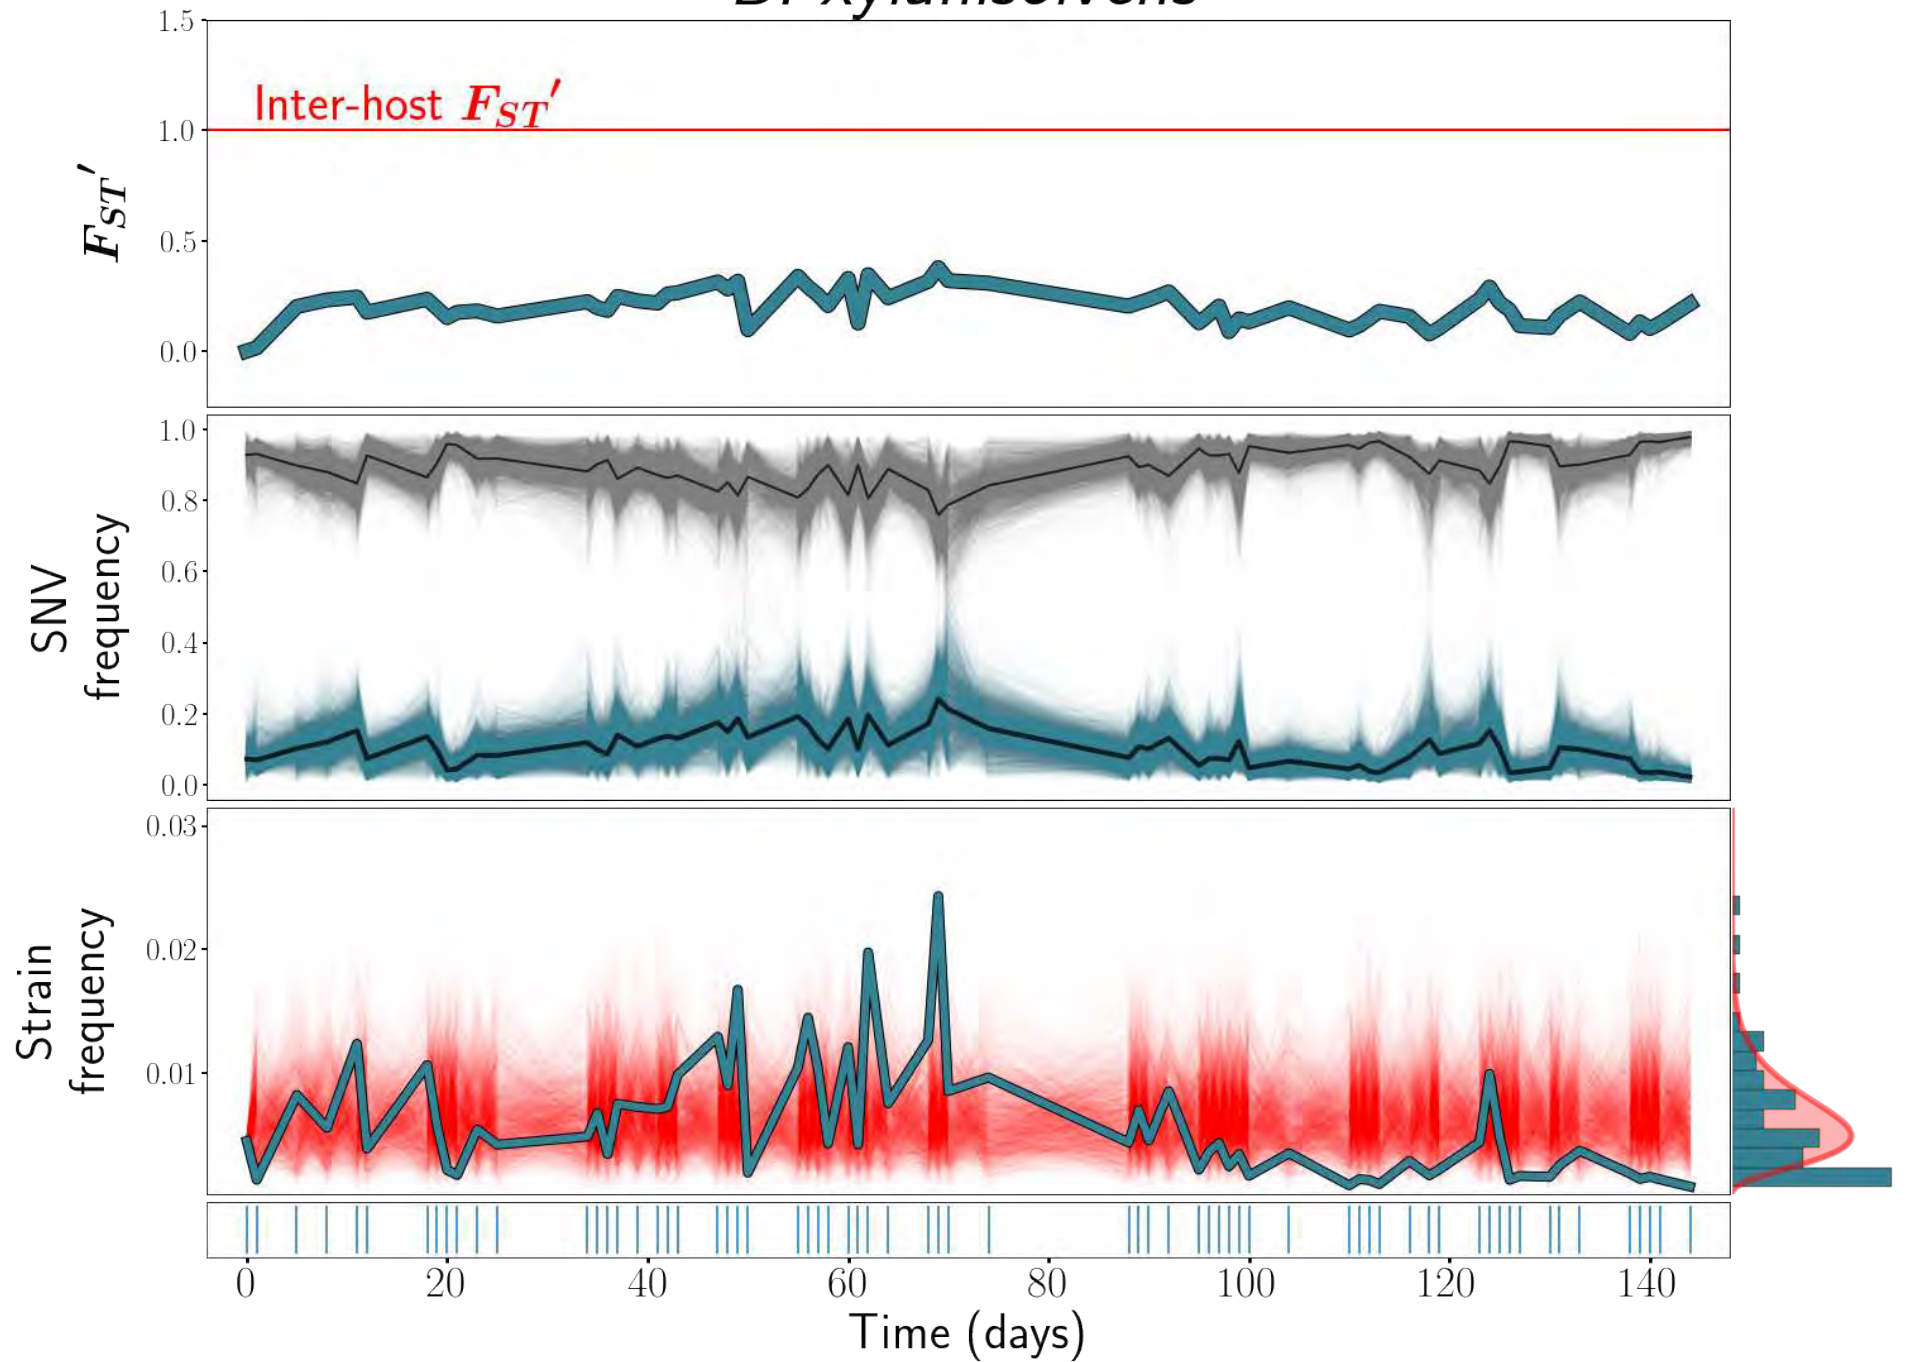

# *B. xylanisolvens*

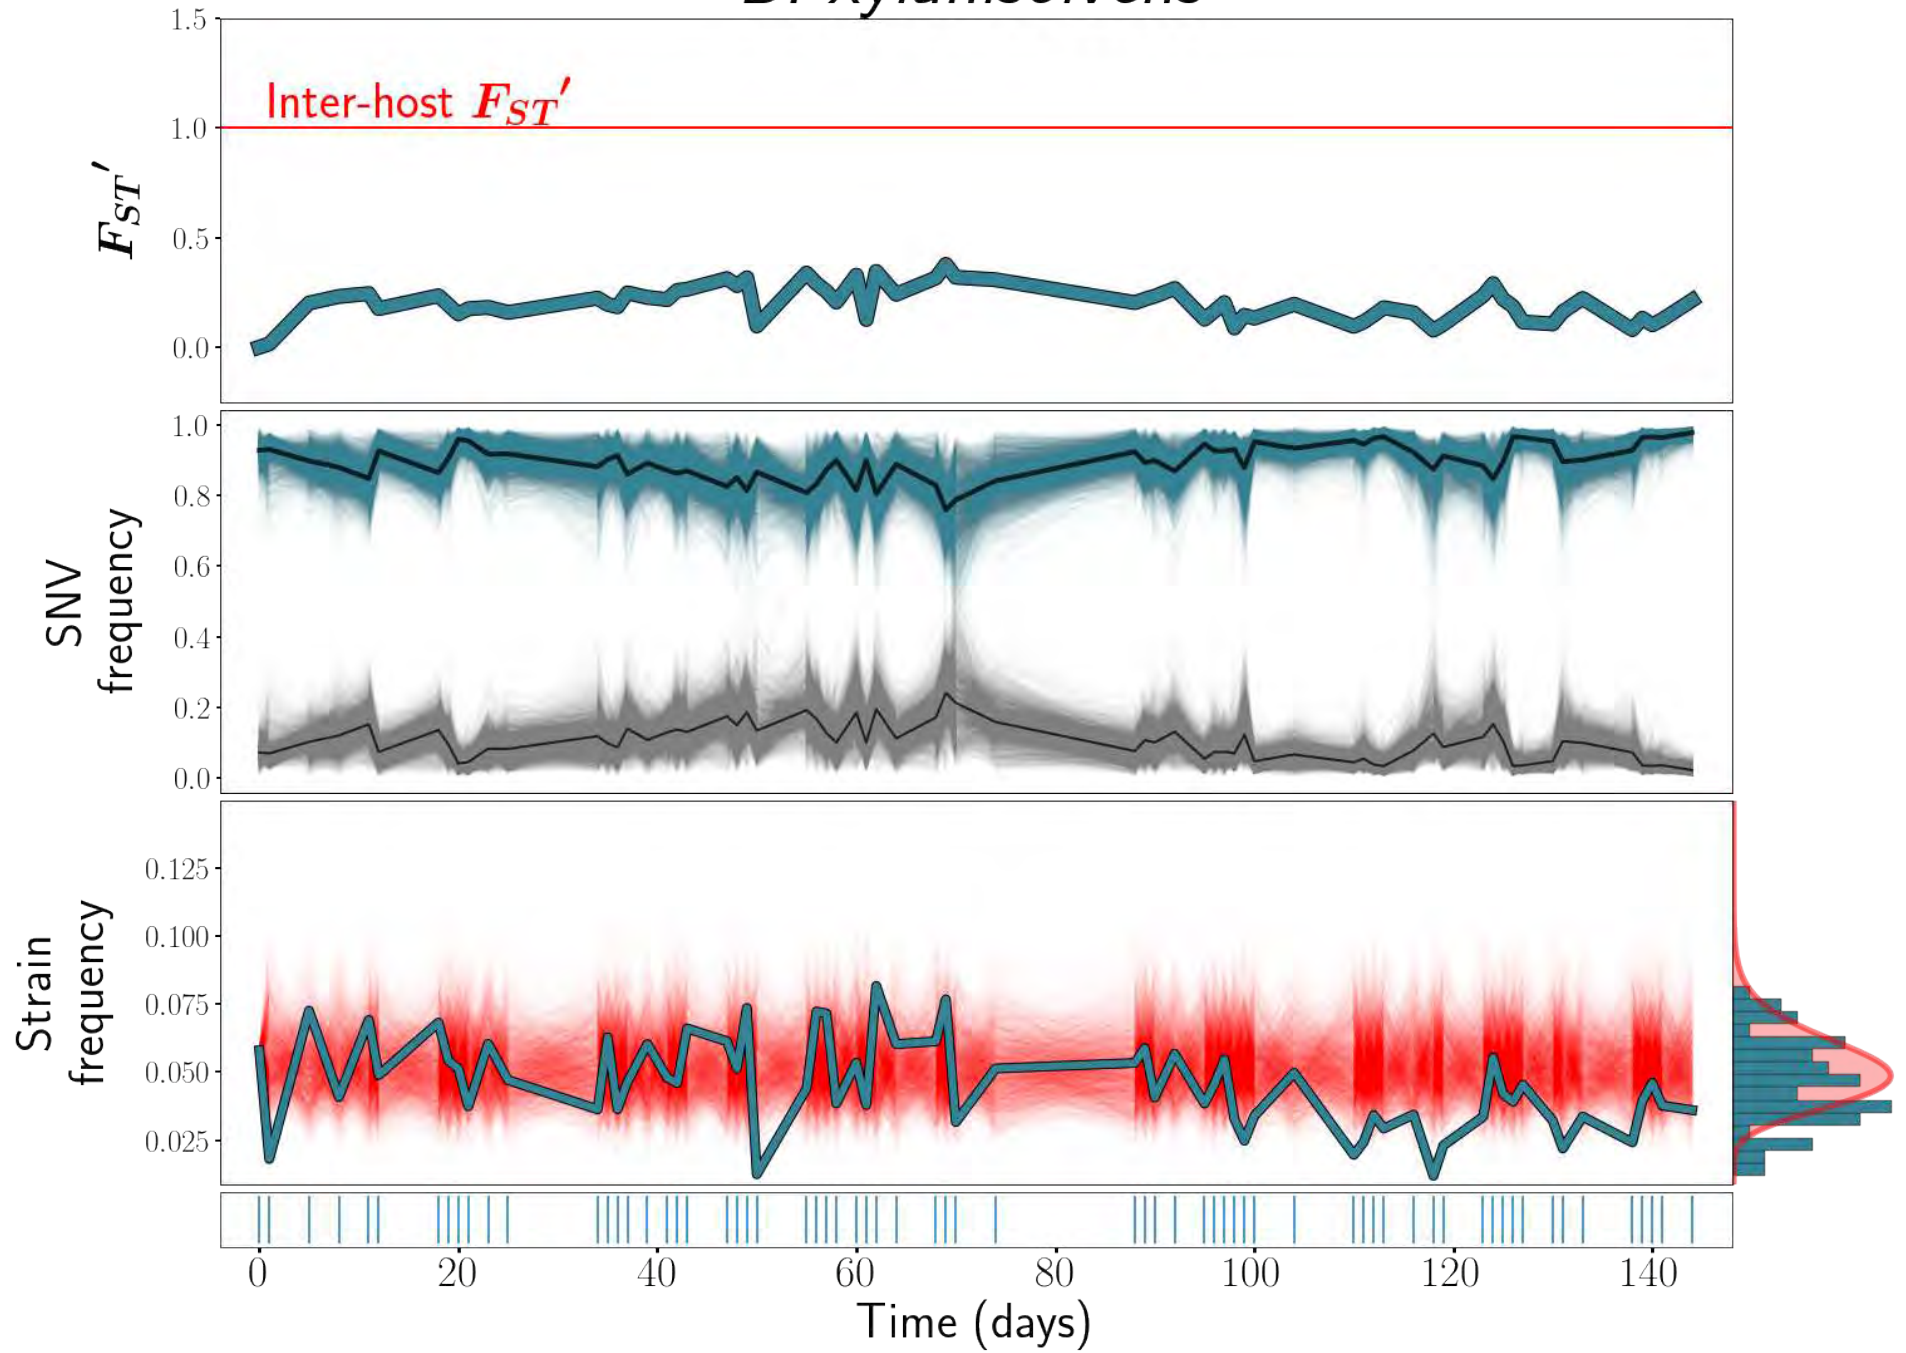

# *B. adolescentis*

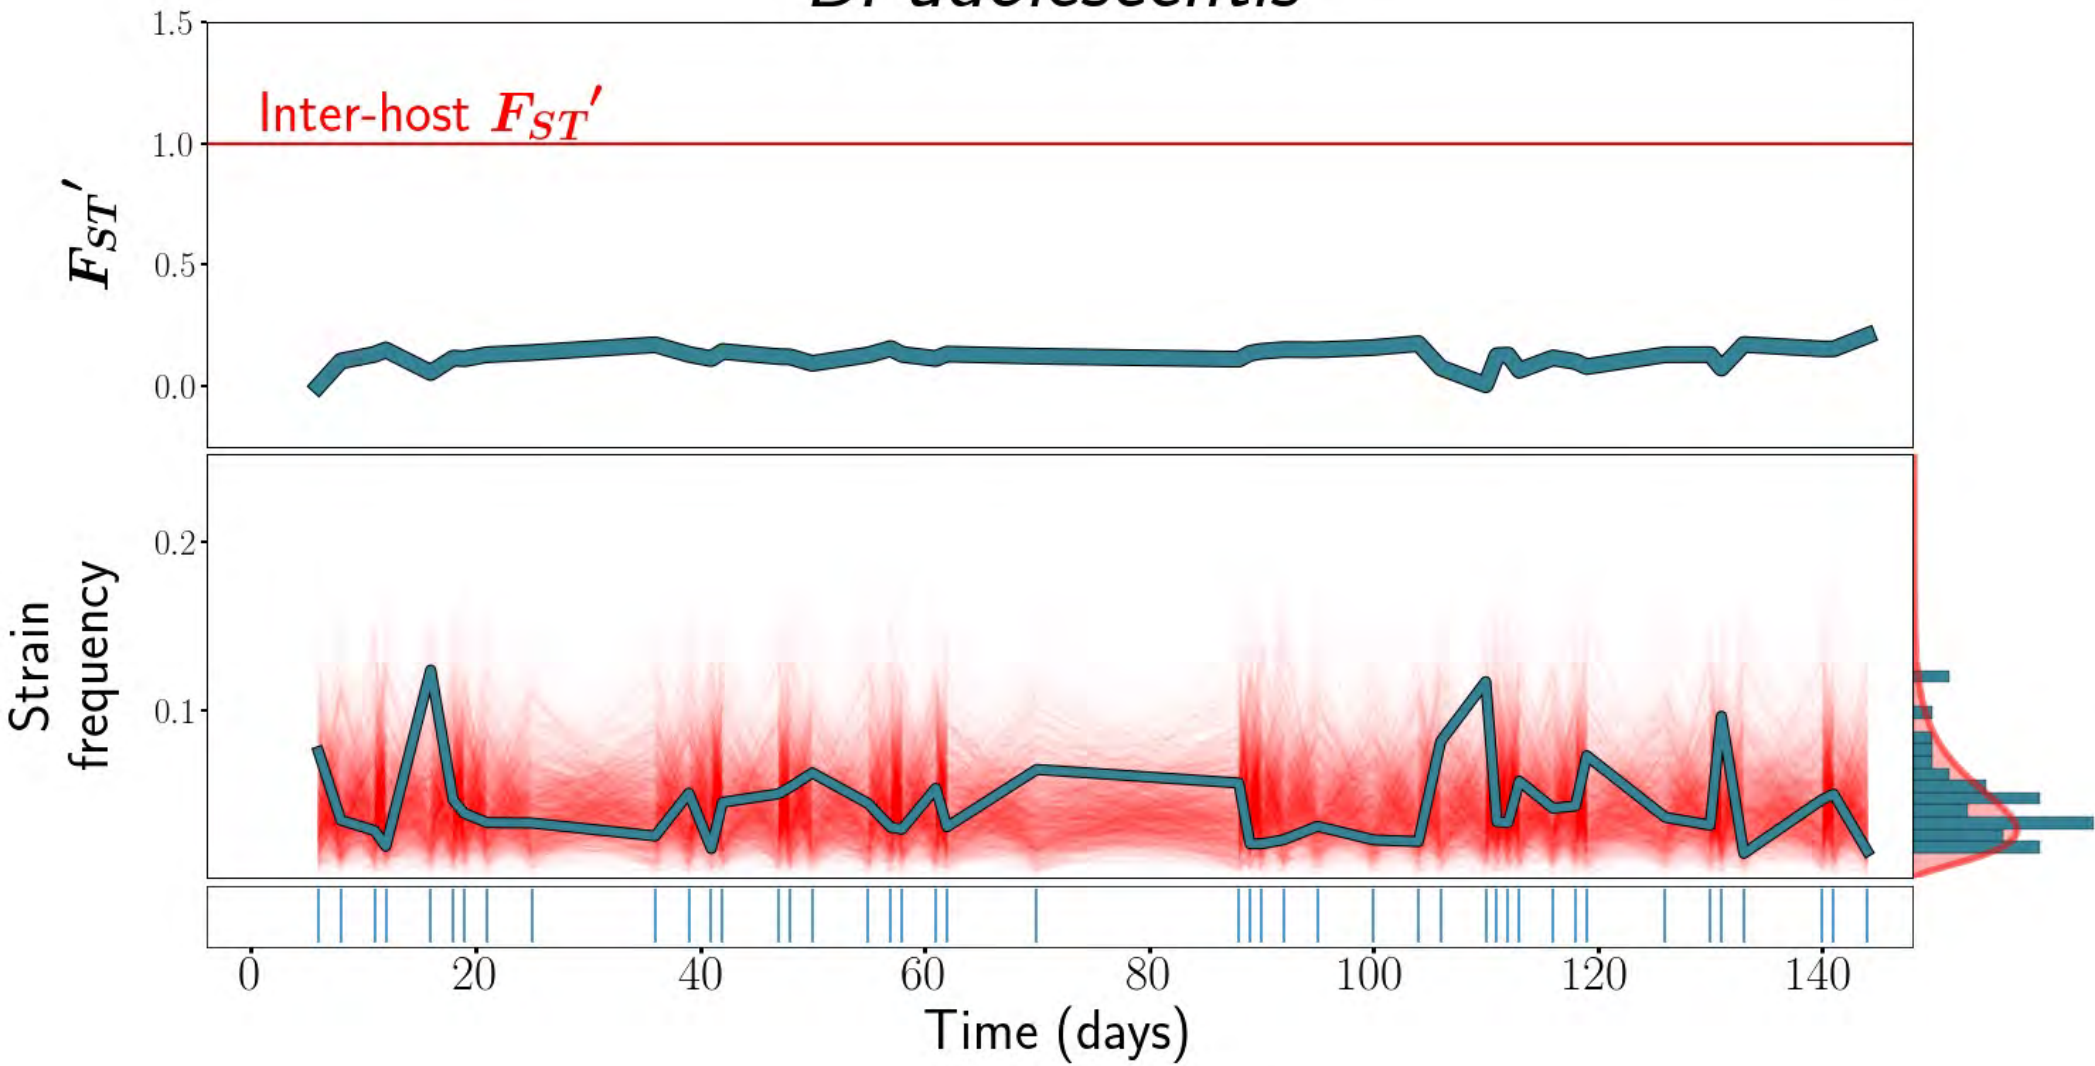



*D. invisus*

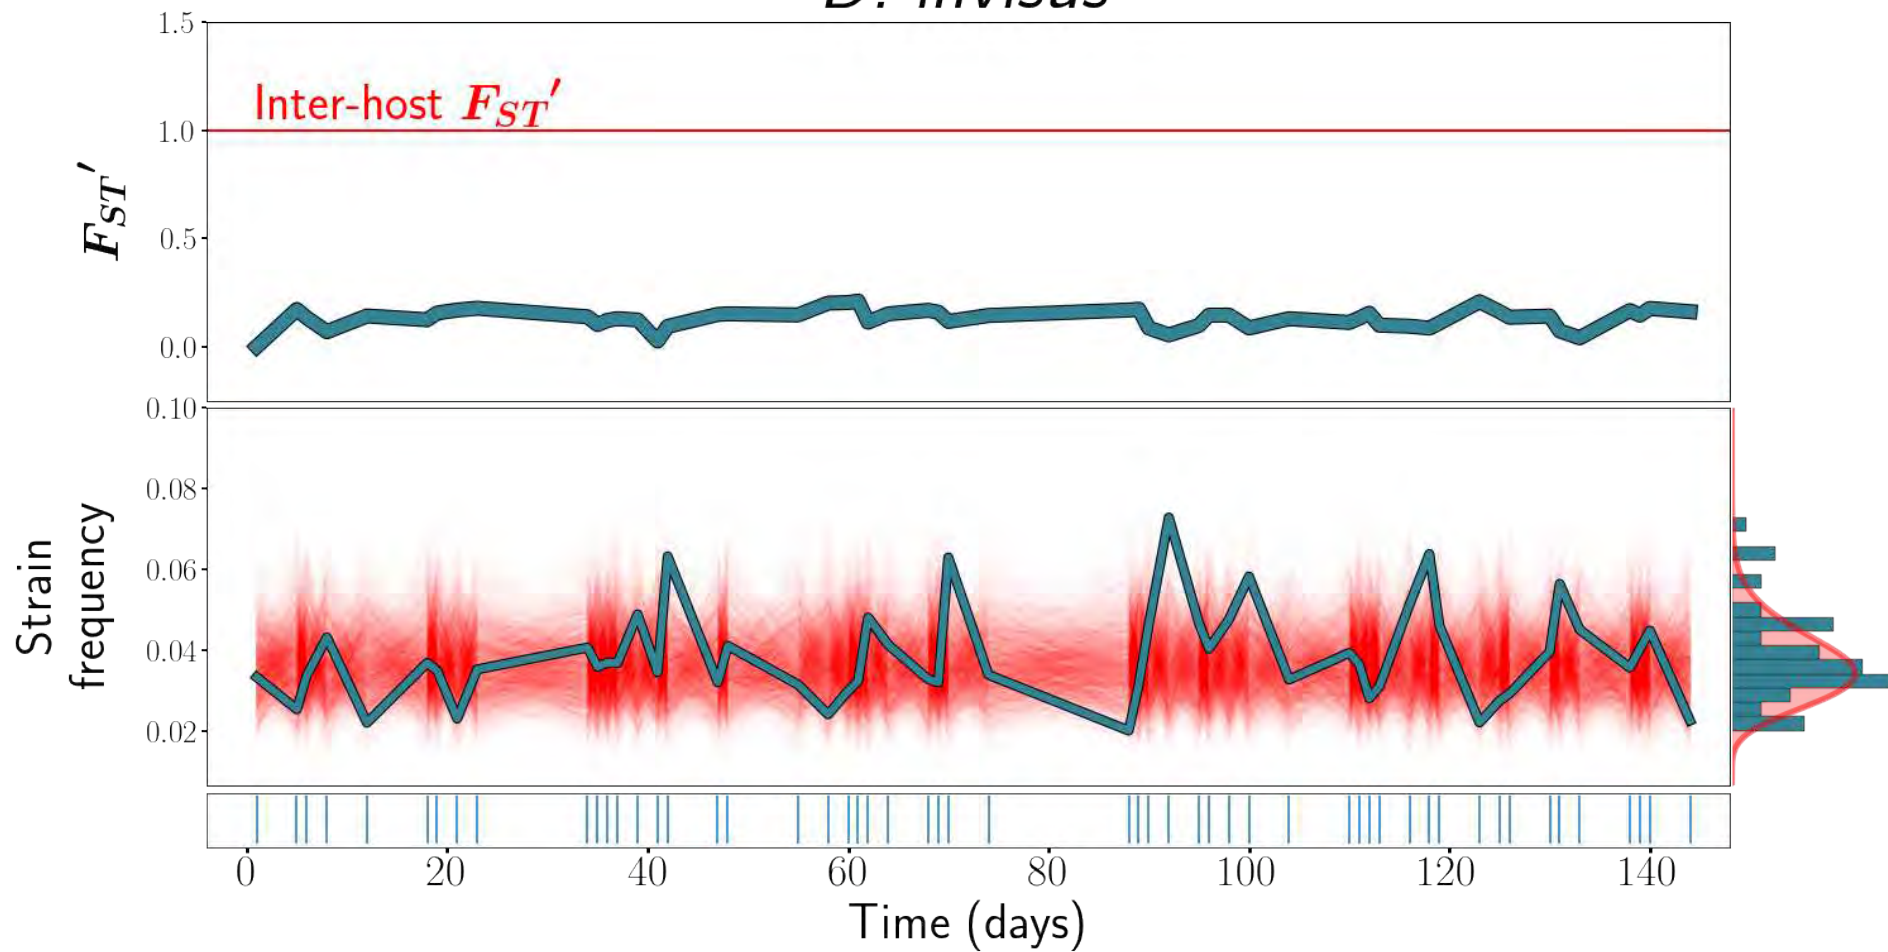

# *E. rectale*

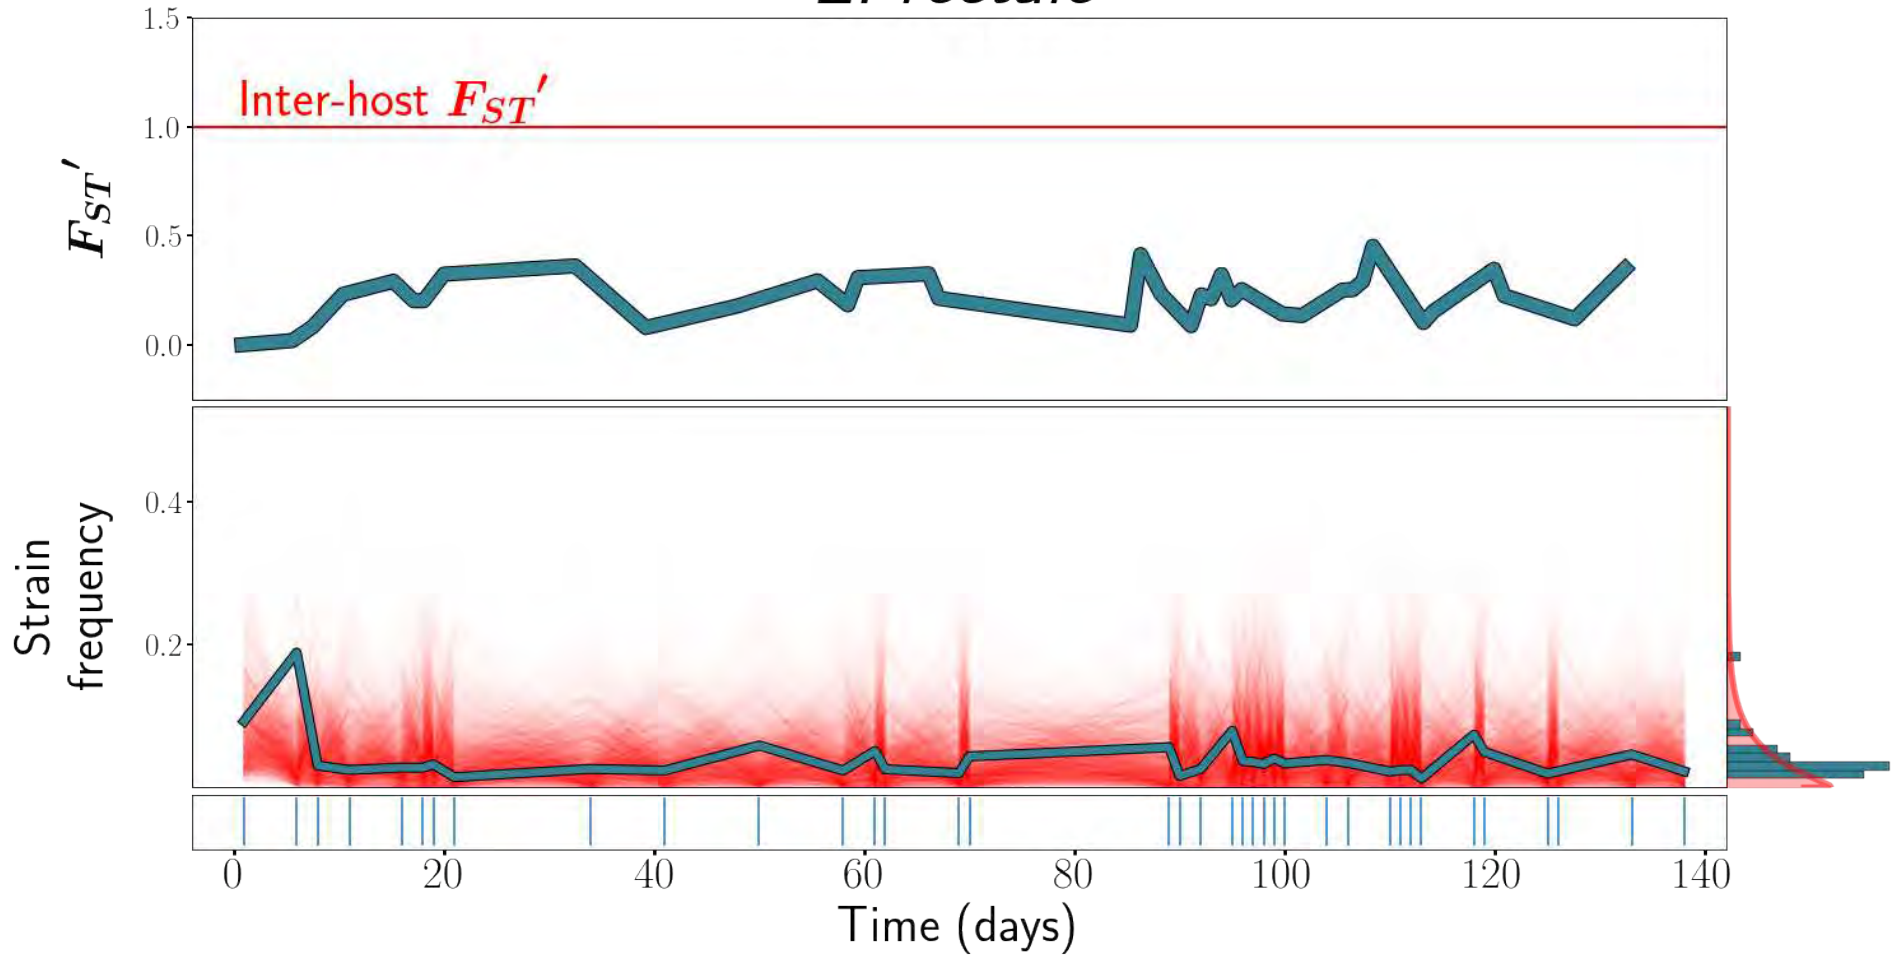

# *Faecalibacterium prausnitzii* (61481)

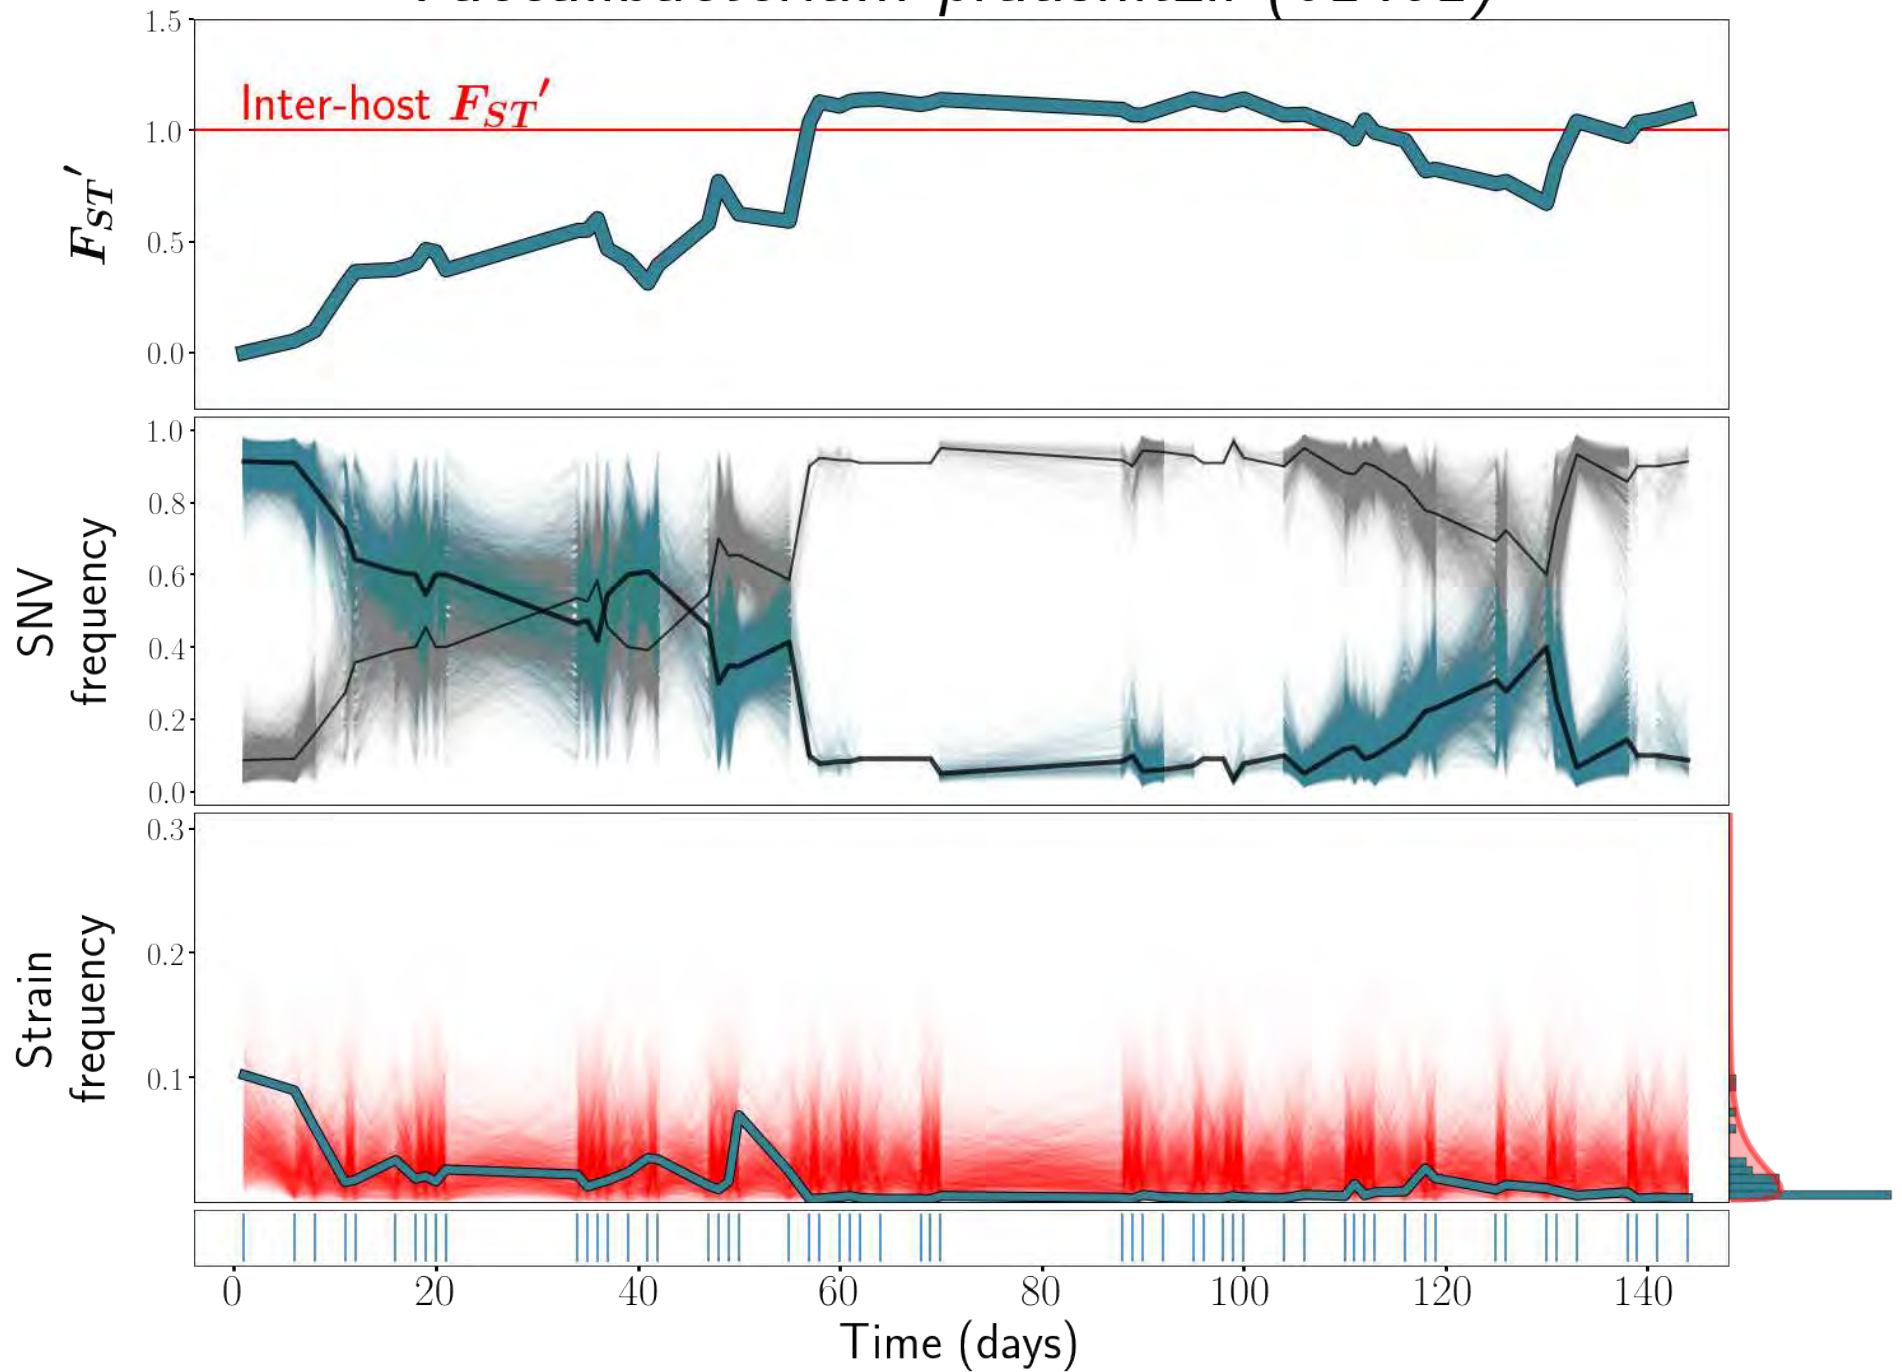

# *Faecalibacterium prausnitzii* (61481)

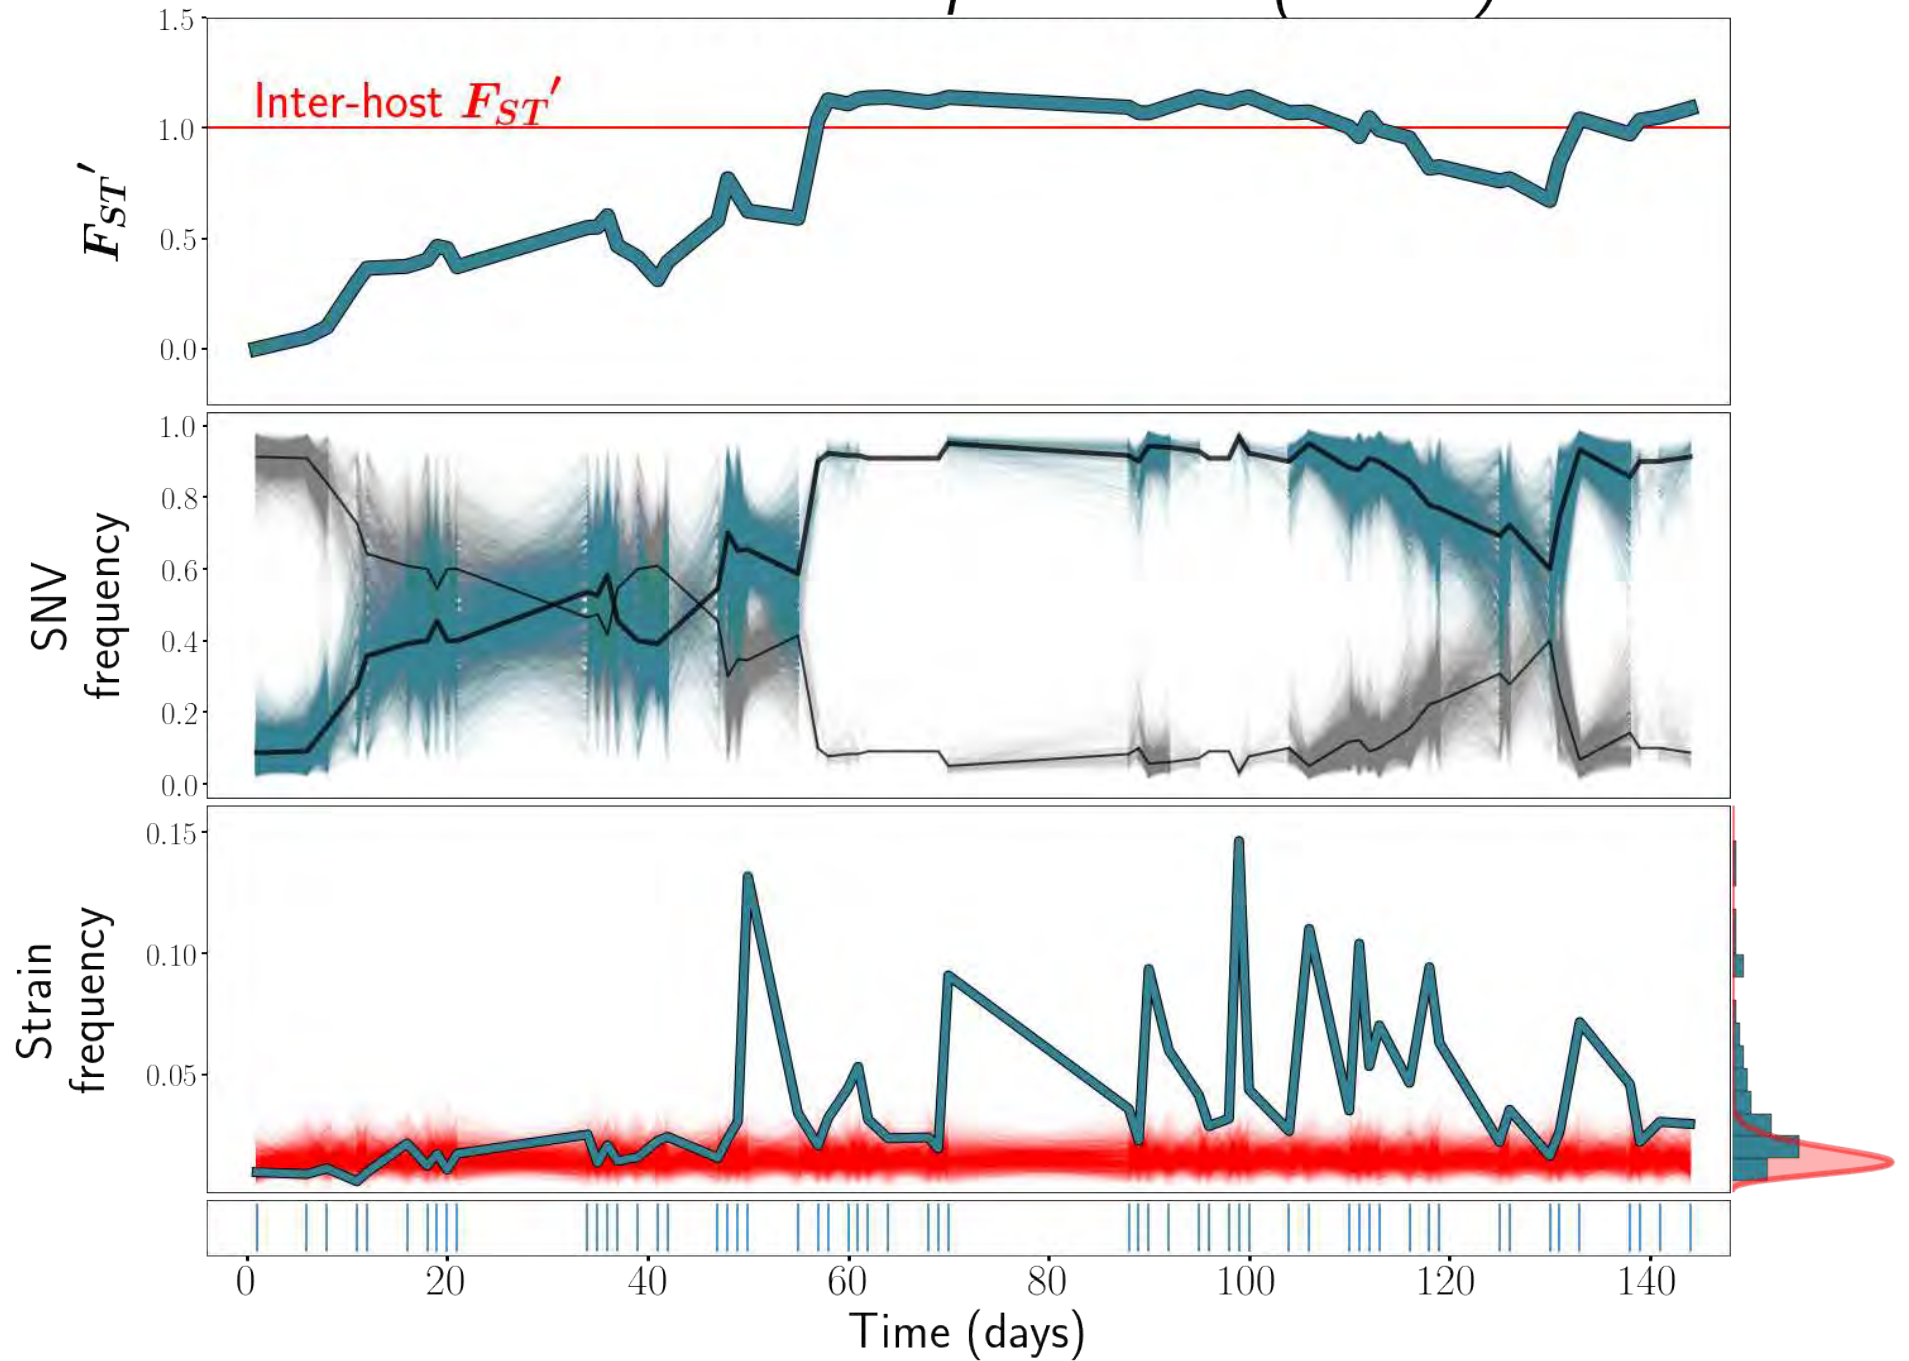

# *Faecalibacterium prausnitzii* (62201)

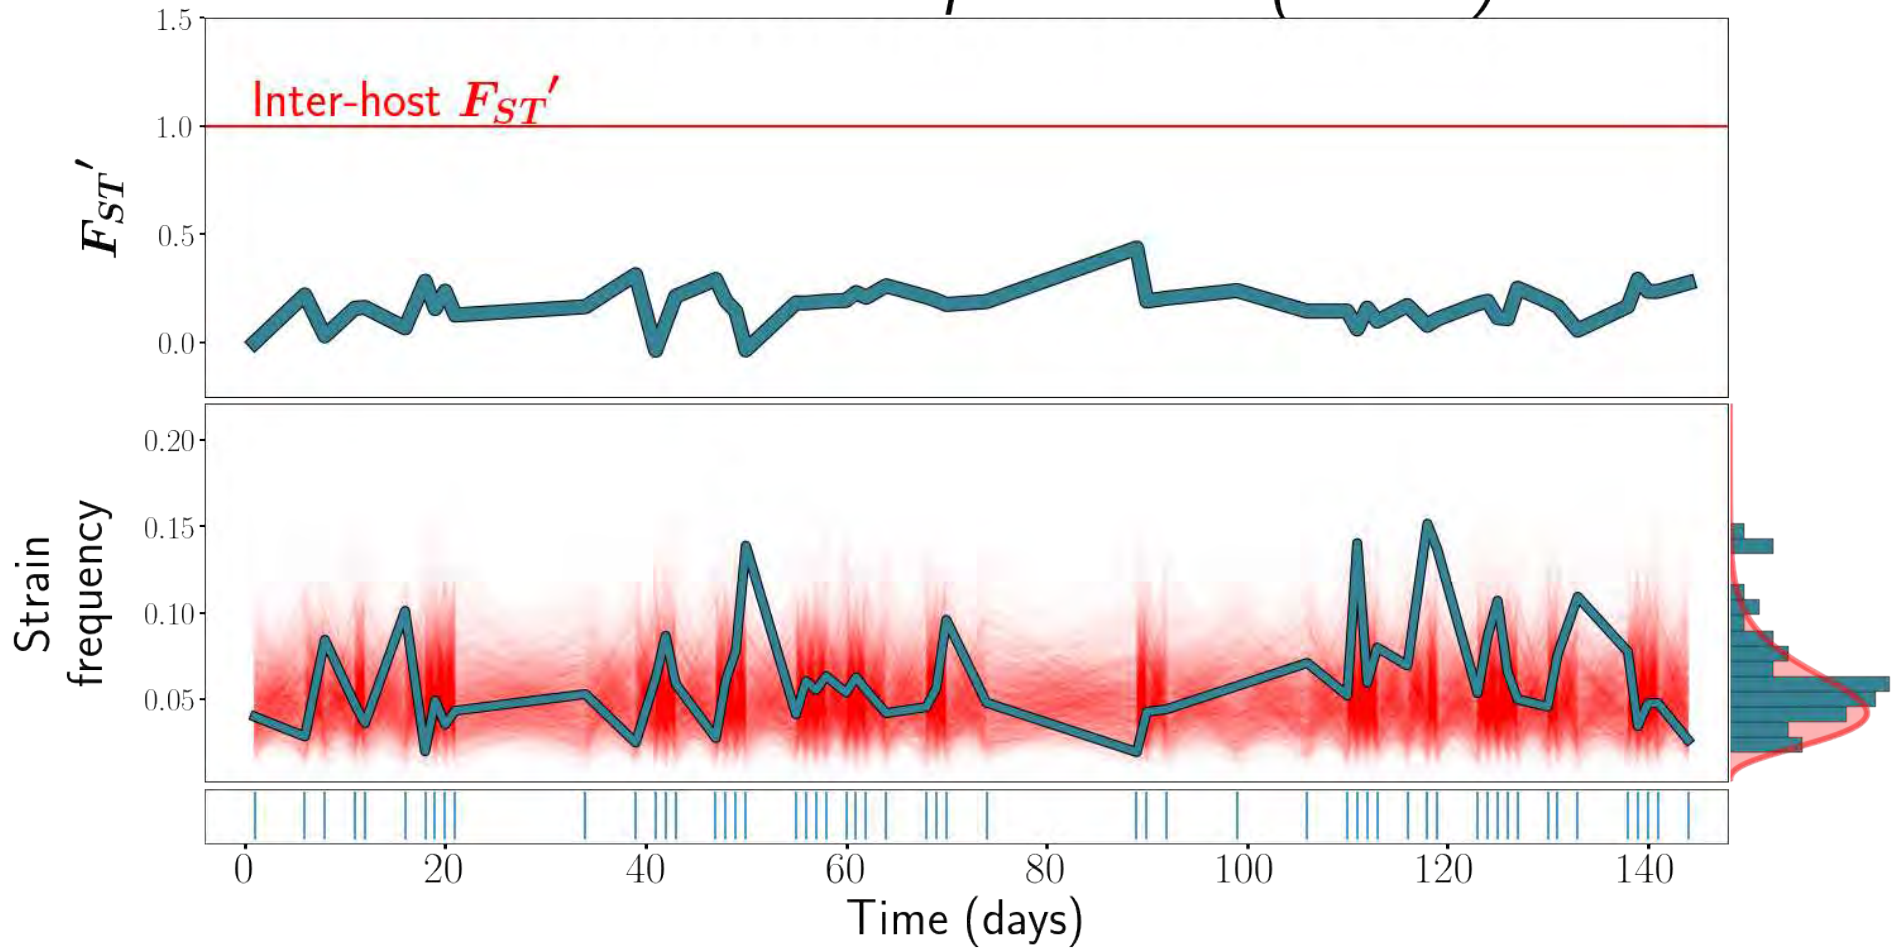

# *L. eligens*

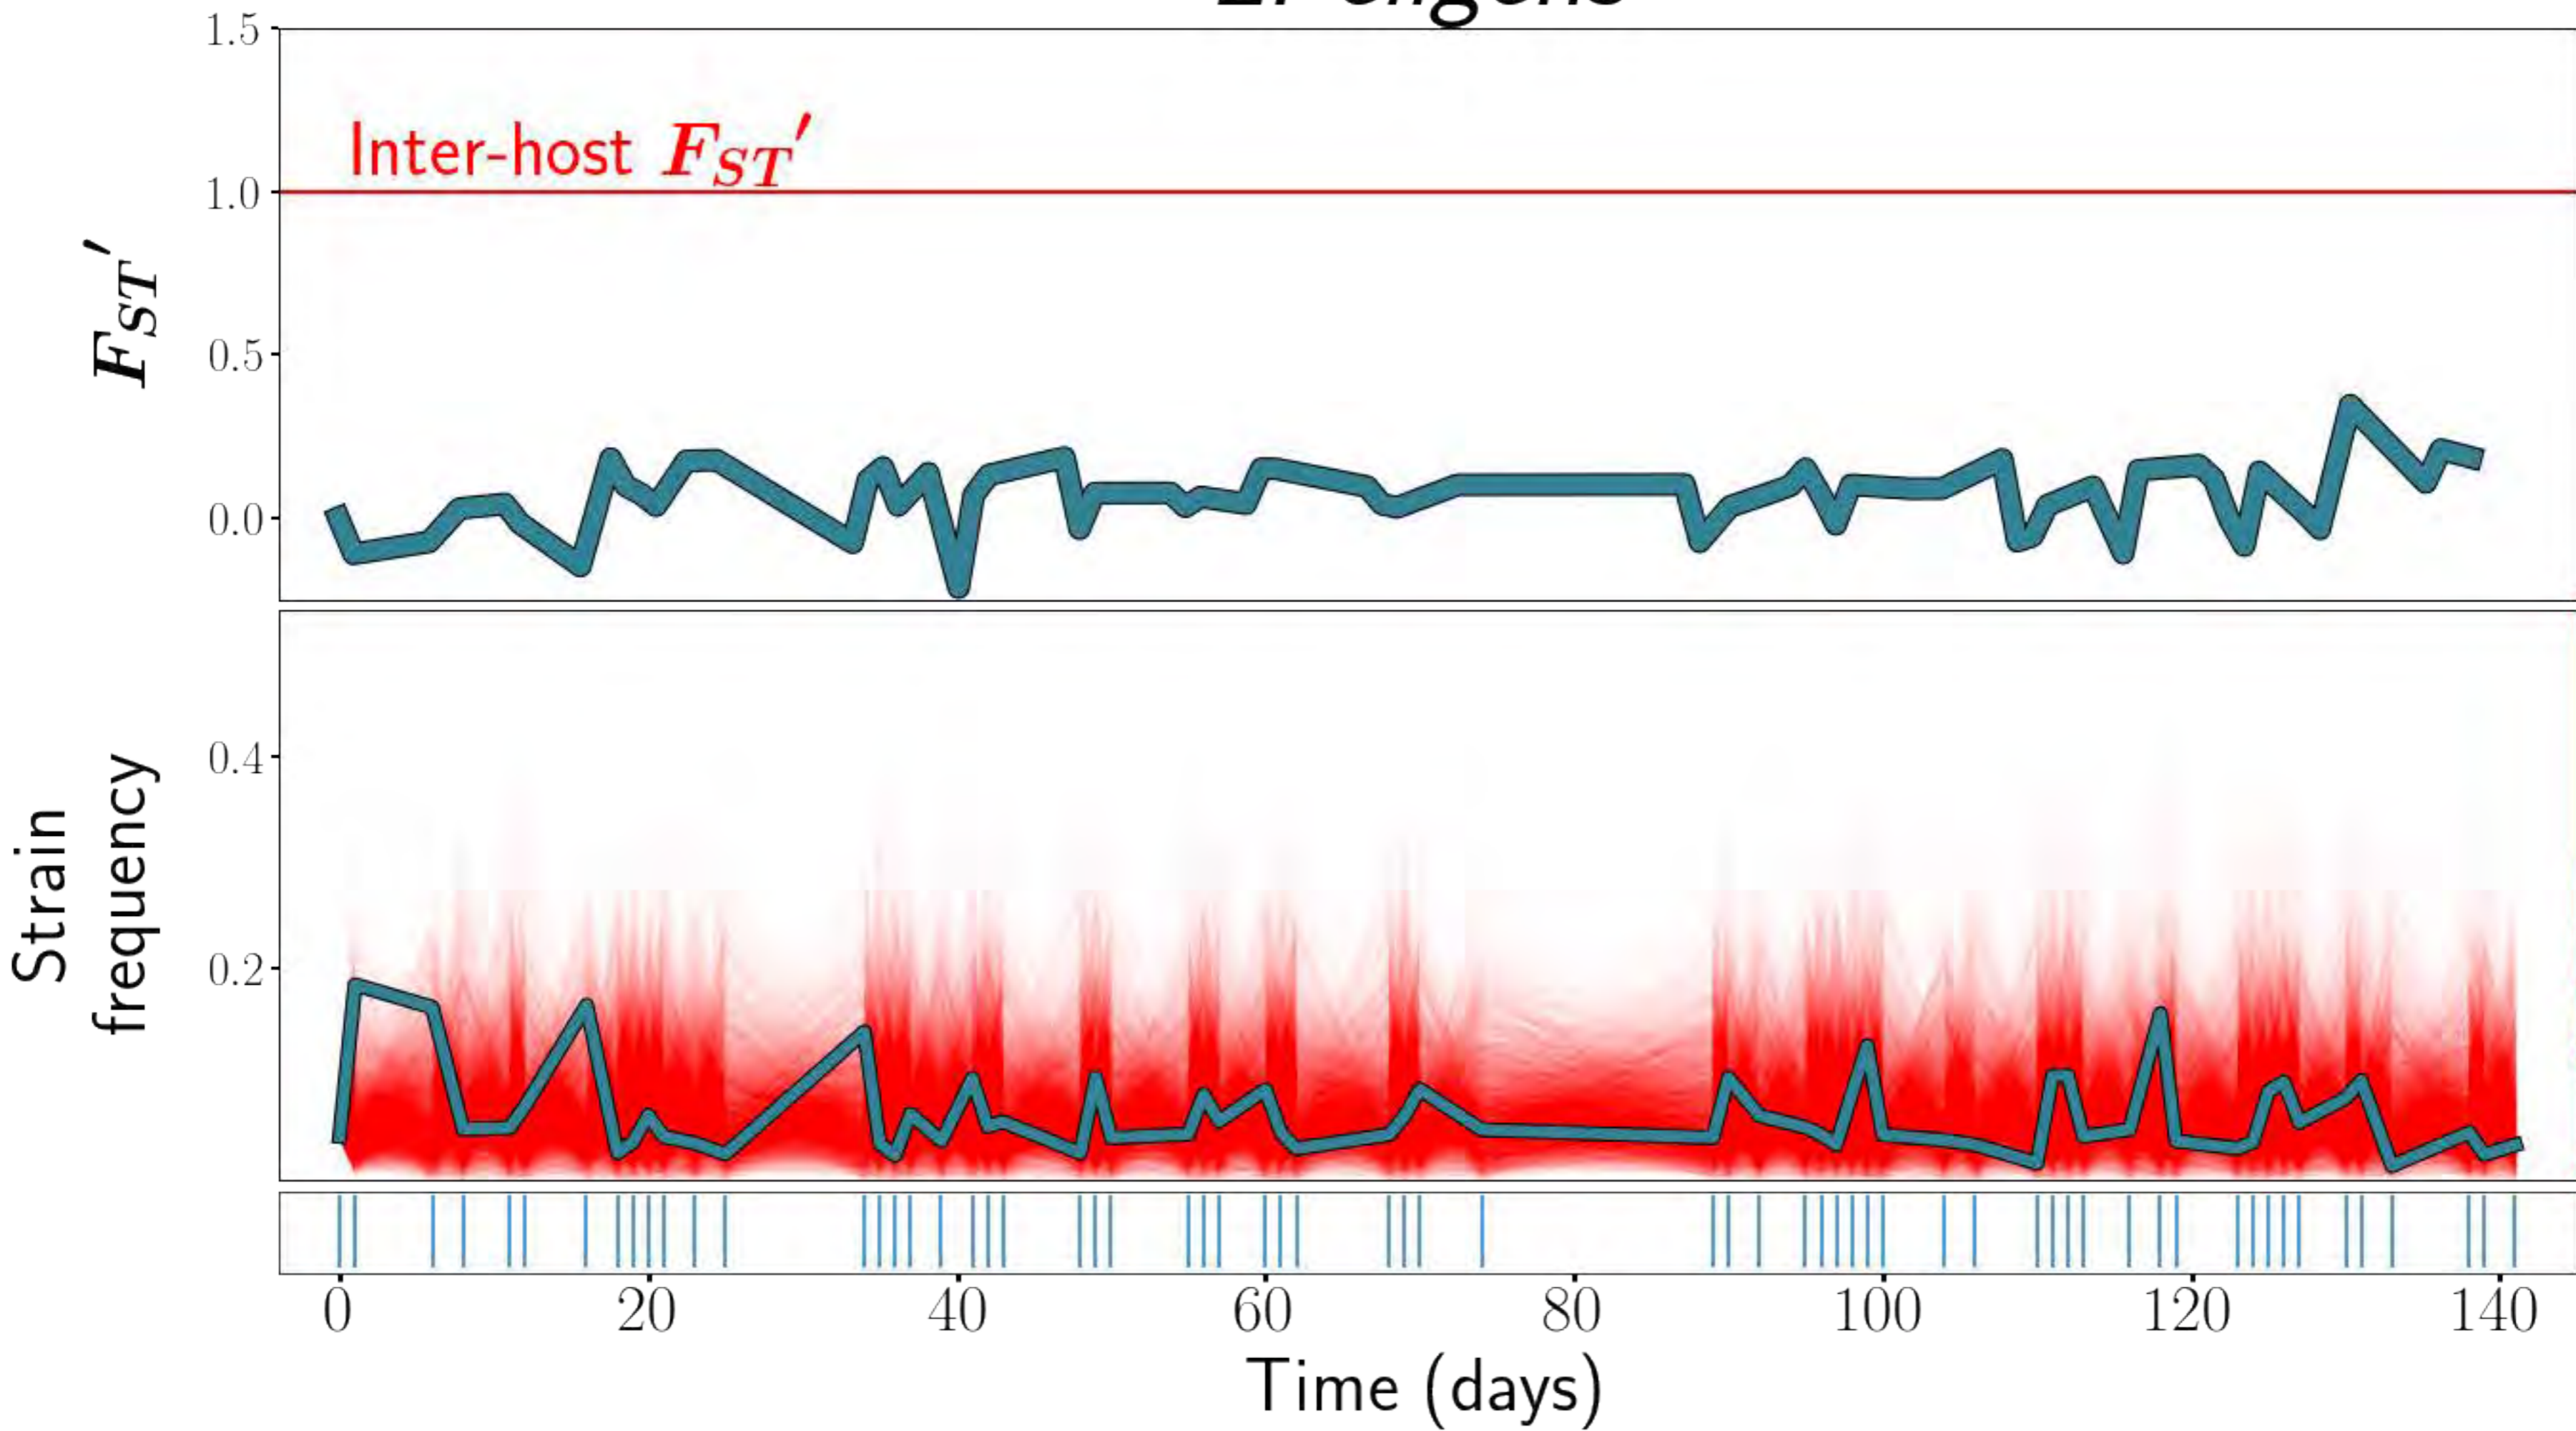

# *R. bicirculans*

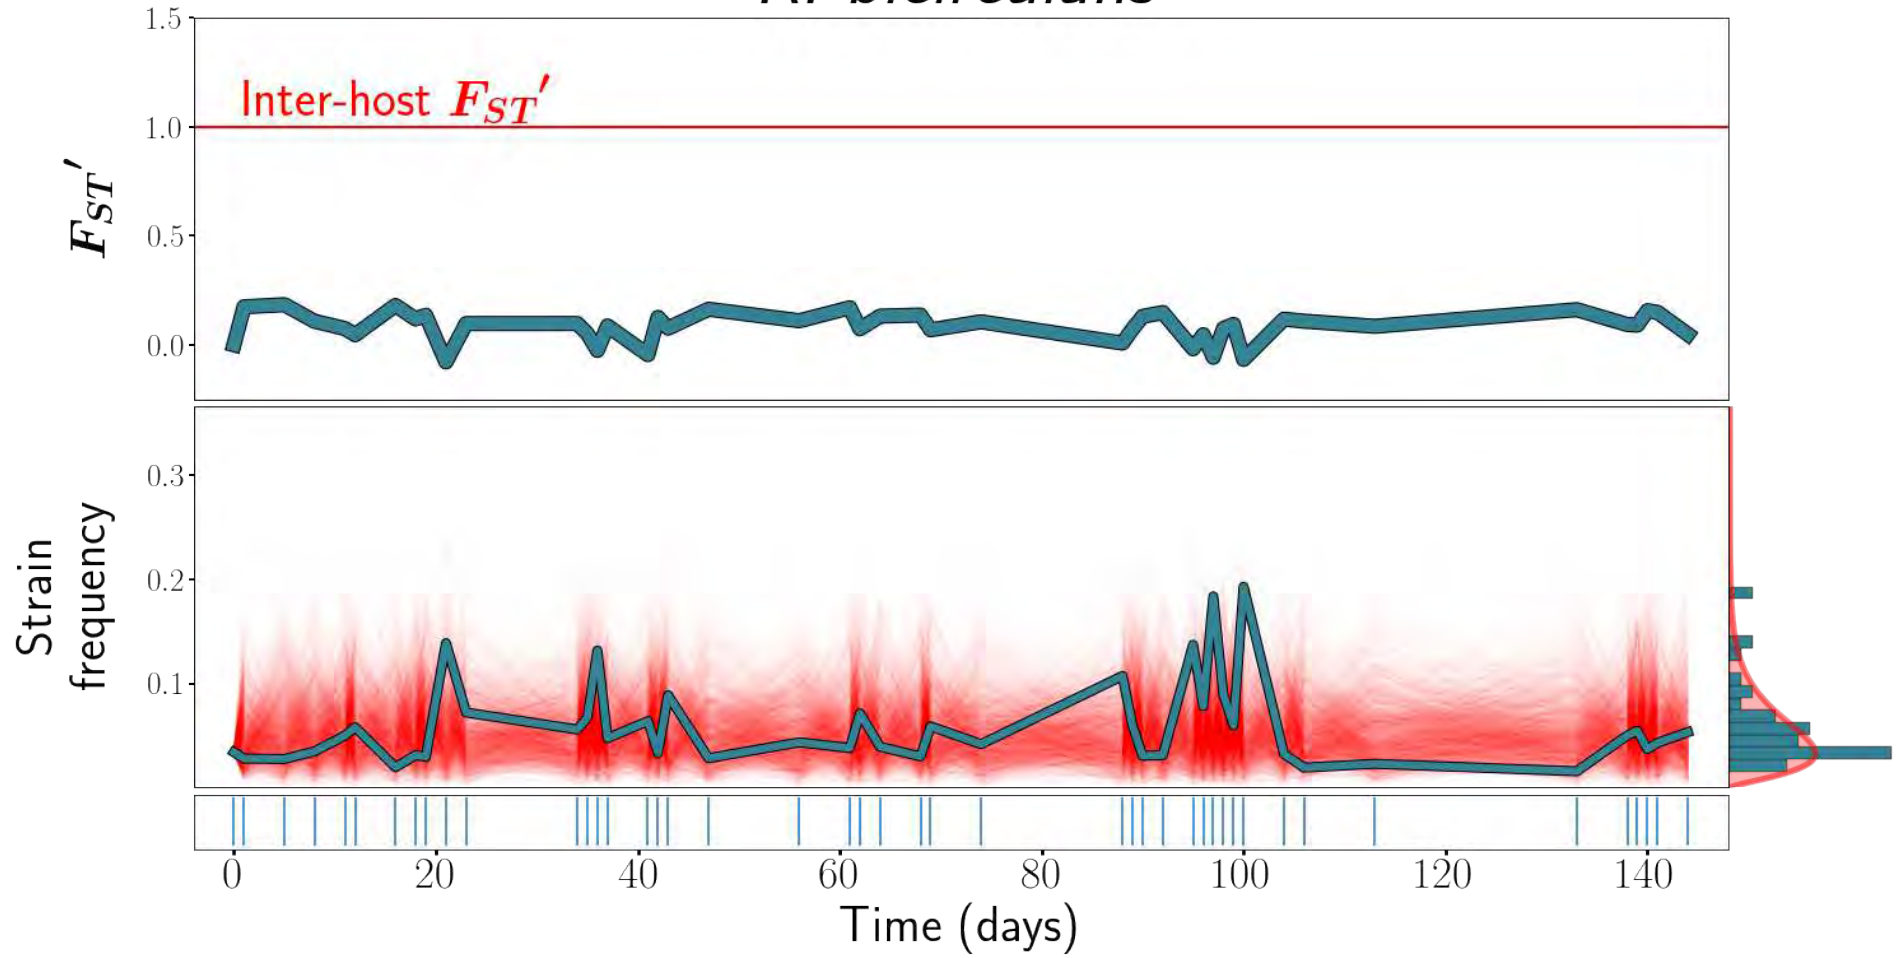

*P. distasonis*

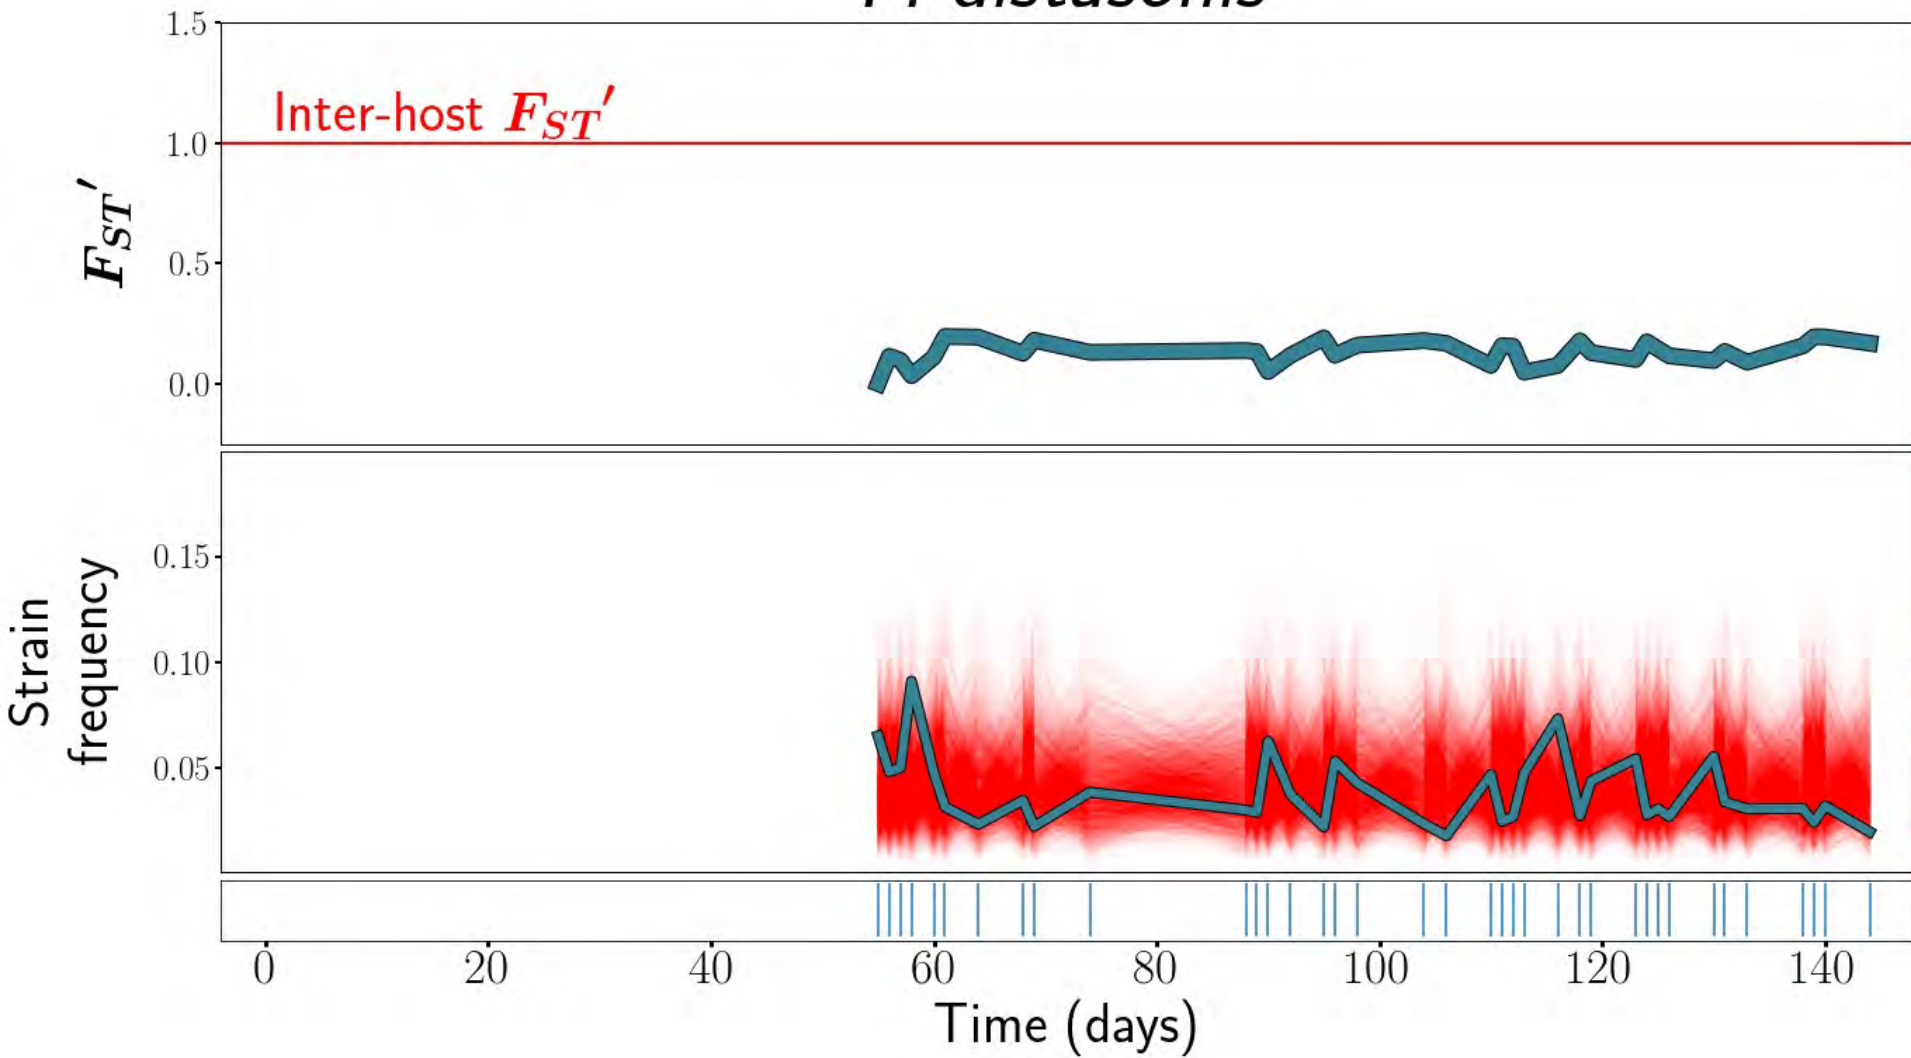

Supplement: mbio.02502-22-s0003.pdf [file mbio.02502-22-s0003.pdf]
