# Supplementary material for: Ecological Stability Emerges at the Level of Strains in the Human Gut Microbiome
Source: PubMed Central journal article supplement (PMC10127601; doi:10.1128/mbio.02502-22), 2023-02-21

# S4 Text

$F_{ST}$ , strain frequency, and strain abundance dynamics plots for all species analyzed, for host *an*. These plots are analogous to Main Text Figure 1. When only a single strain was detected, only  $F_{ST}$  and strain abundance dynamics plots, but no strain frequency plot, is included.

## *Table of contents*

|                                      |    |
|--------------------------------------|----|
| <i>Alistipes putredinis A</i>        | 1  |
| <i>Bacteroides clarus A</i>          | 2  |
| <i>Bacteroides uniformis A</i>       | 3  |
| <i>Bacteroides uniformis B</i>       | 4  |
| <i>Bacteroides xylanisolvens A</i>   | 5  |
| <i>Barnesiella intestinhominis A</i> | 6  |
| <i>Eubacterium rectale A</i>         | 7  |
| <i>Eubacterium rectale B</i>         | 8  |
| <i>Paraprevotella clara A</i>        | 9  |
| <i>Phocaeicola massilensis A</i>     | 10 |
| <i>Phocaeicola vulgatus A</i>        | 11 |
| <i>Phocaeicola vulgatus B</i>        | 12 |
| <i>Phocaeicola vulgatus C</i>        | 13 |
| <i>Ruminococcus bromii A</i>         | 14 |
| <i>Sutterella wadsworthensis A</i>   | 15 |
| <i>Sutterella wadsworthensis B</i>   | 16 |

*A. putredinis*

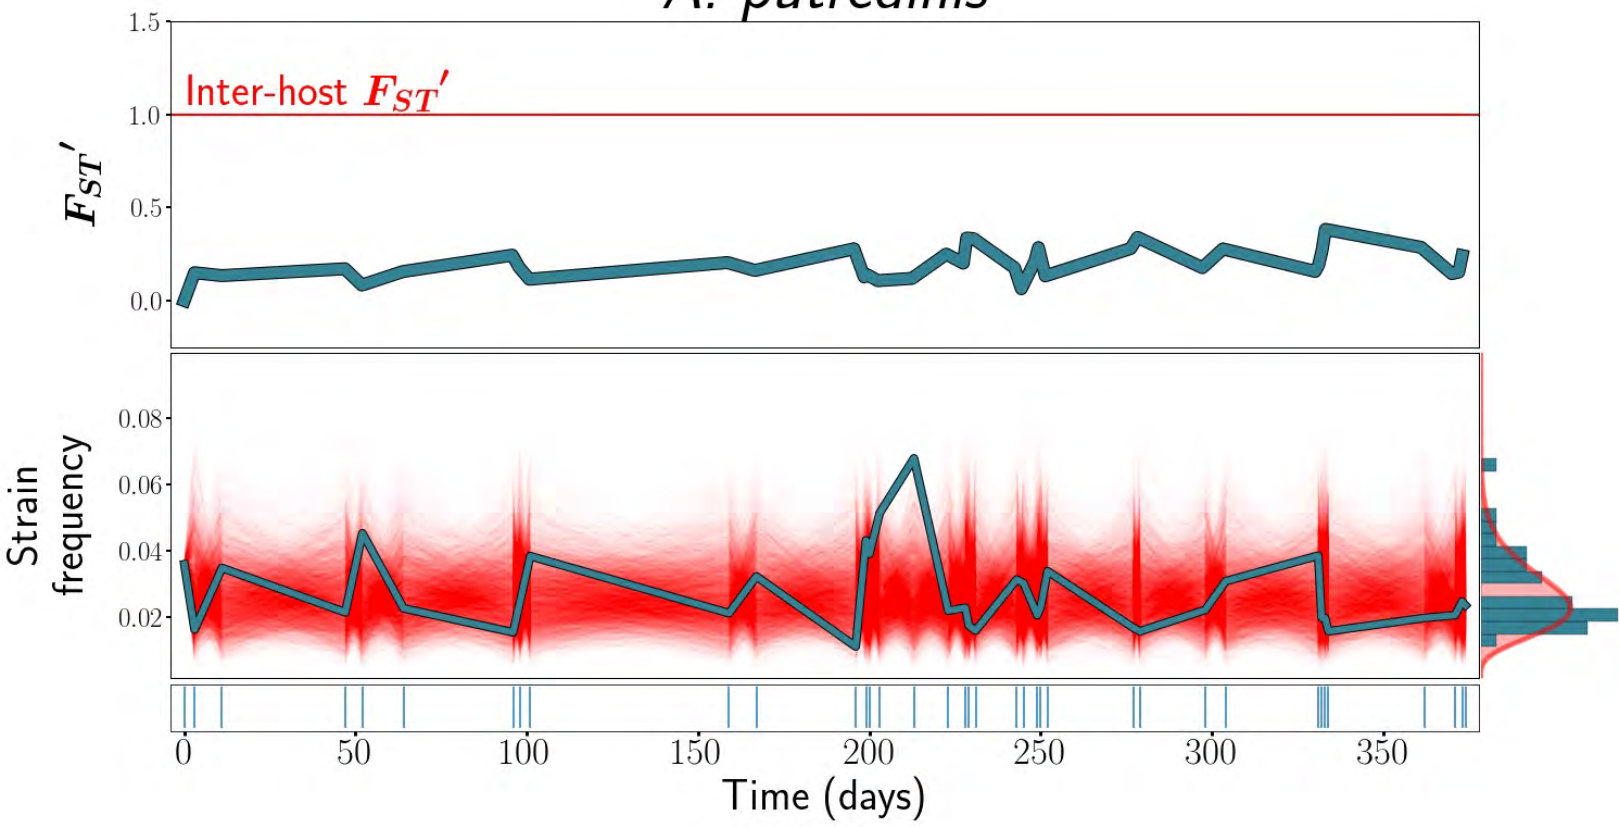

*B. clarus*

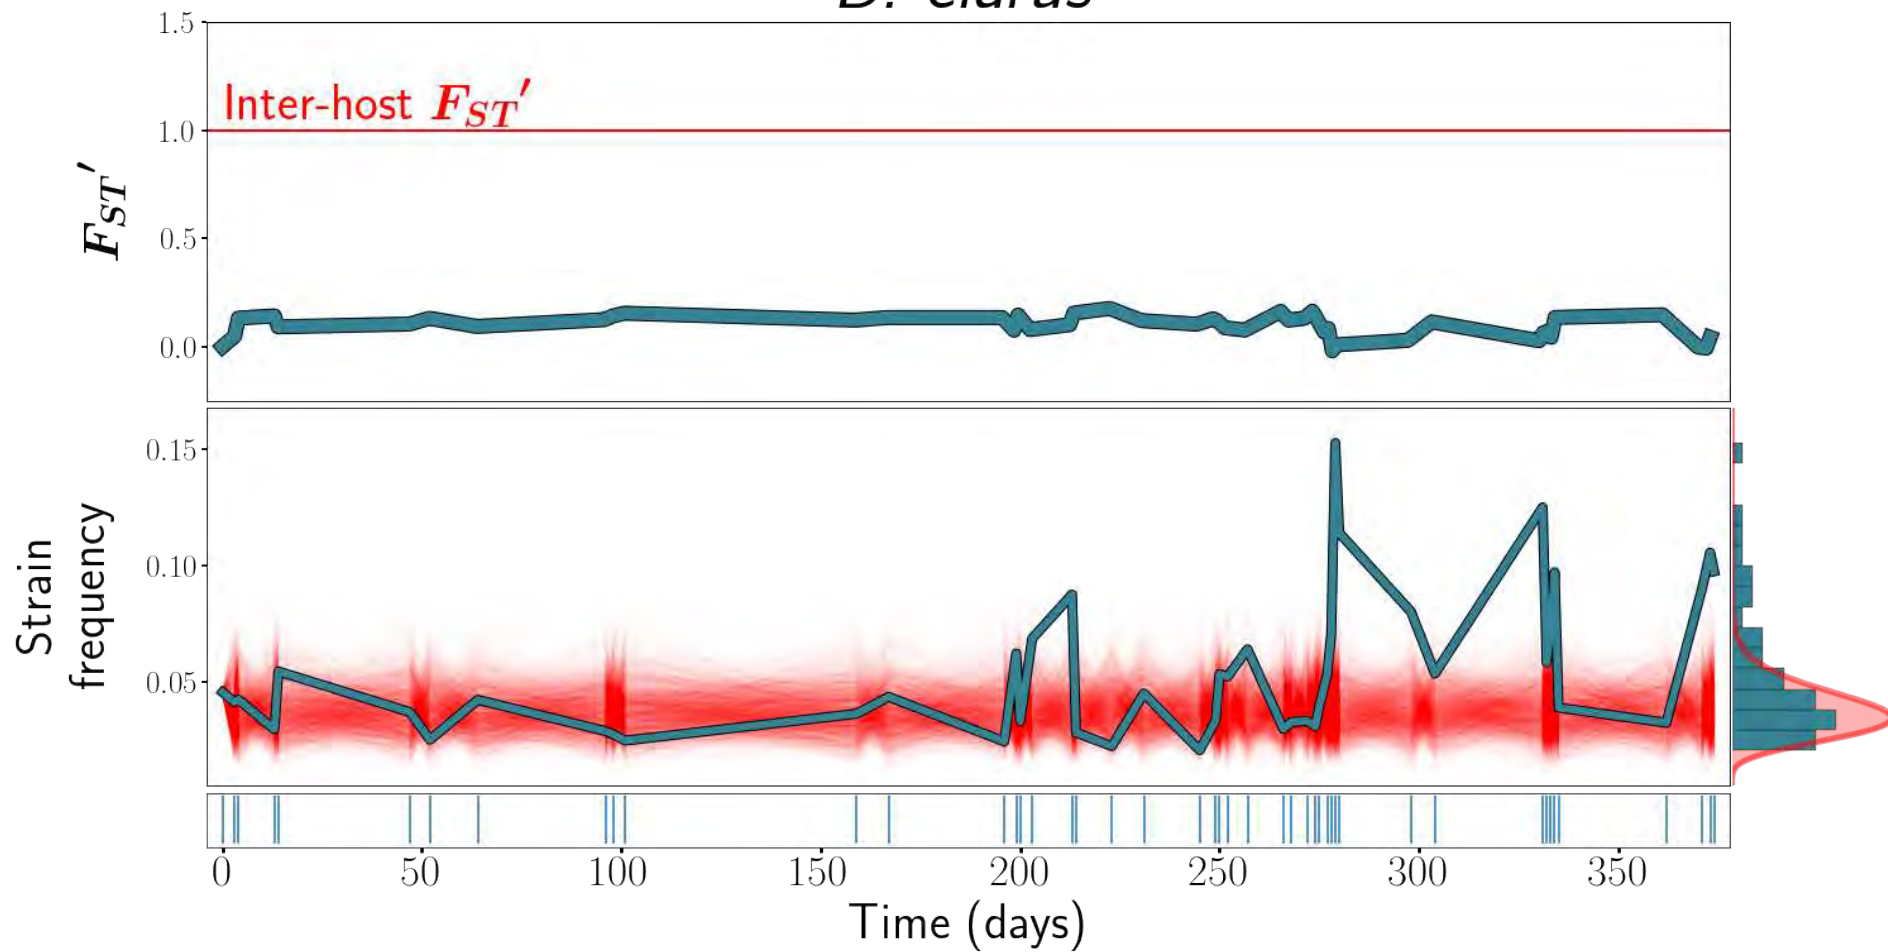

*B. uniformis*

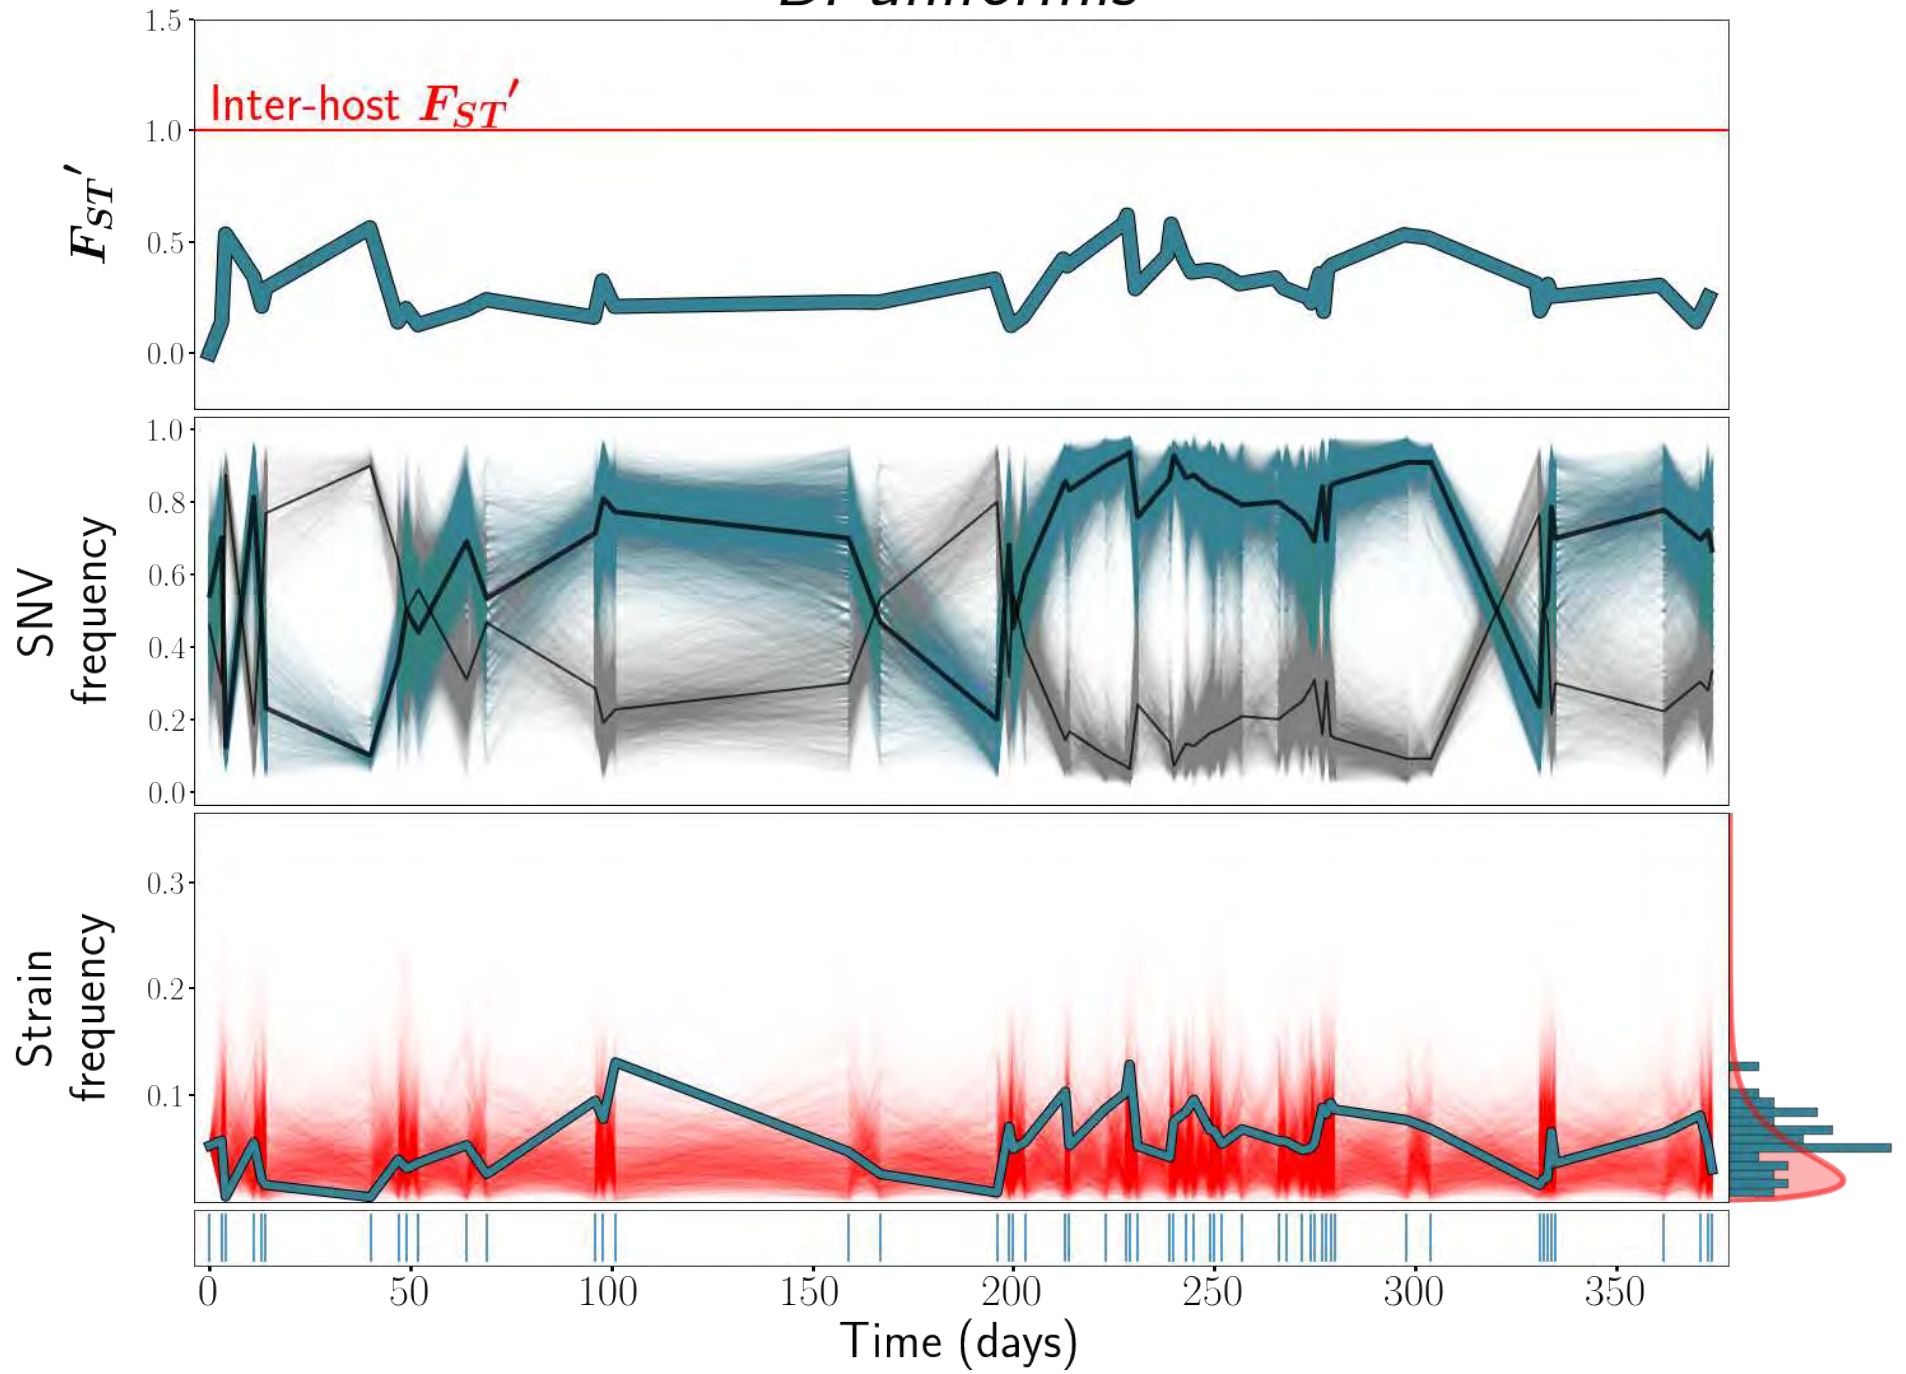

*B. uniformis*

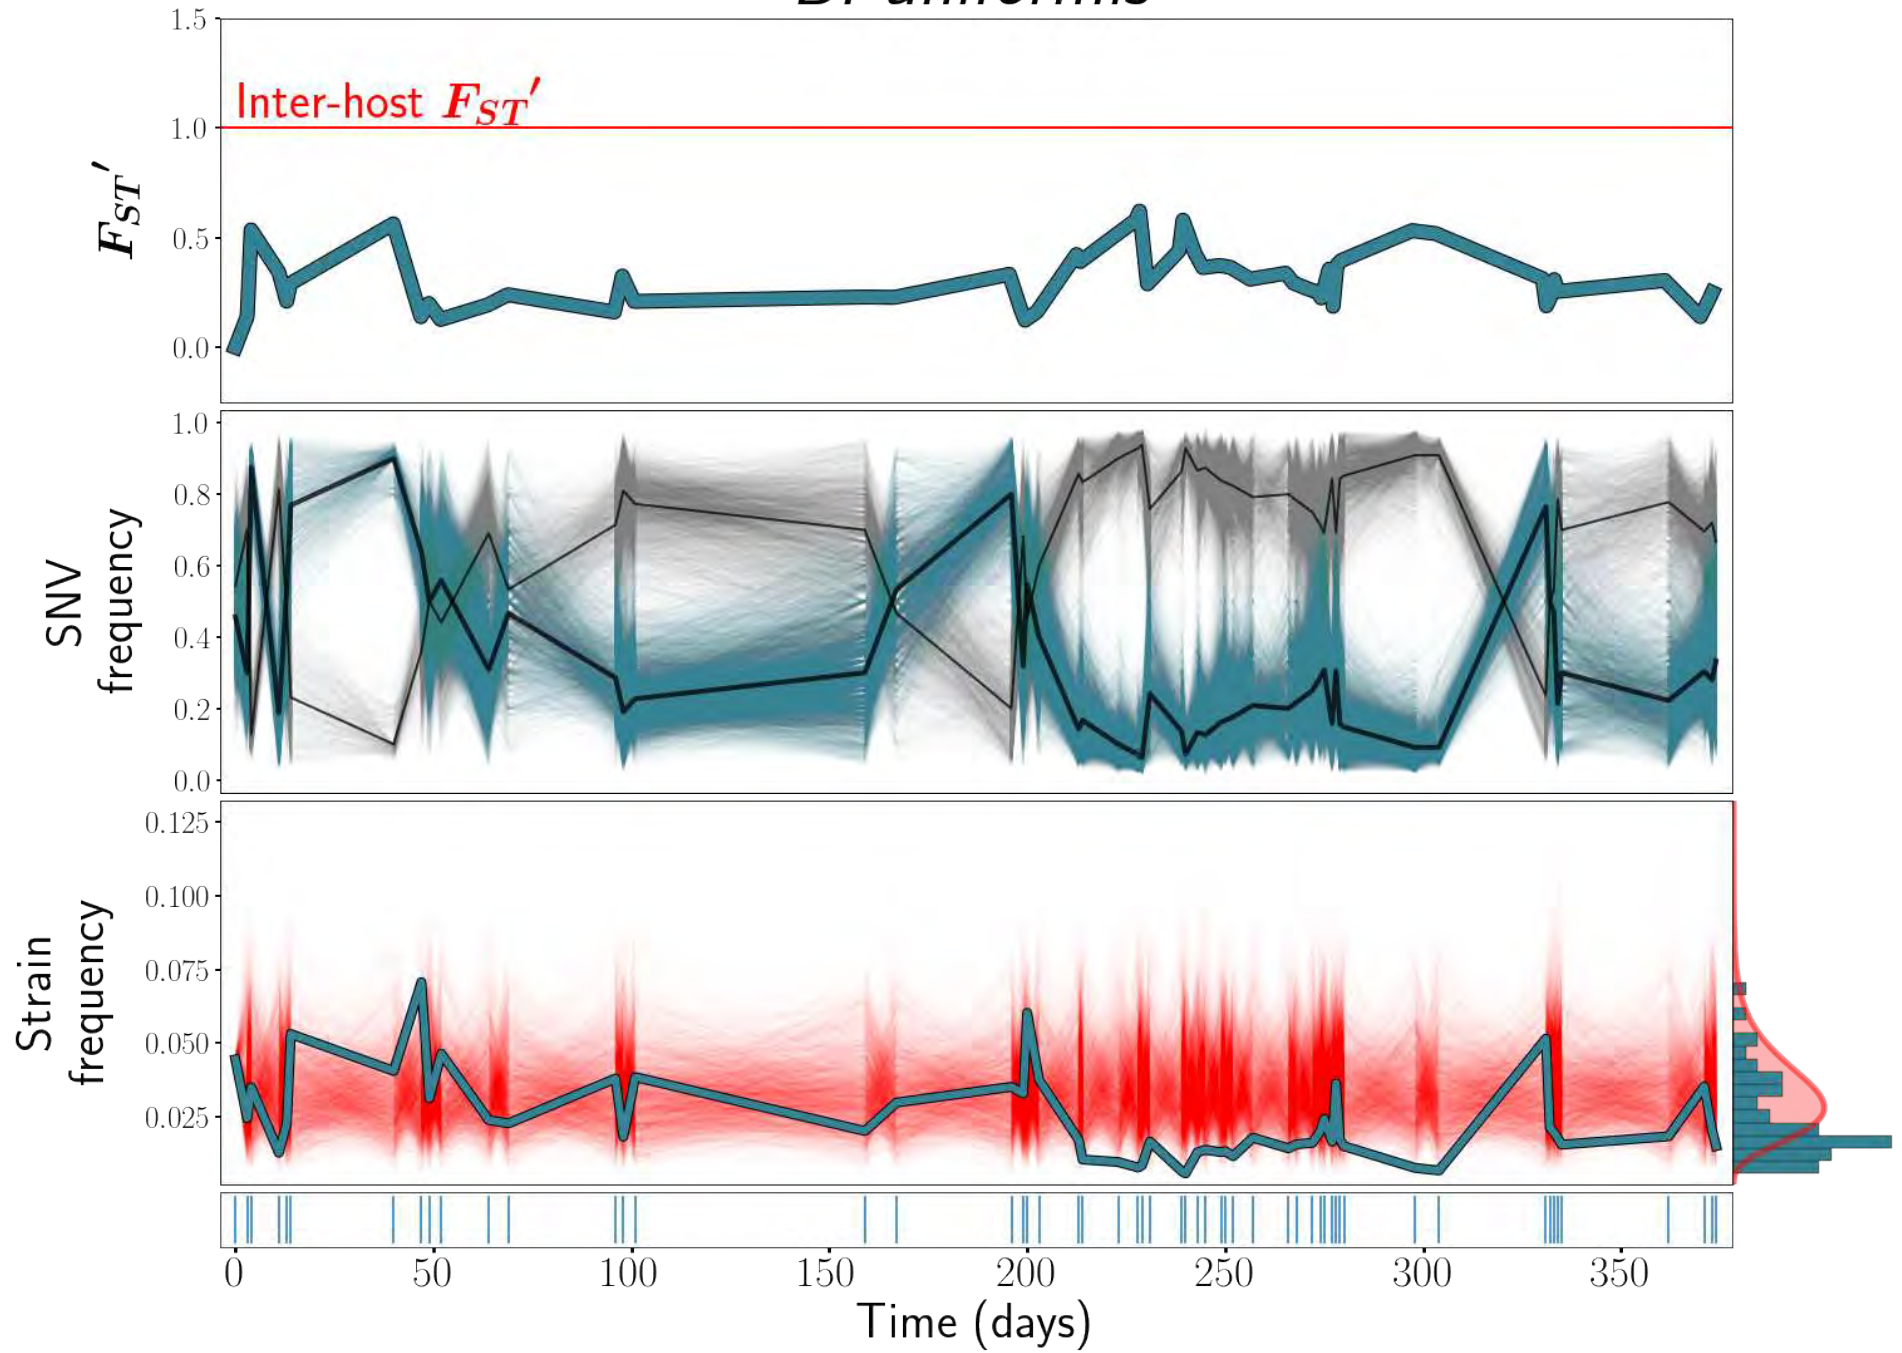

*B. xylanisolvens*

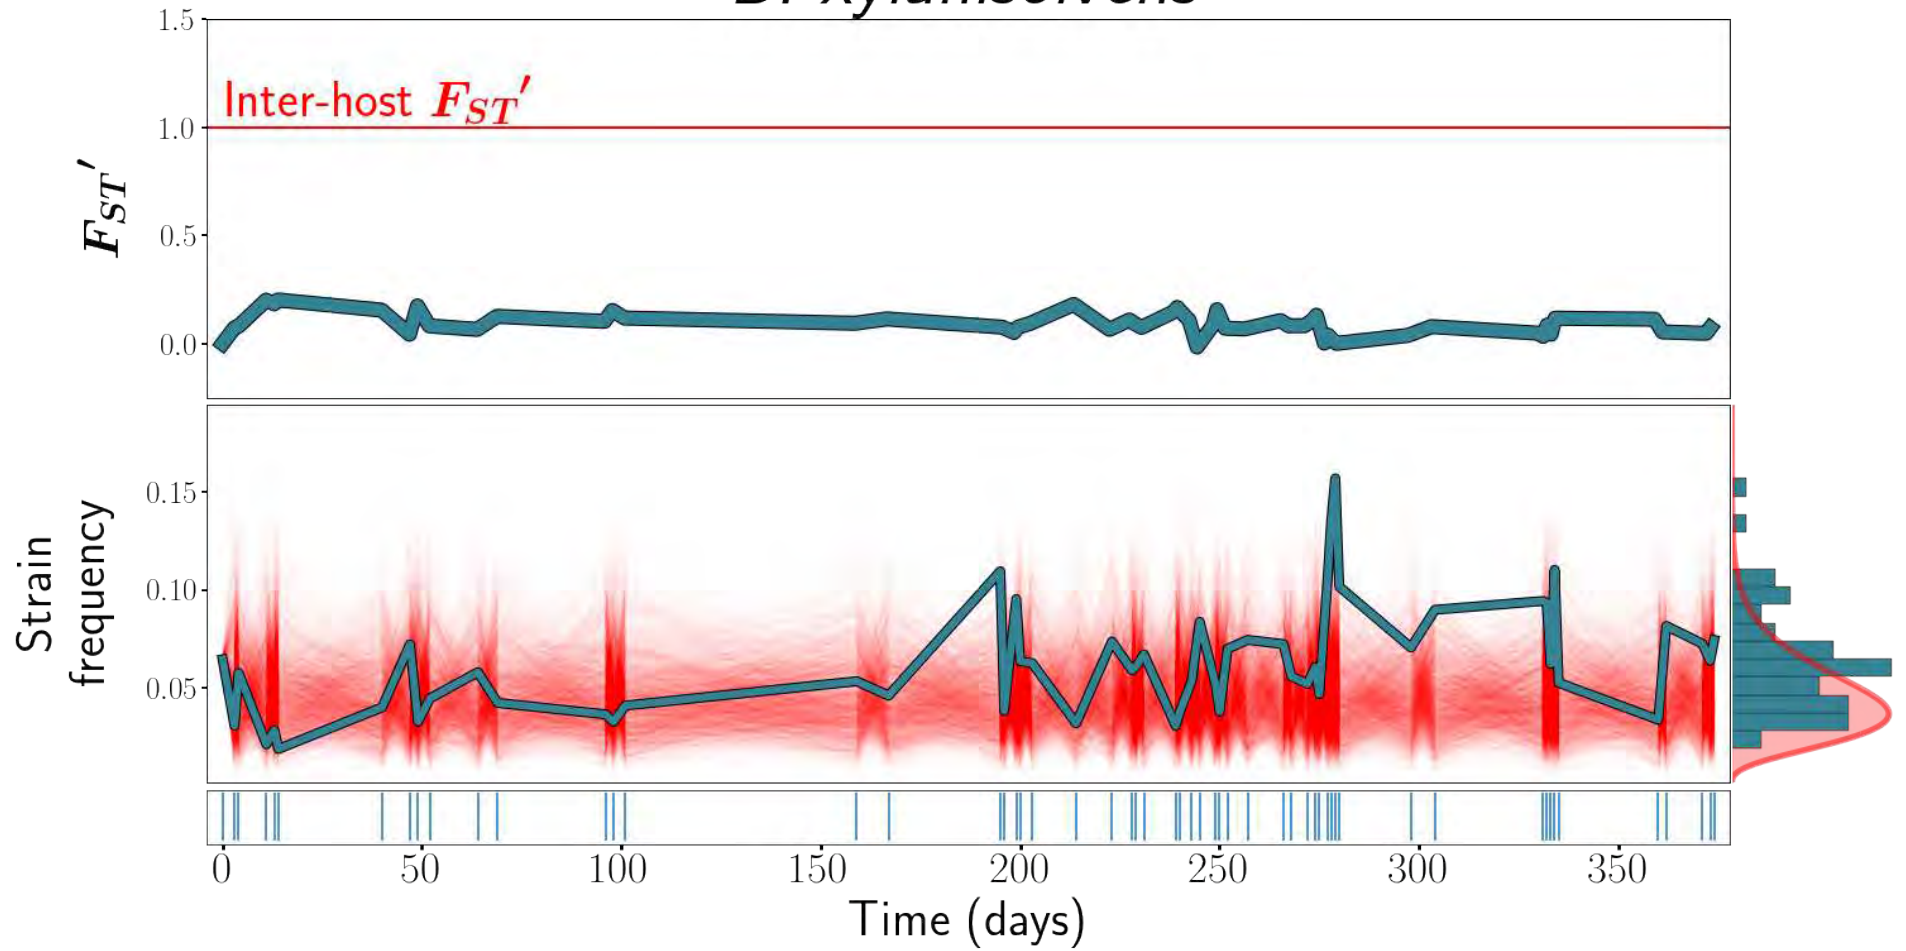

*B. intestinihominis*

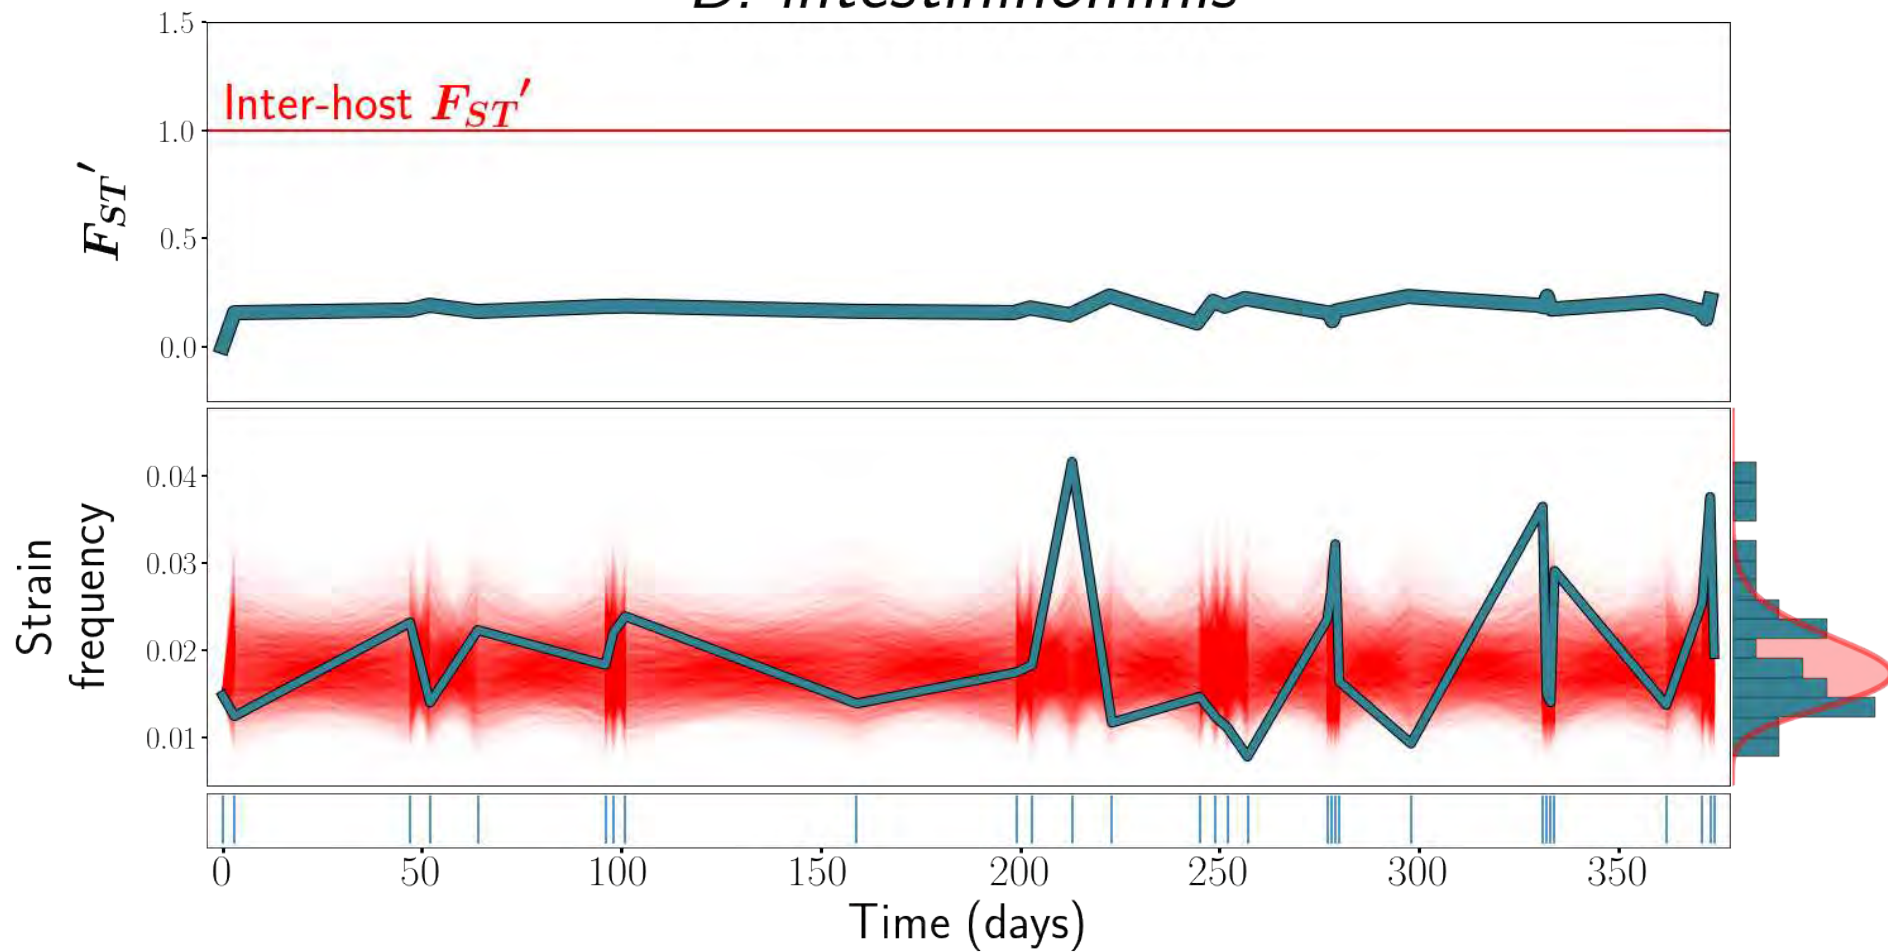

# *E. rectale*

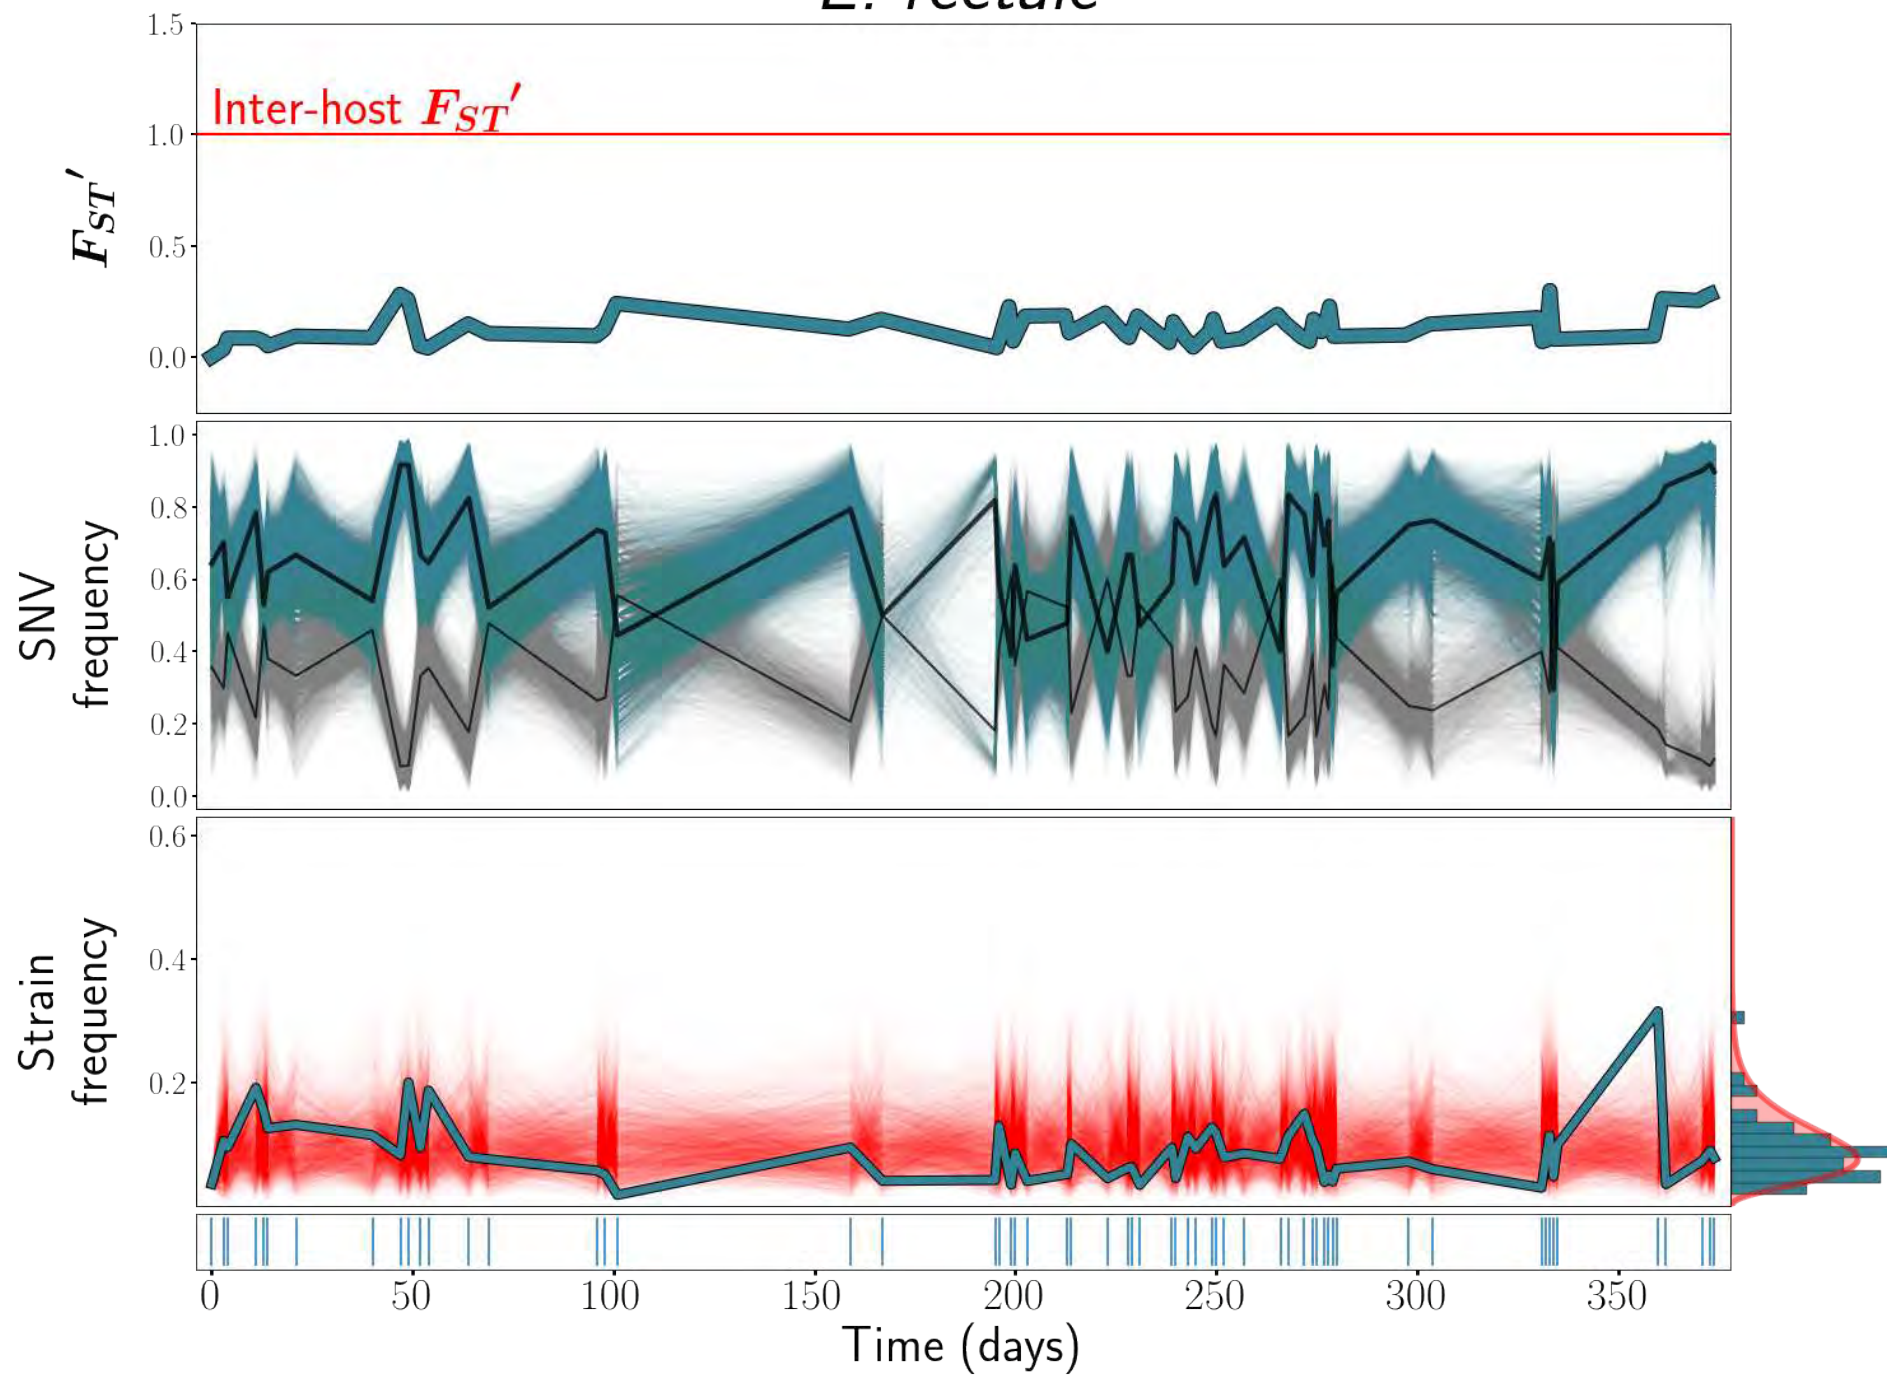



# *E. rectale*

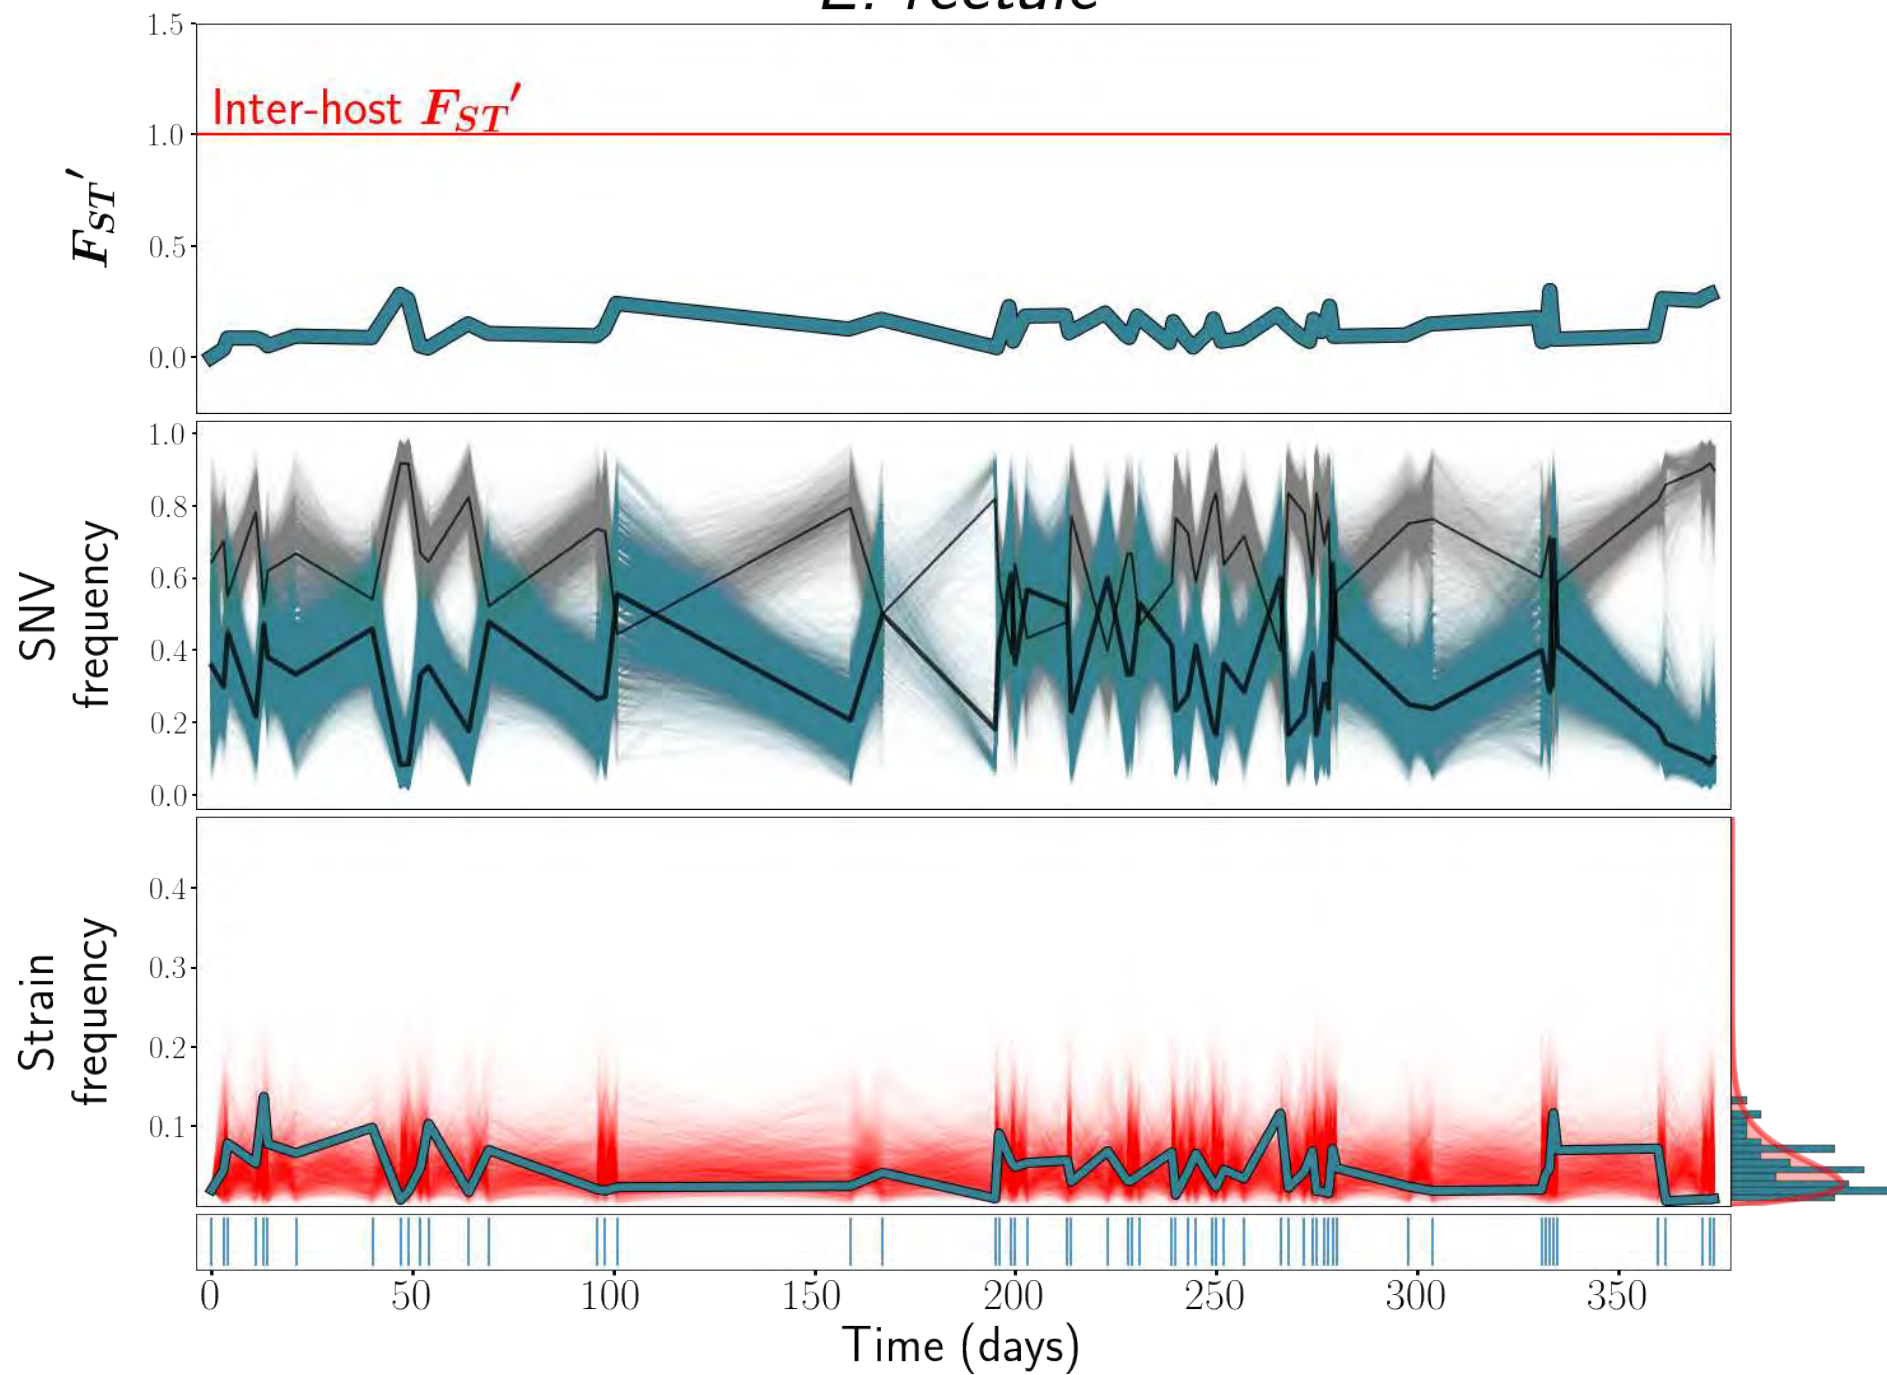

*P. clara*

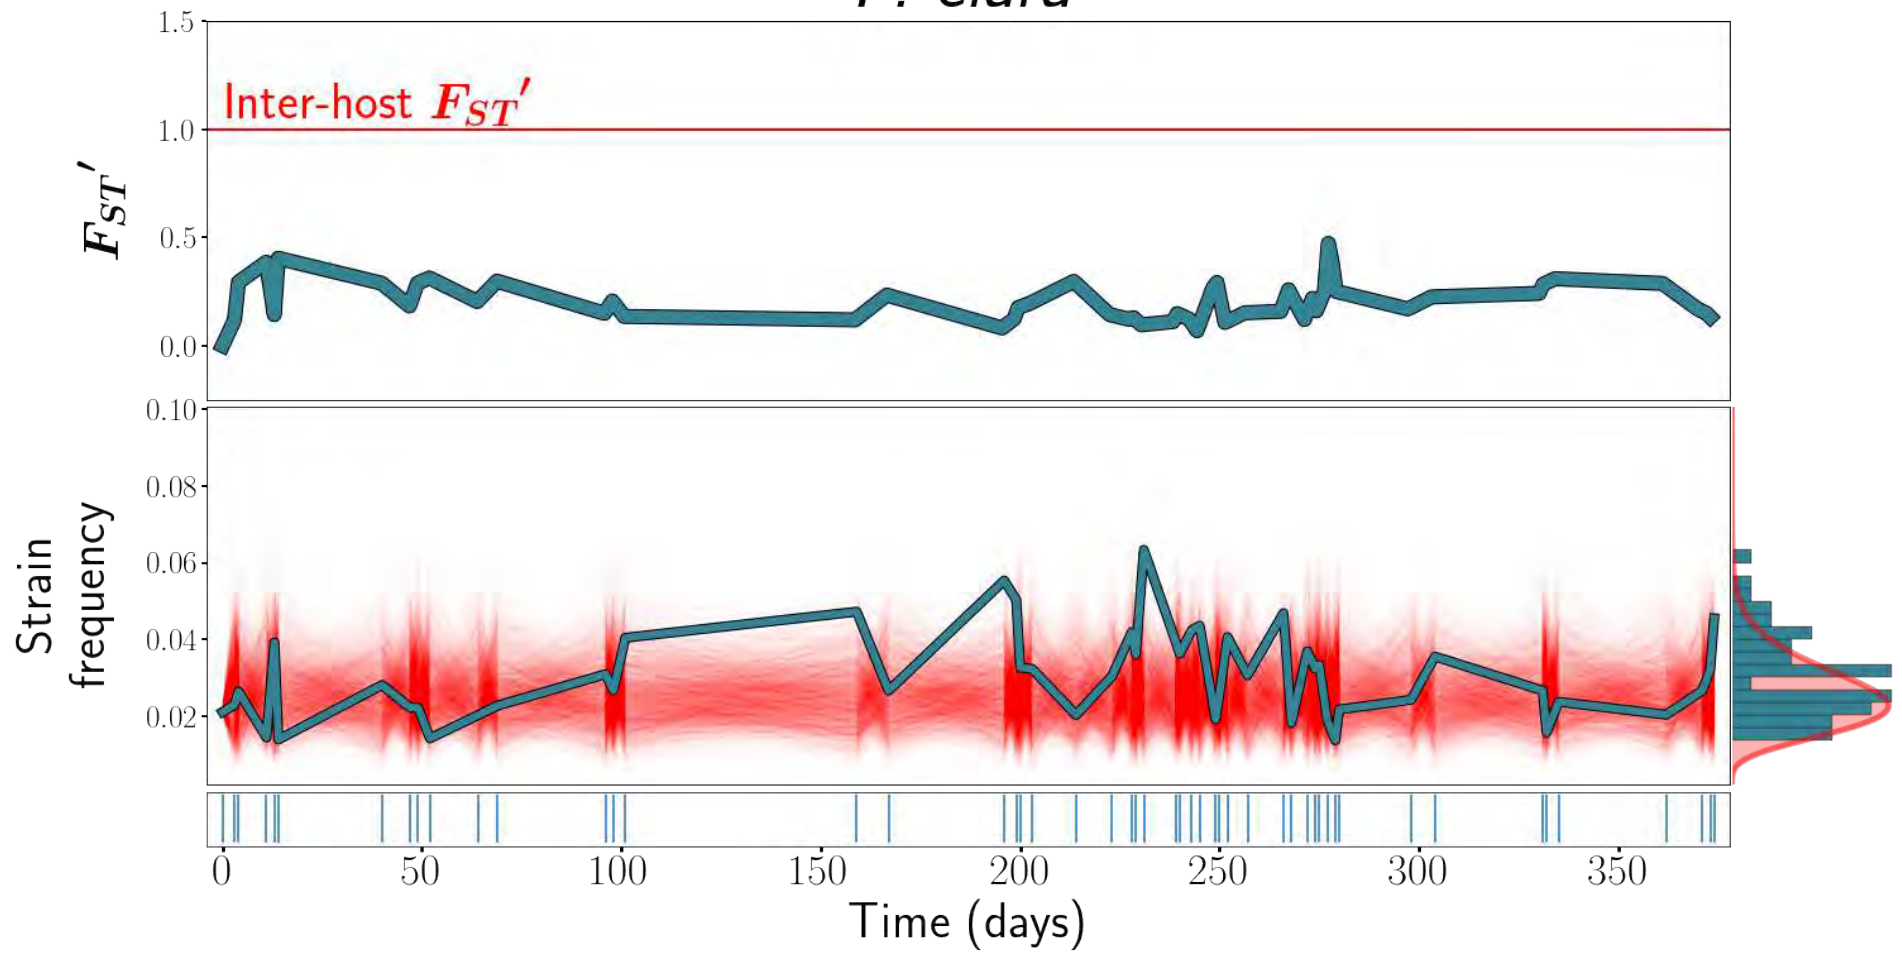

# *P. massiliensis*

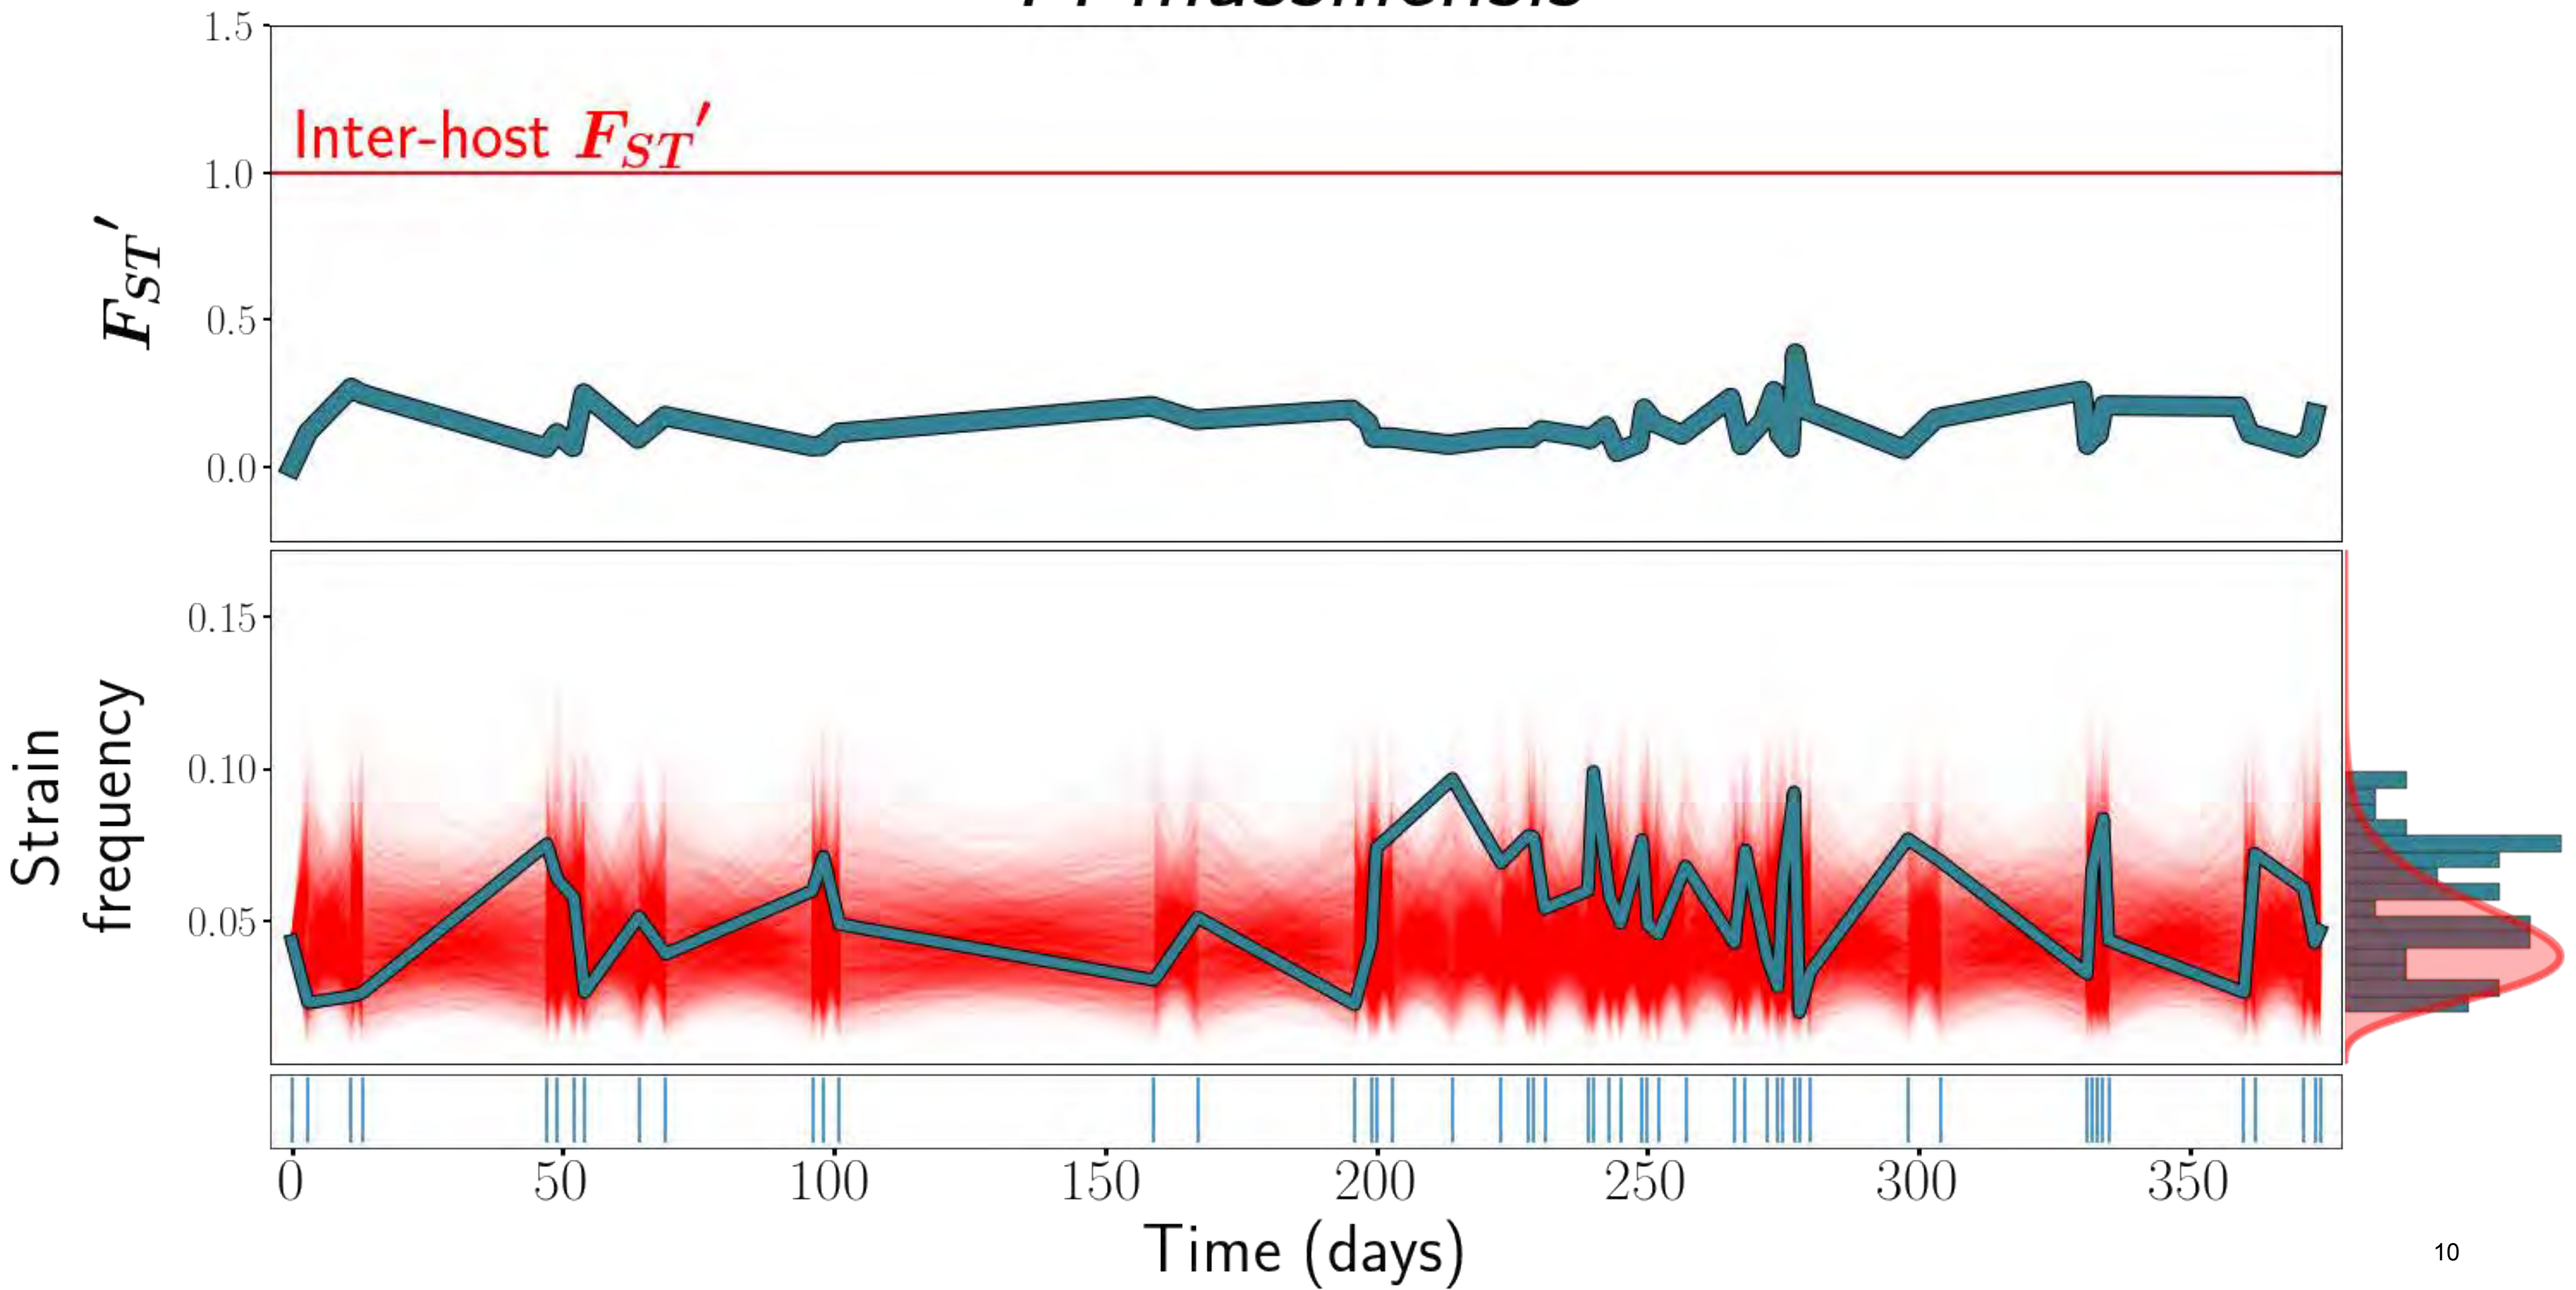

# *P. vulgatus*

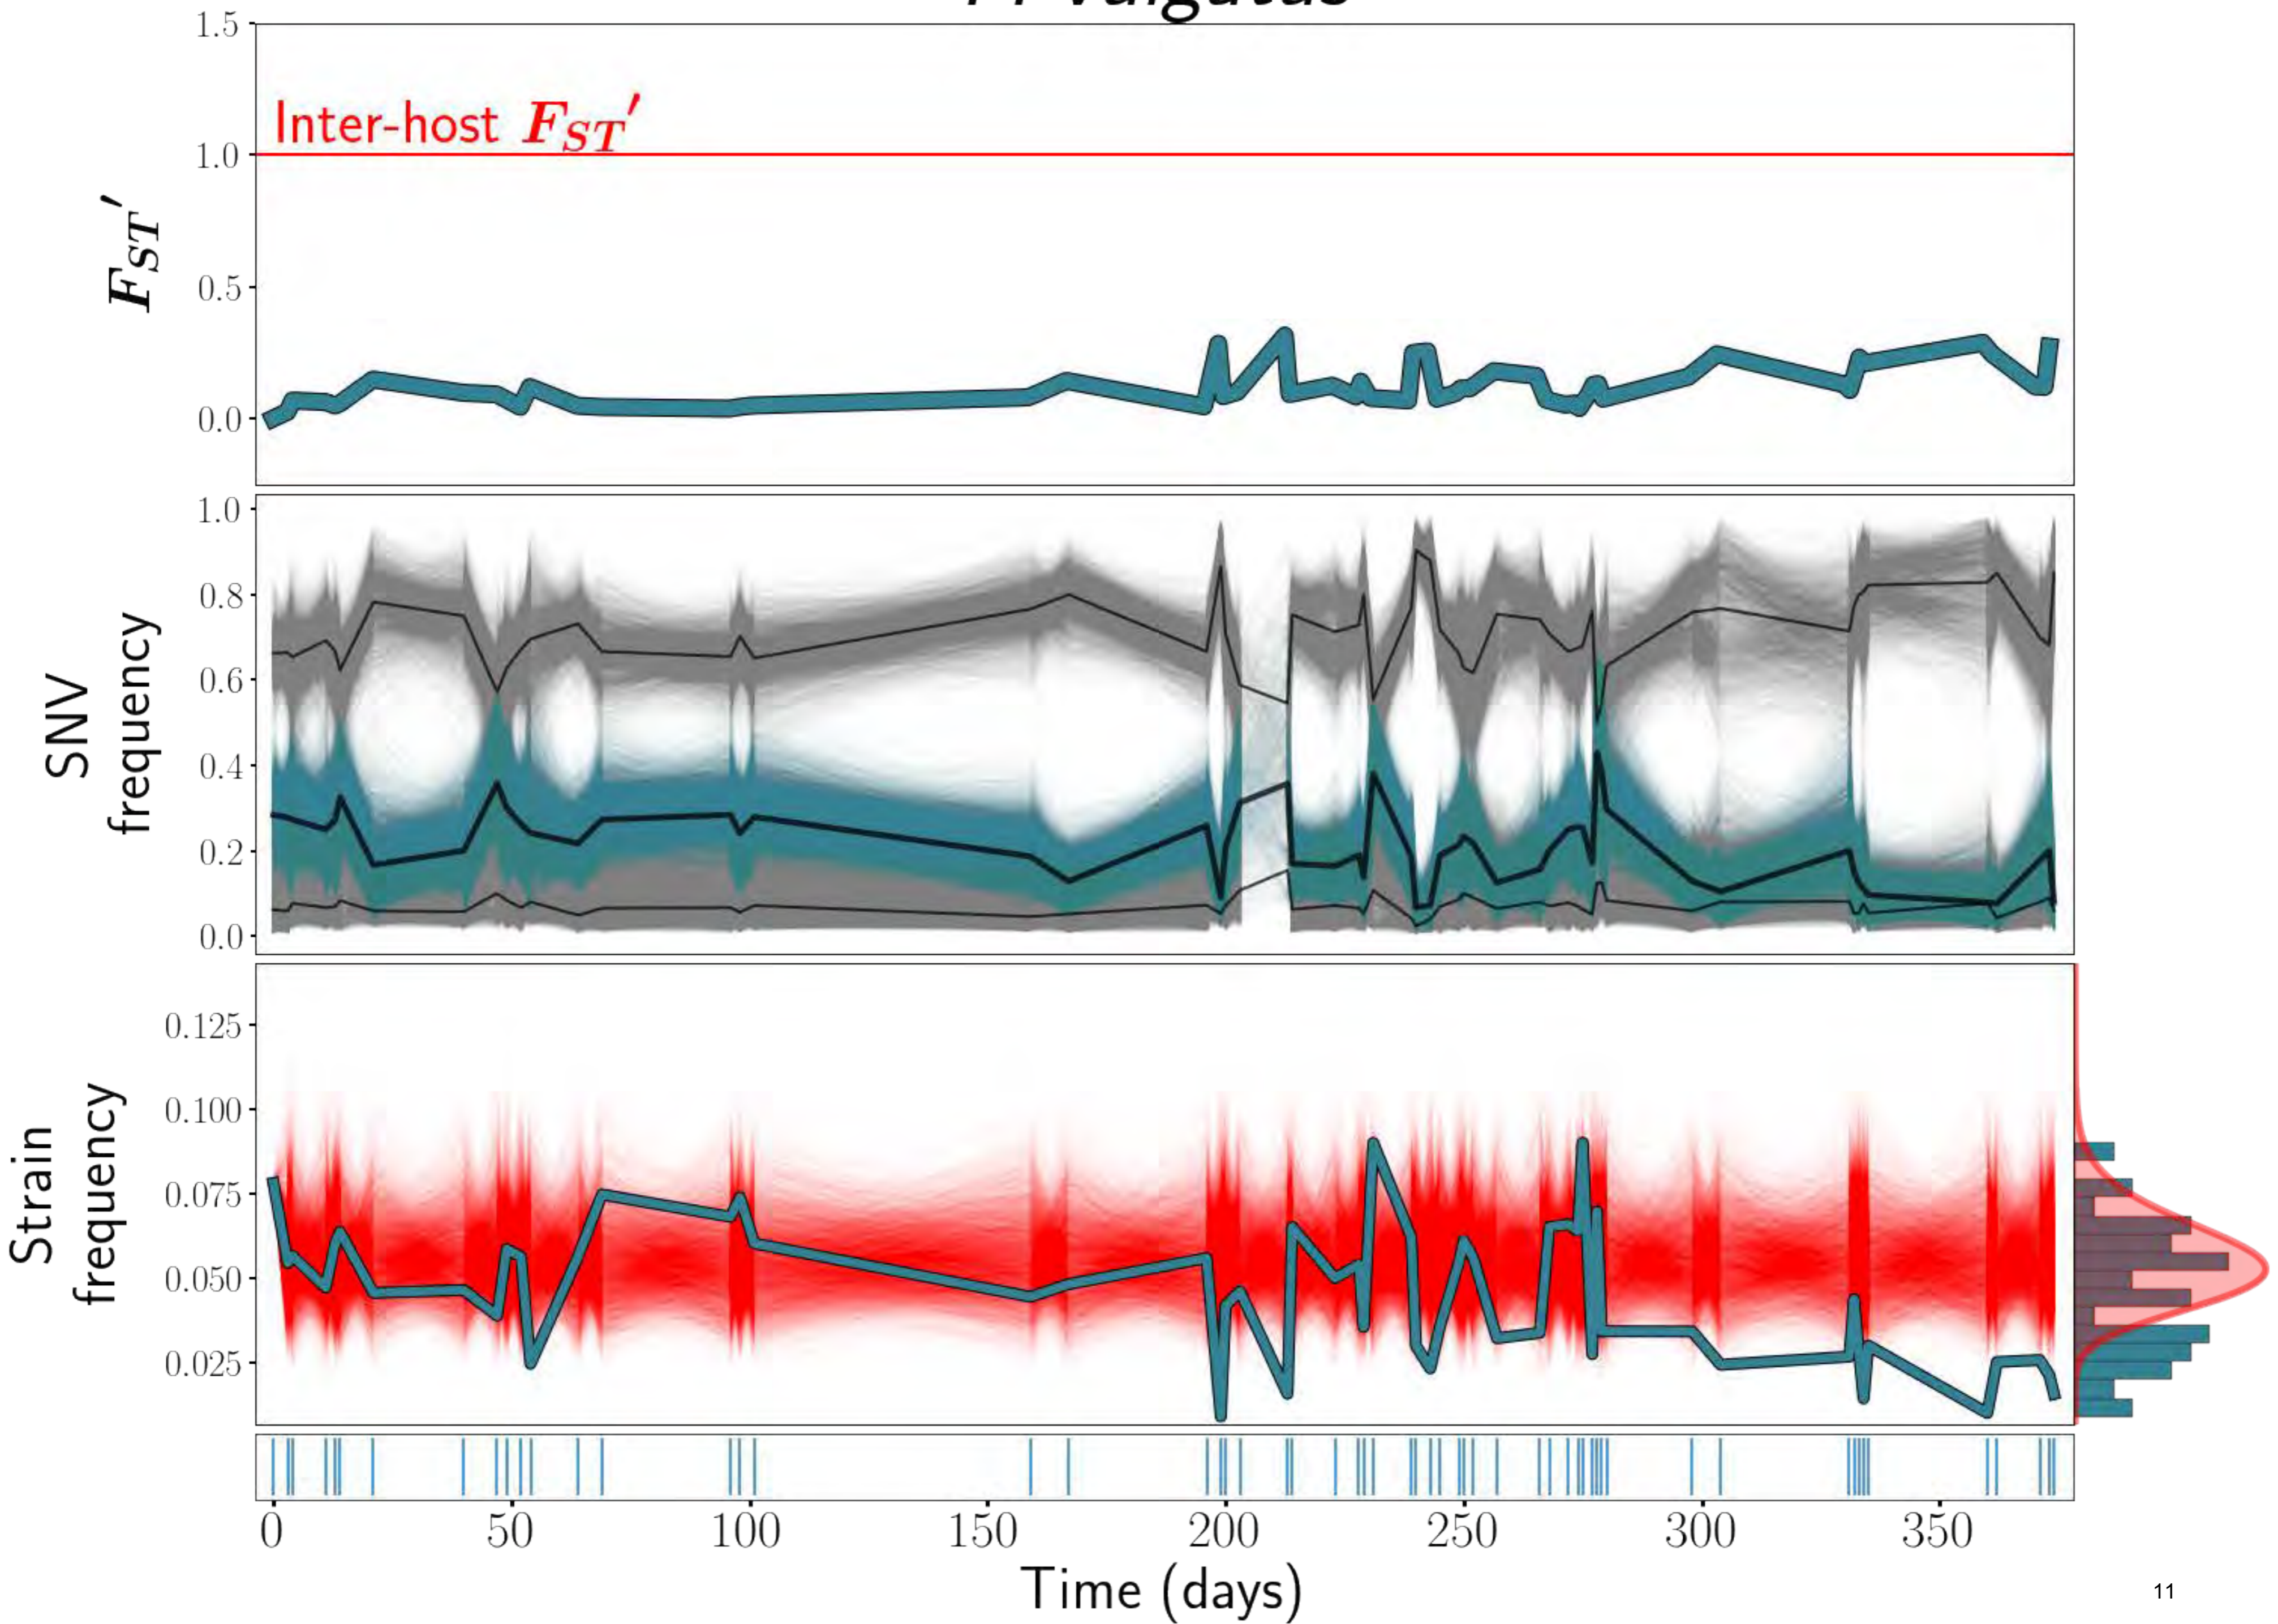

# *P. vulgatus*

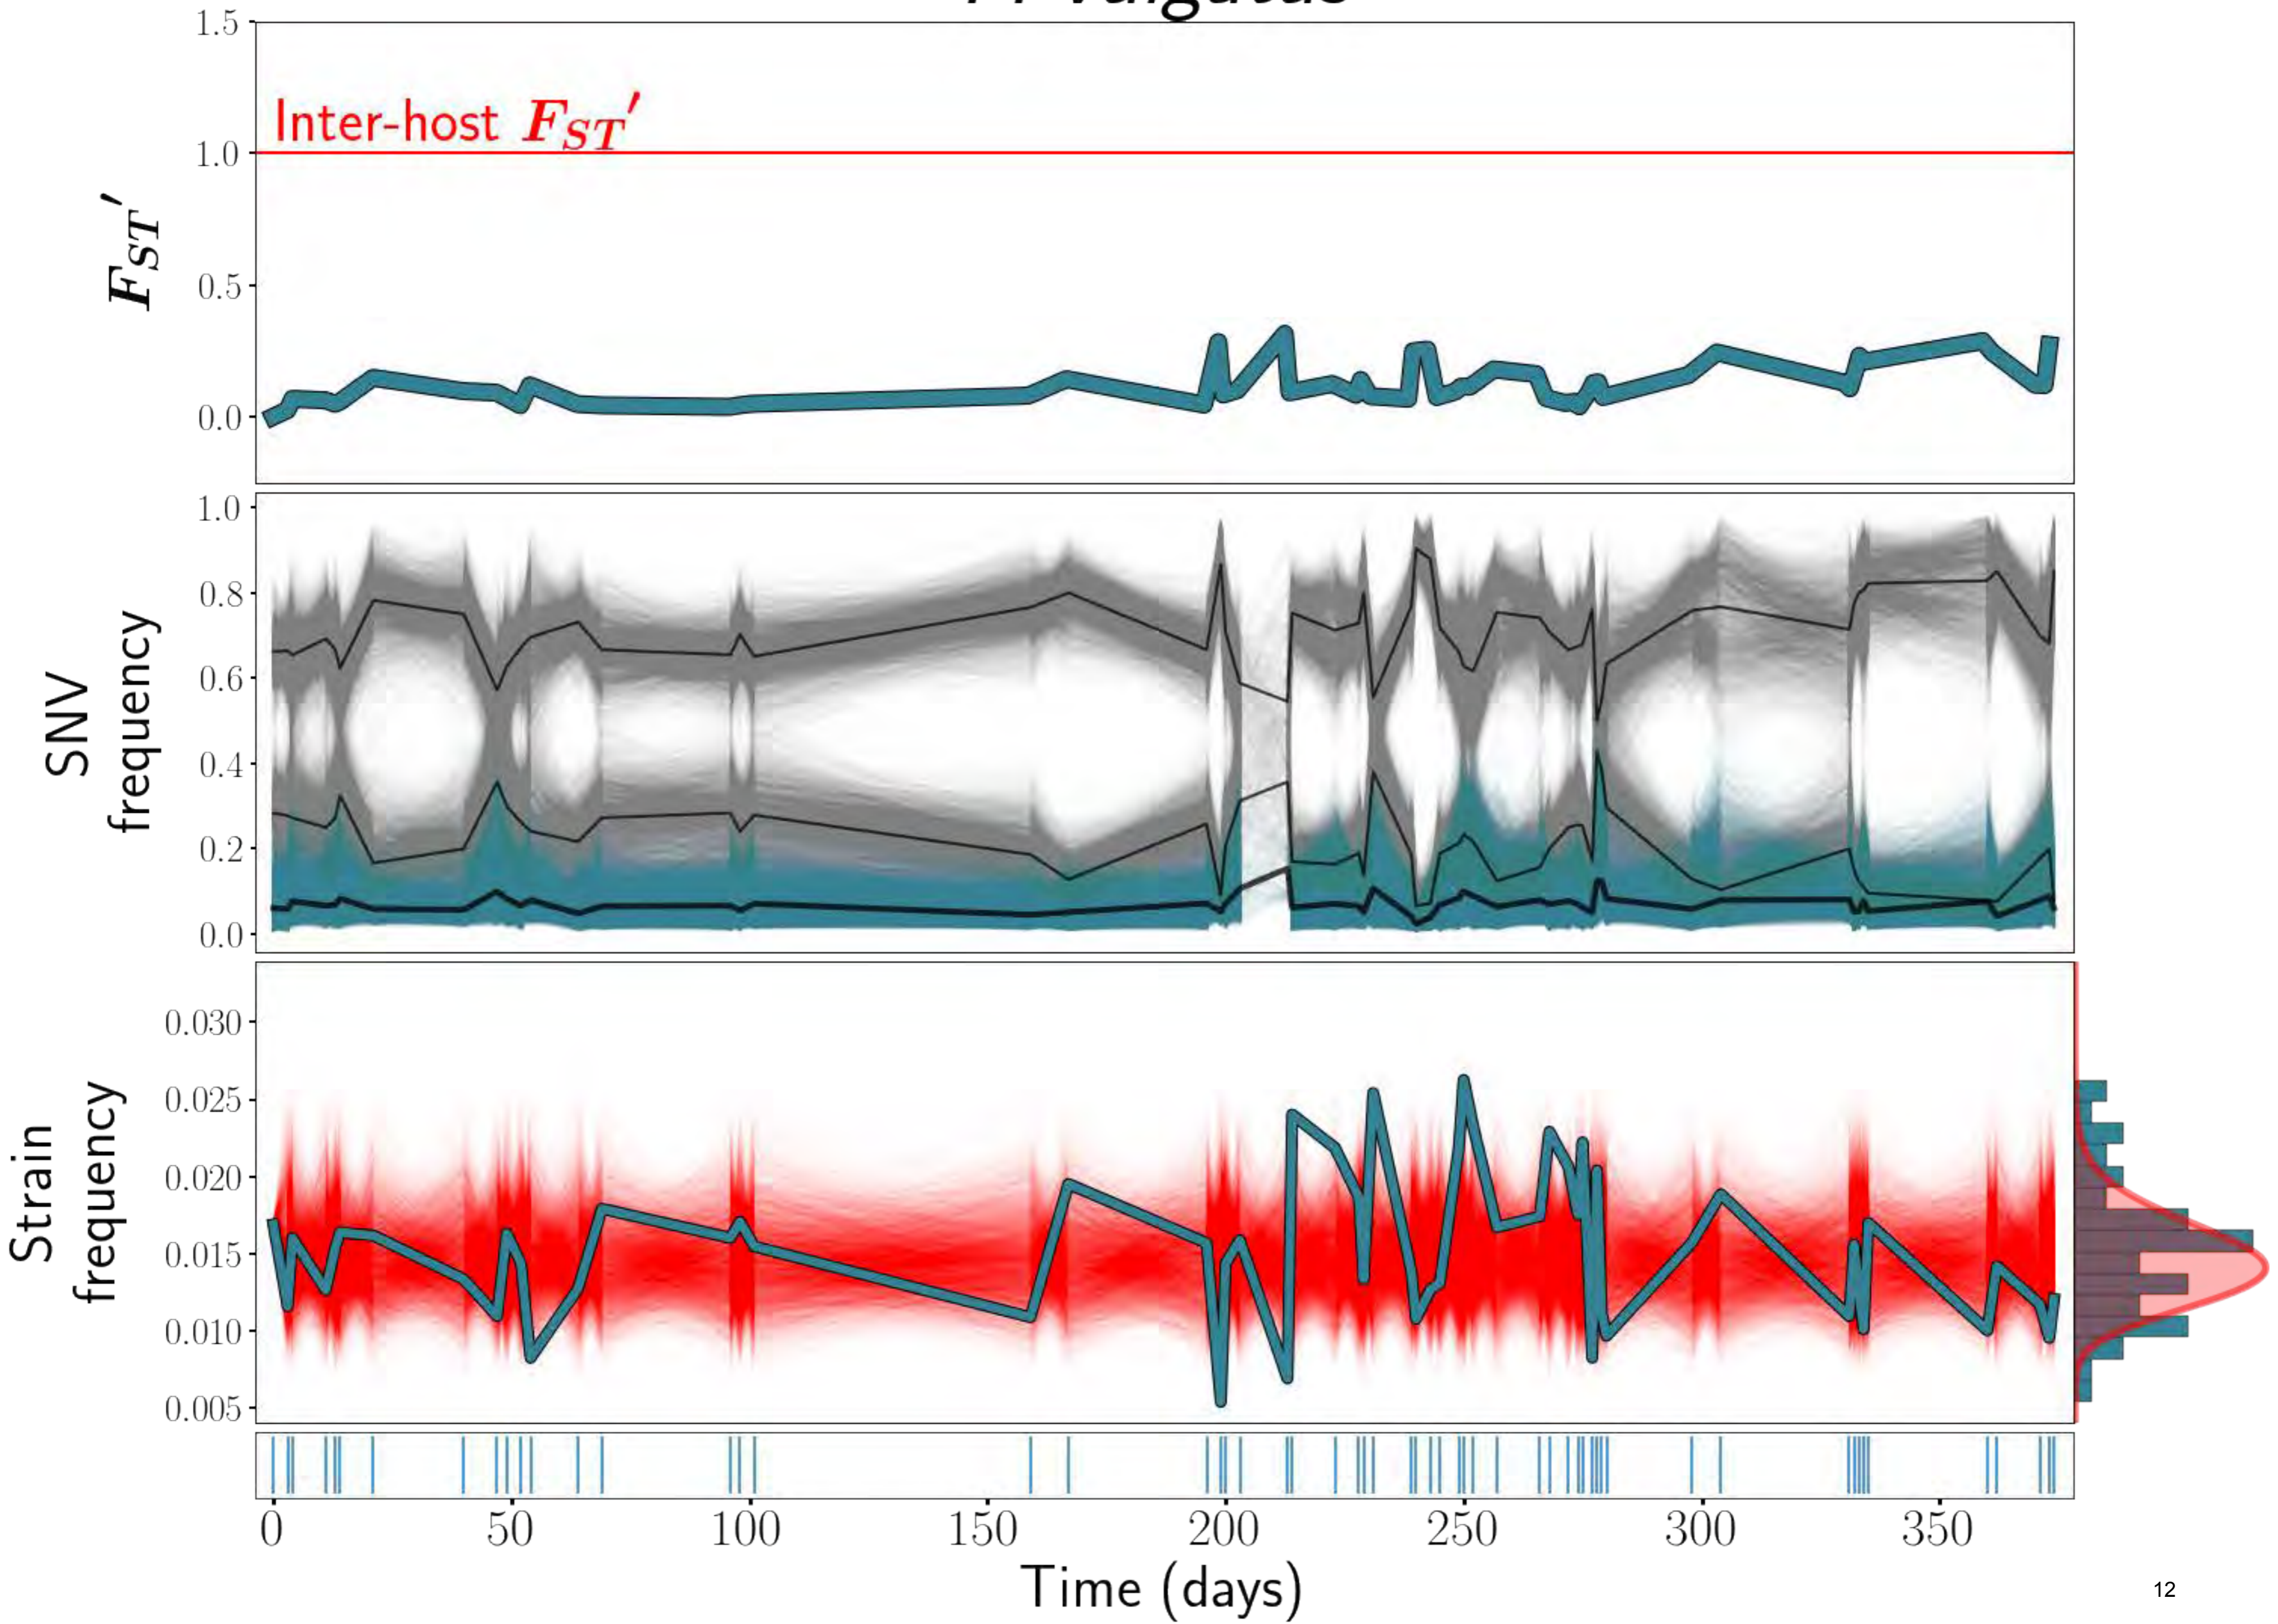

# *P. vulgatus*

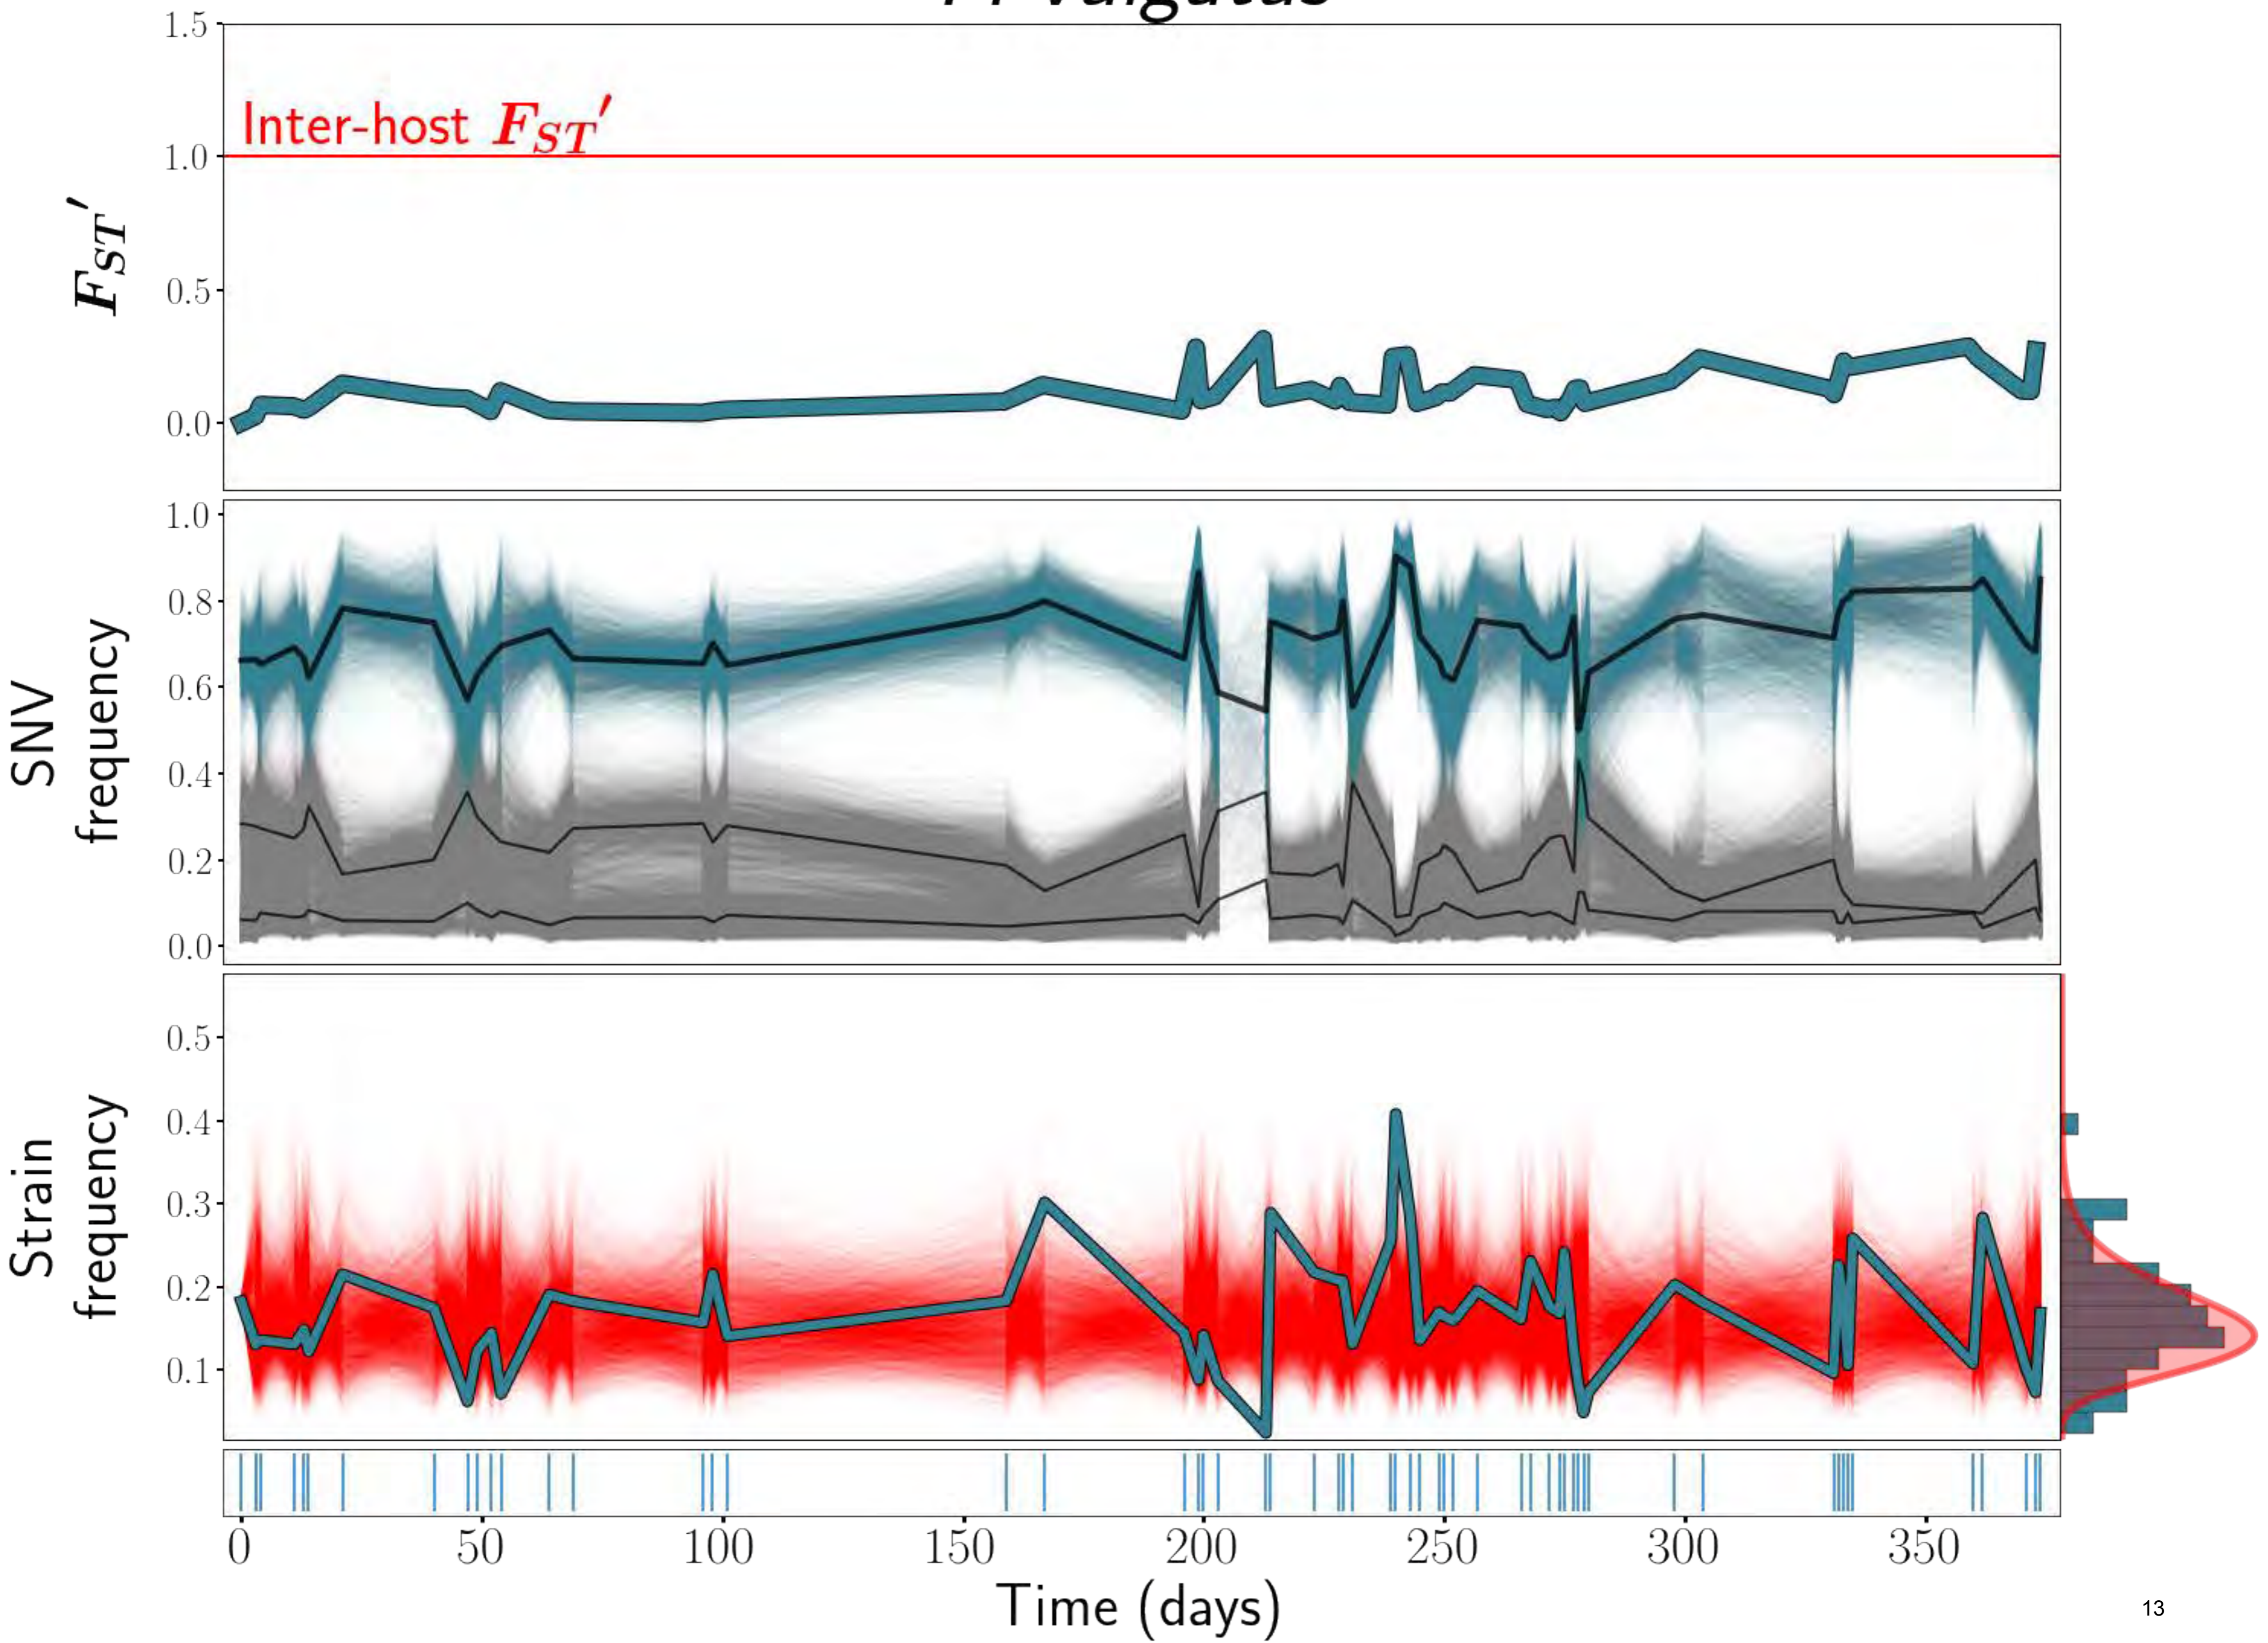

# *R. bromii*

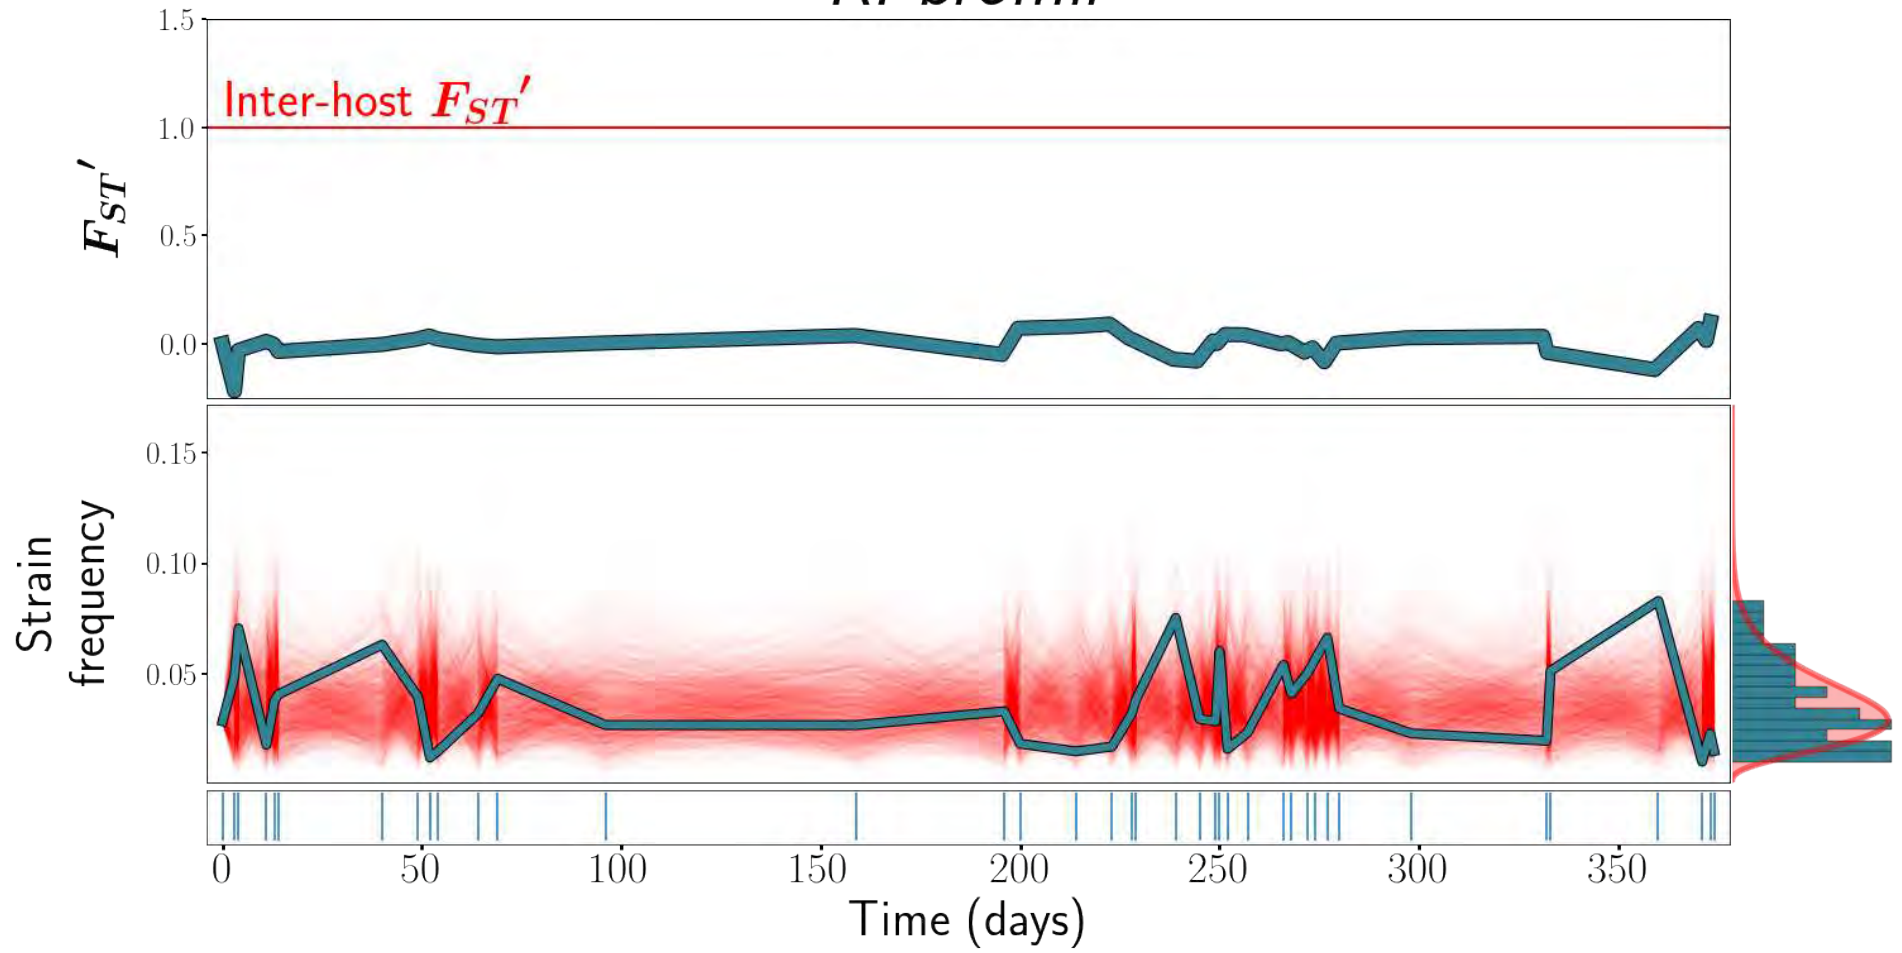

# *S. wadsworthensis*

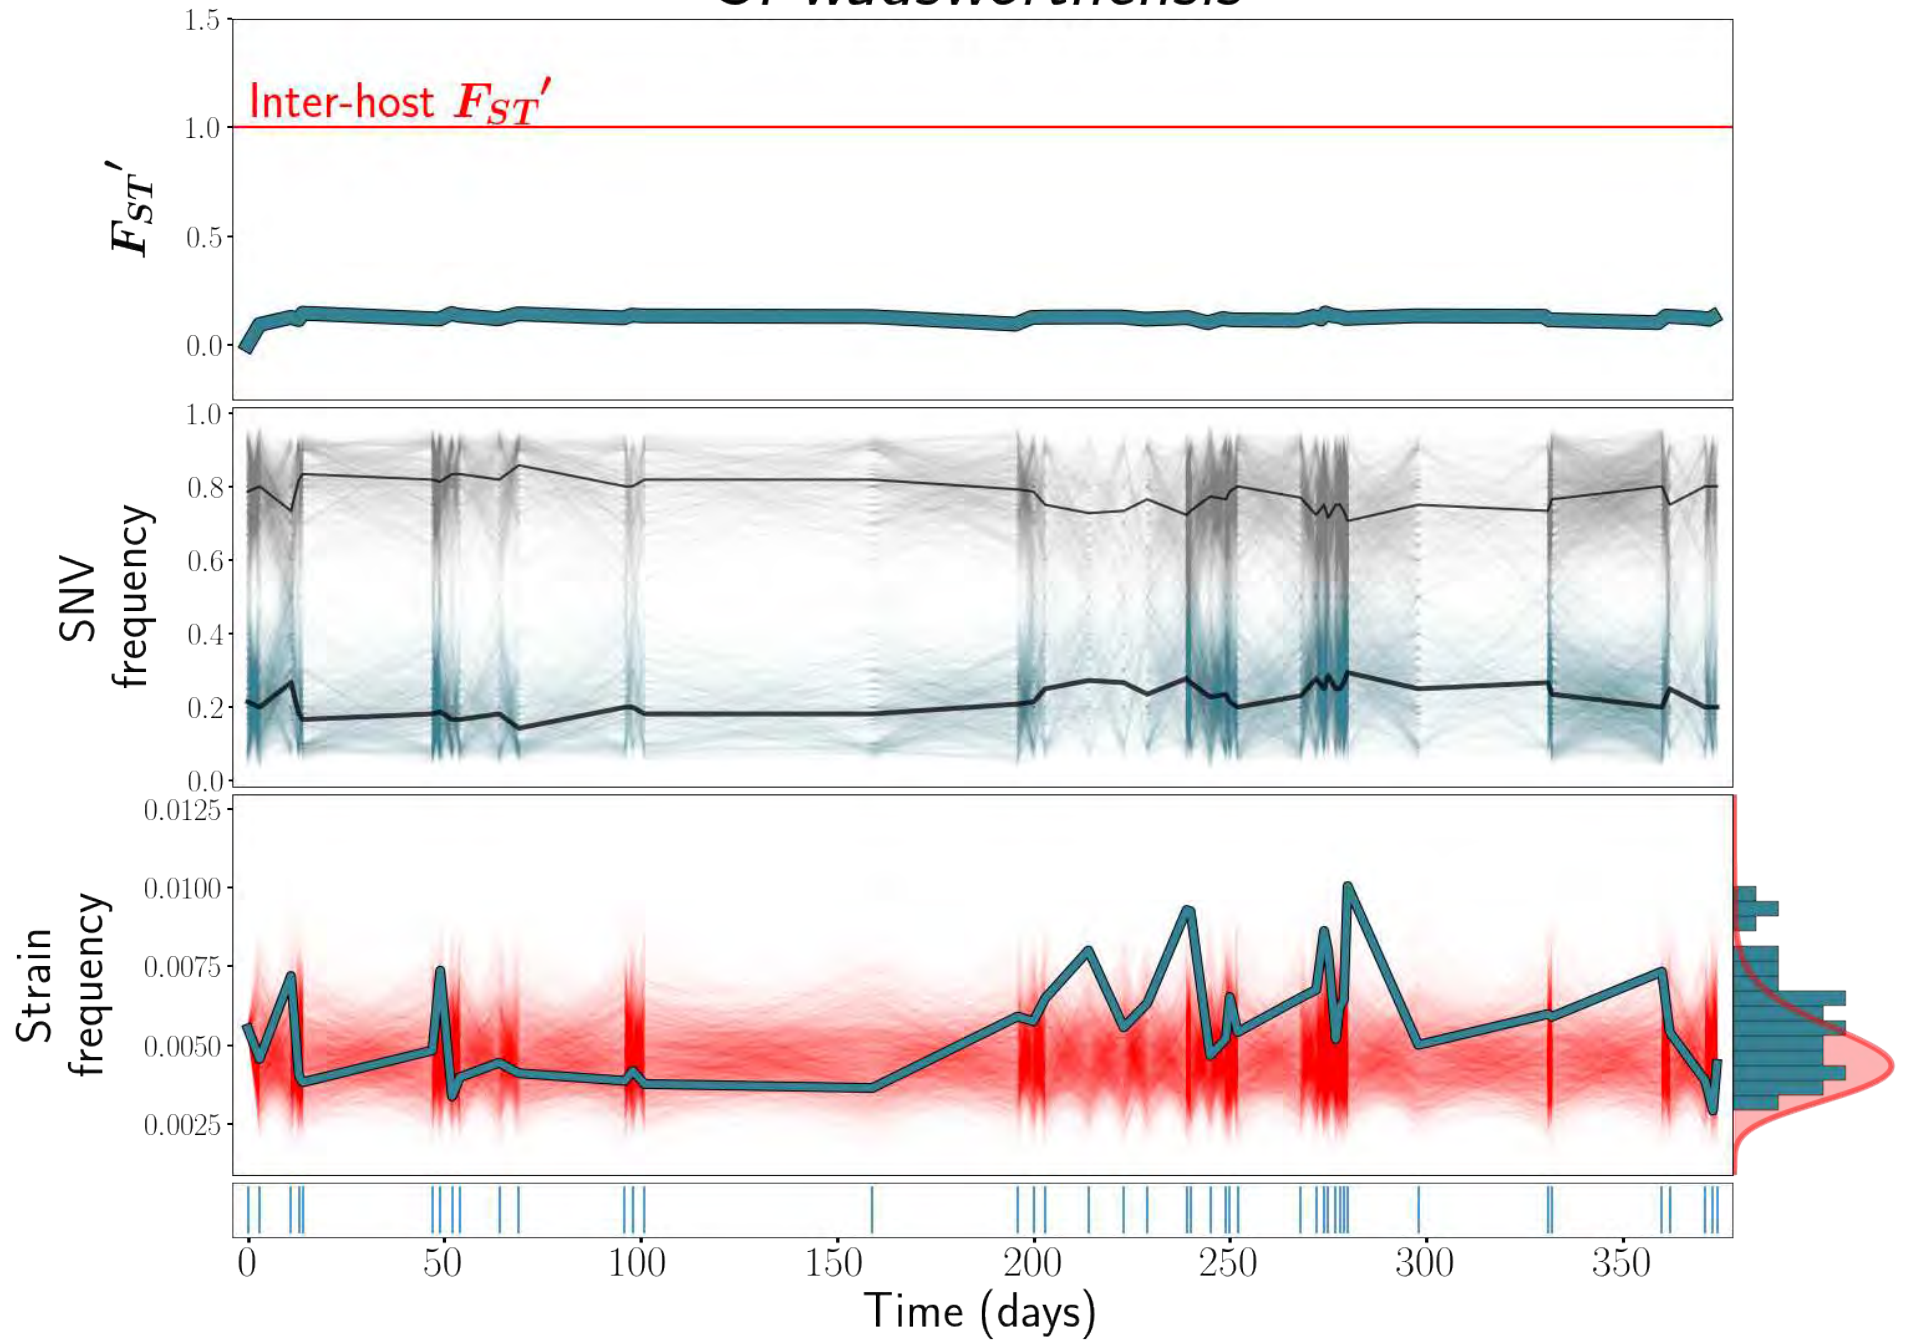



# *S. wadsworthensis*

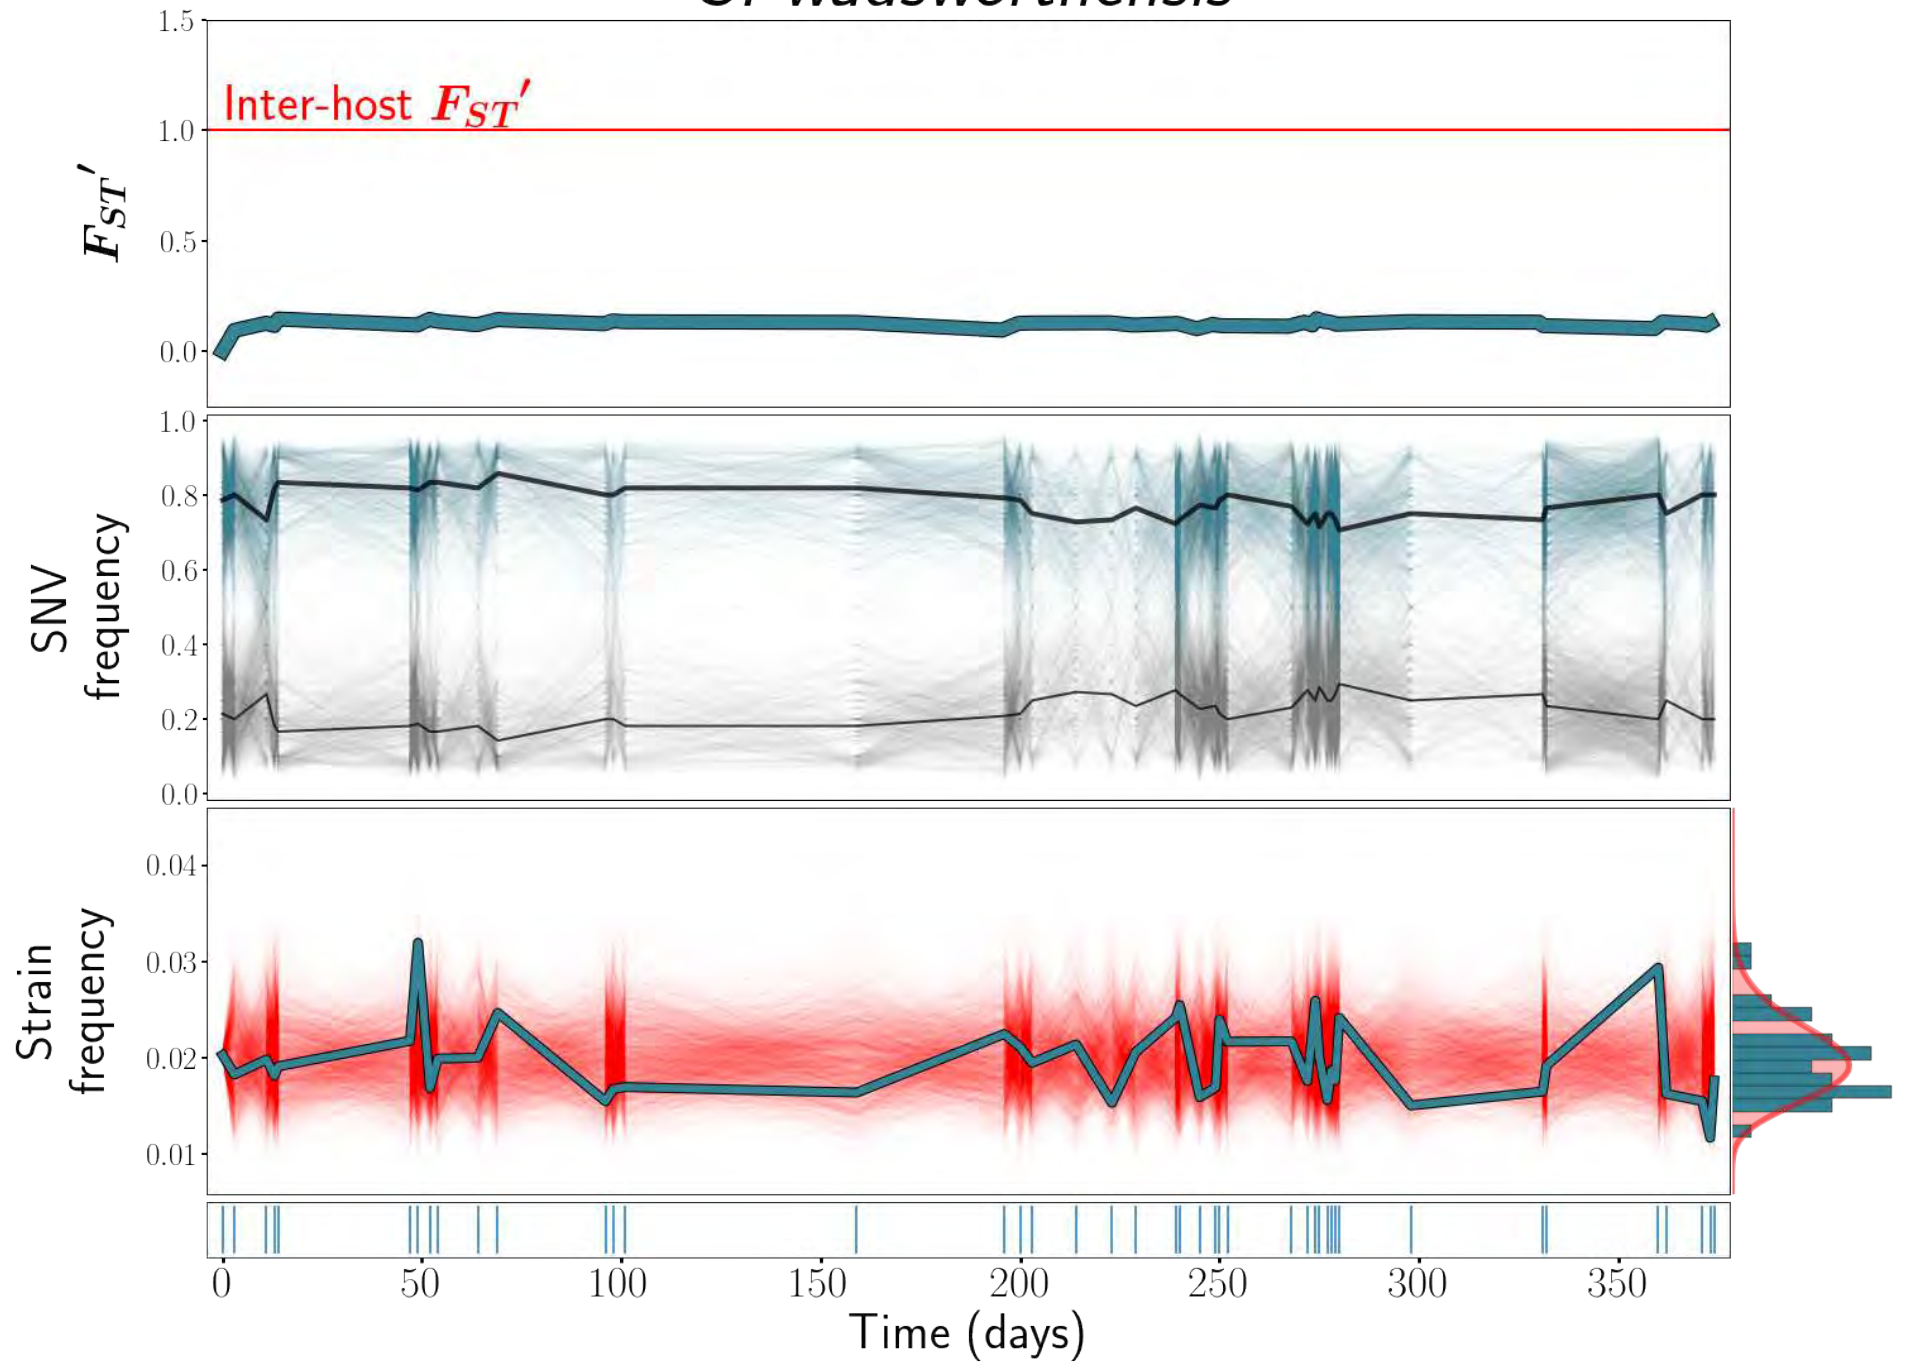

Supplement: mbio.02502-22-s0004.pdf [file mbio.02502-22-s0004.pdf]
