# Supplementary material for: Ecological Stability Emerges at the Level of Strains in the Human Gut Microbiome
Source: PubMed Central journal article supplement (PMC10127601; doi:10.1128/mbio.02502-22), 2023-02-21

# S5 Text

$F_{ST}$ , strain frequency, and strain abundance dynamics plots for all species analyzed, for host *ae*. These plots are analogous to Main Text Figure 1. When only a single strain was detected, only  $F_{ST}$  and strain abundance dynamics plots, but no strain frequency plot, is included.

## *Table of contents*

|                                       |    |
|---------------------------------------|----|
| <i>Alistipes onderdonkii A</i>        | 1  |
| <i>Alistipes onderdonkii B</i>        | 2  |
| <i>Alistipes putredinis A</i>         | 3  |
| <i>Bacteroides cellulosilyticus A</i> | 4  |
| <i>Bacteroides ovatus A</i>           | 5  |
| <i>Bacteroides ovatus B</i>           | 6  |
| <i>Bacteroides thetaiotaomicron A</i> | 7  |
| <i>Bacteroides uniformis A</i>        | 8  |
| <i>Eubacterium rectale A</i>          | 9  |
| <i>Eubacterium rectale B</i>          | 10 |
| <i>Phocaiocola massiliensis A</i>     | 11 |
| <i>Phocaiocola massiliensis B</i>     | 12 |
| <i>Phocaiocola vulgatus A</i>         | 13 |

# *A. onderdonkii*

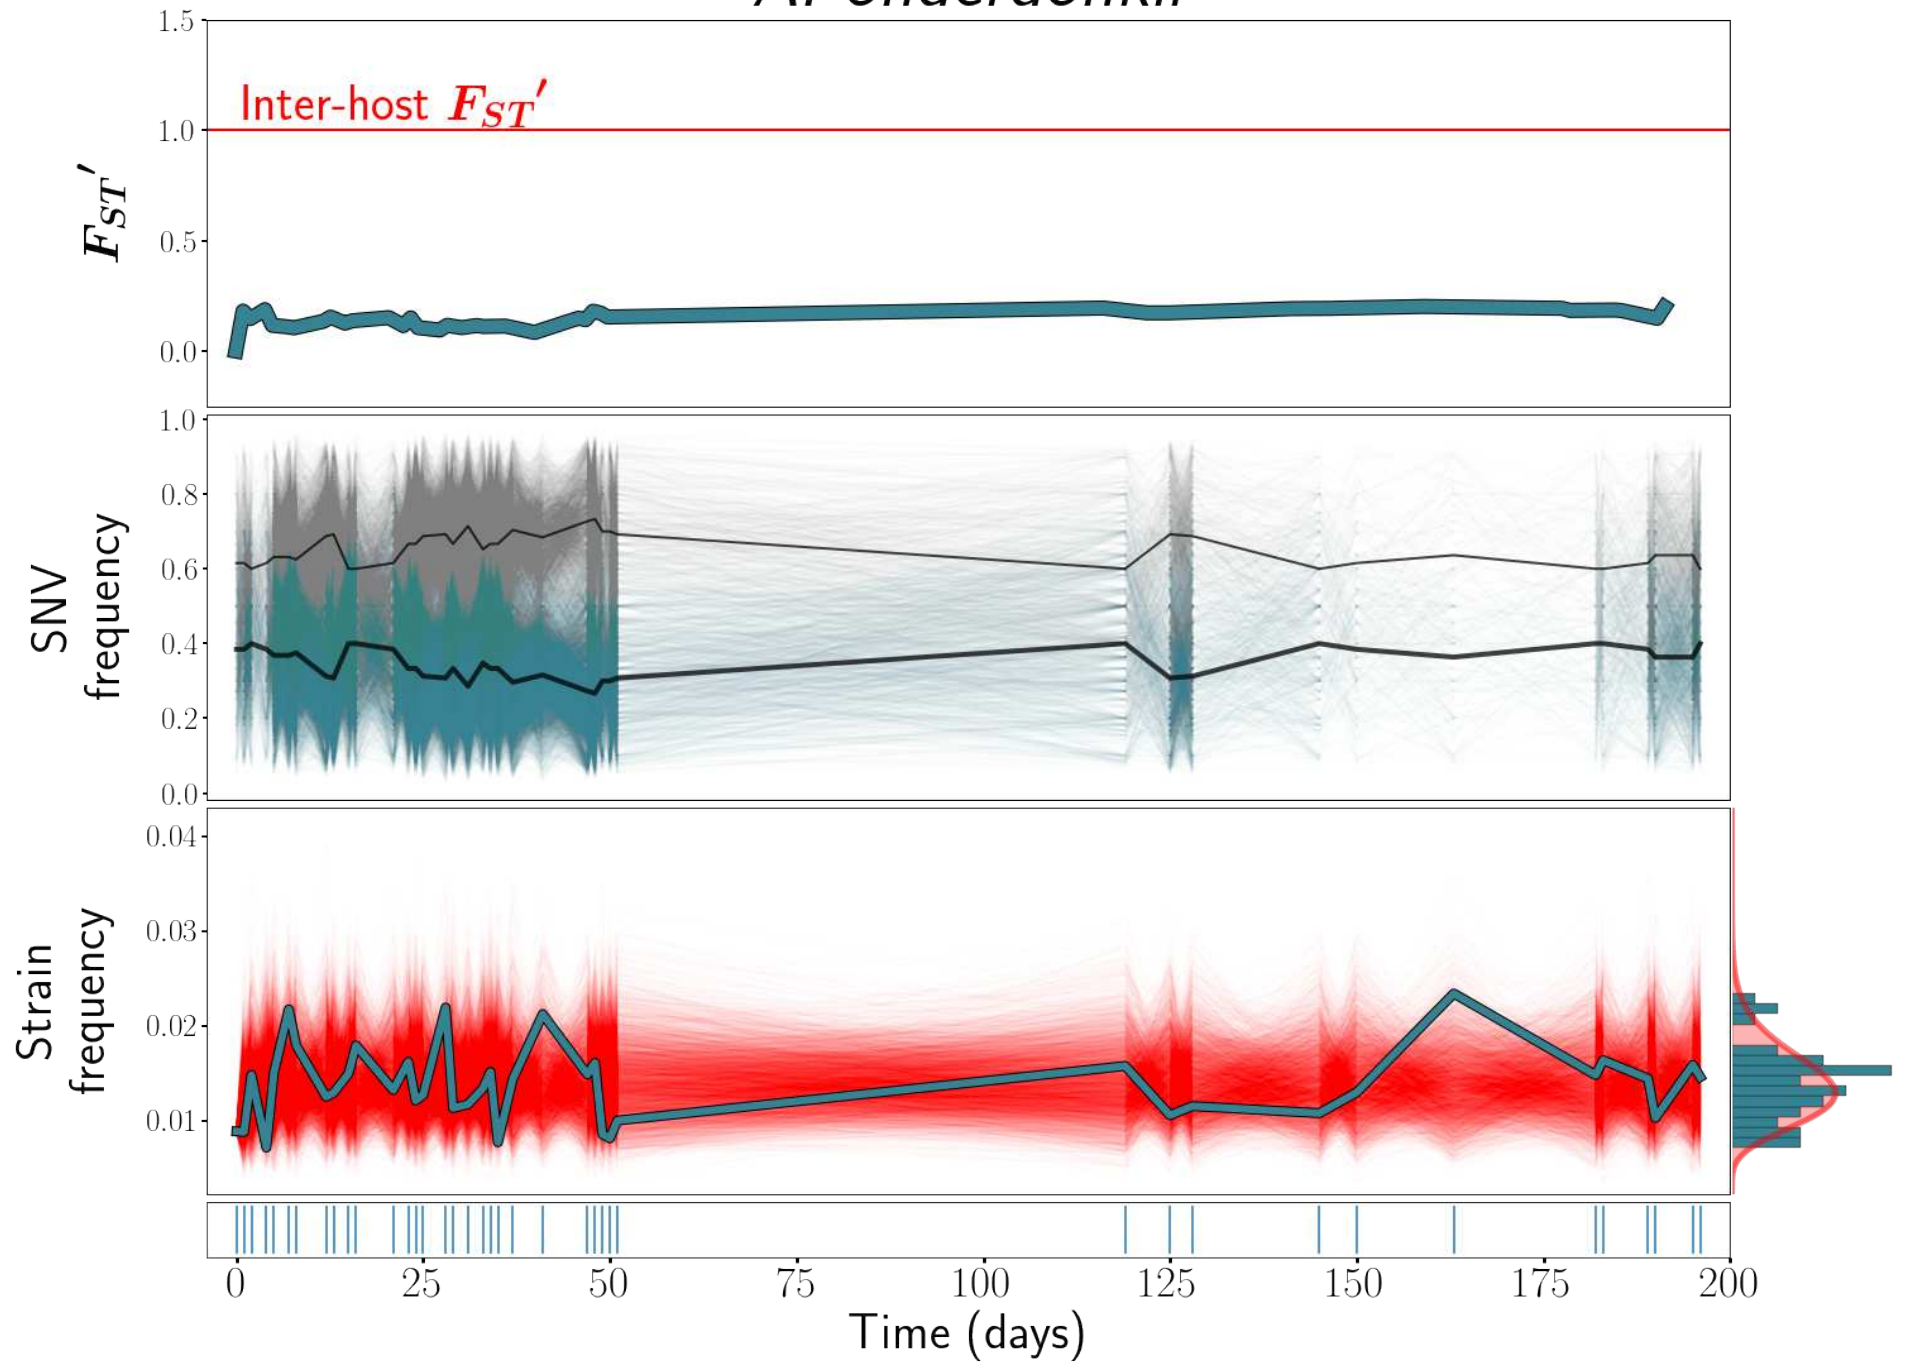

# *A. onderdonkii*

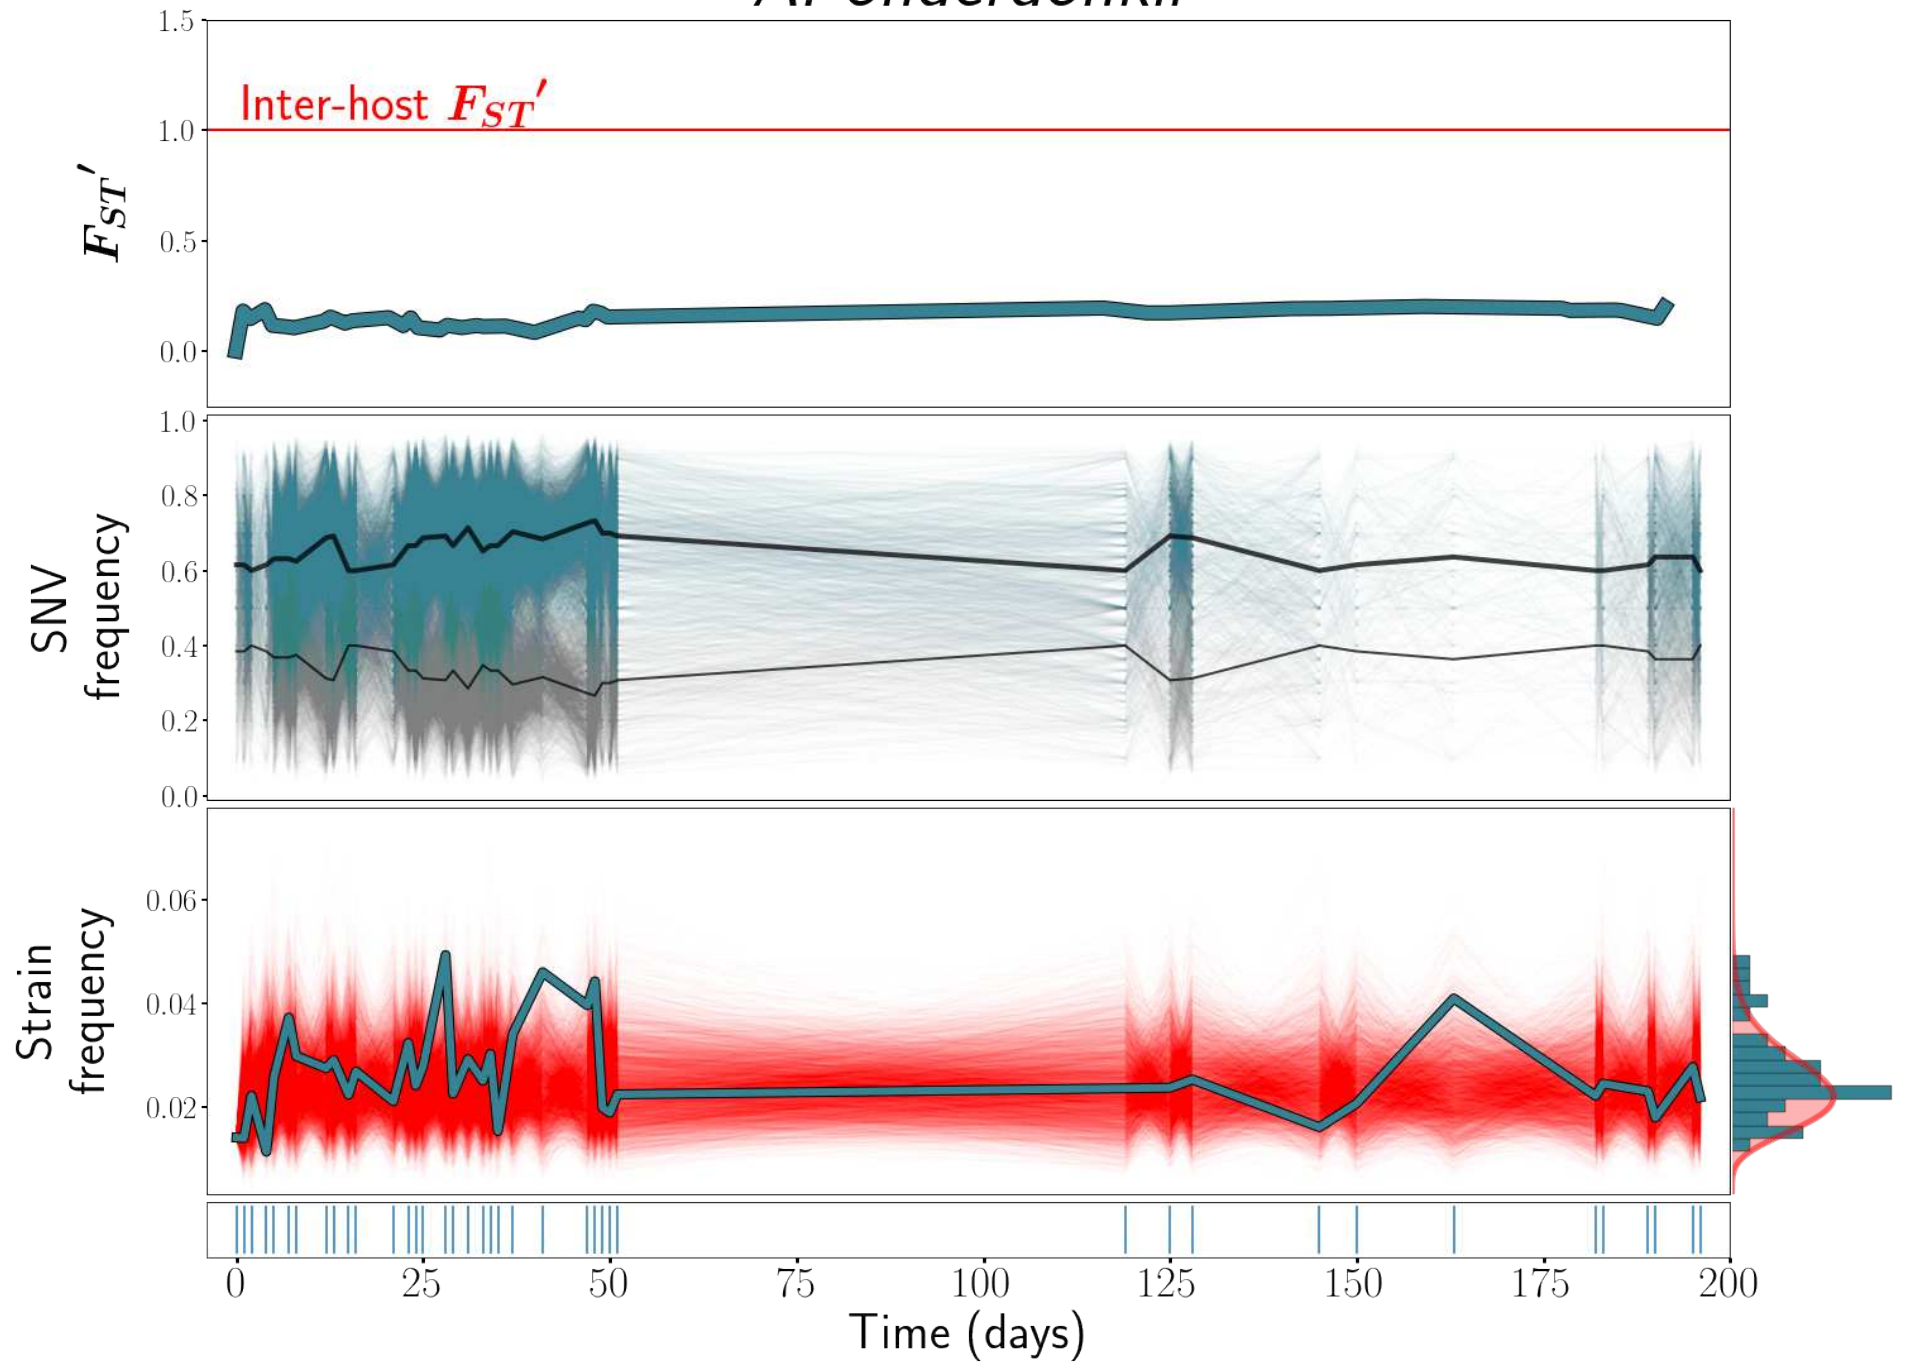

*A. putredinis*

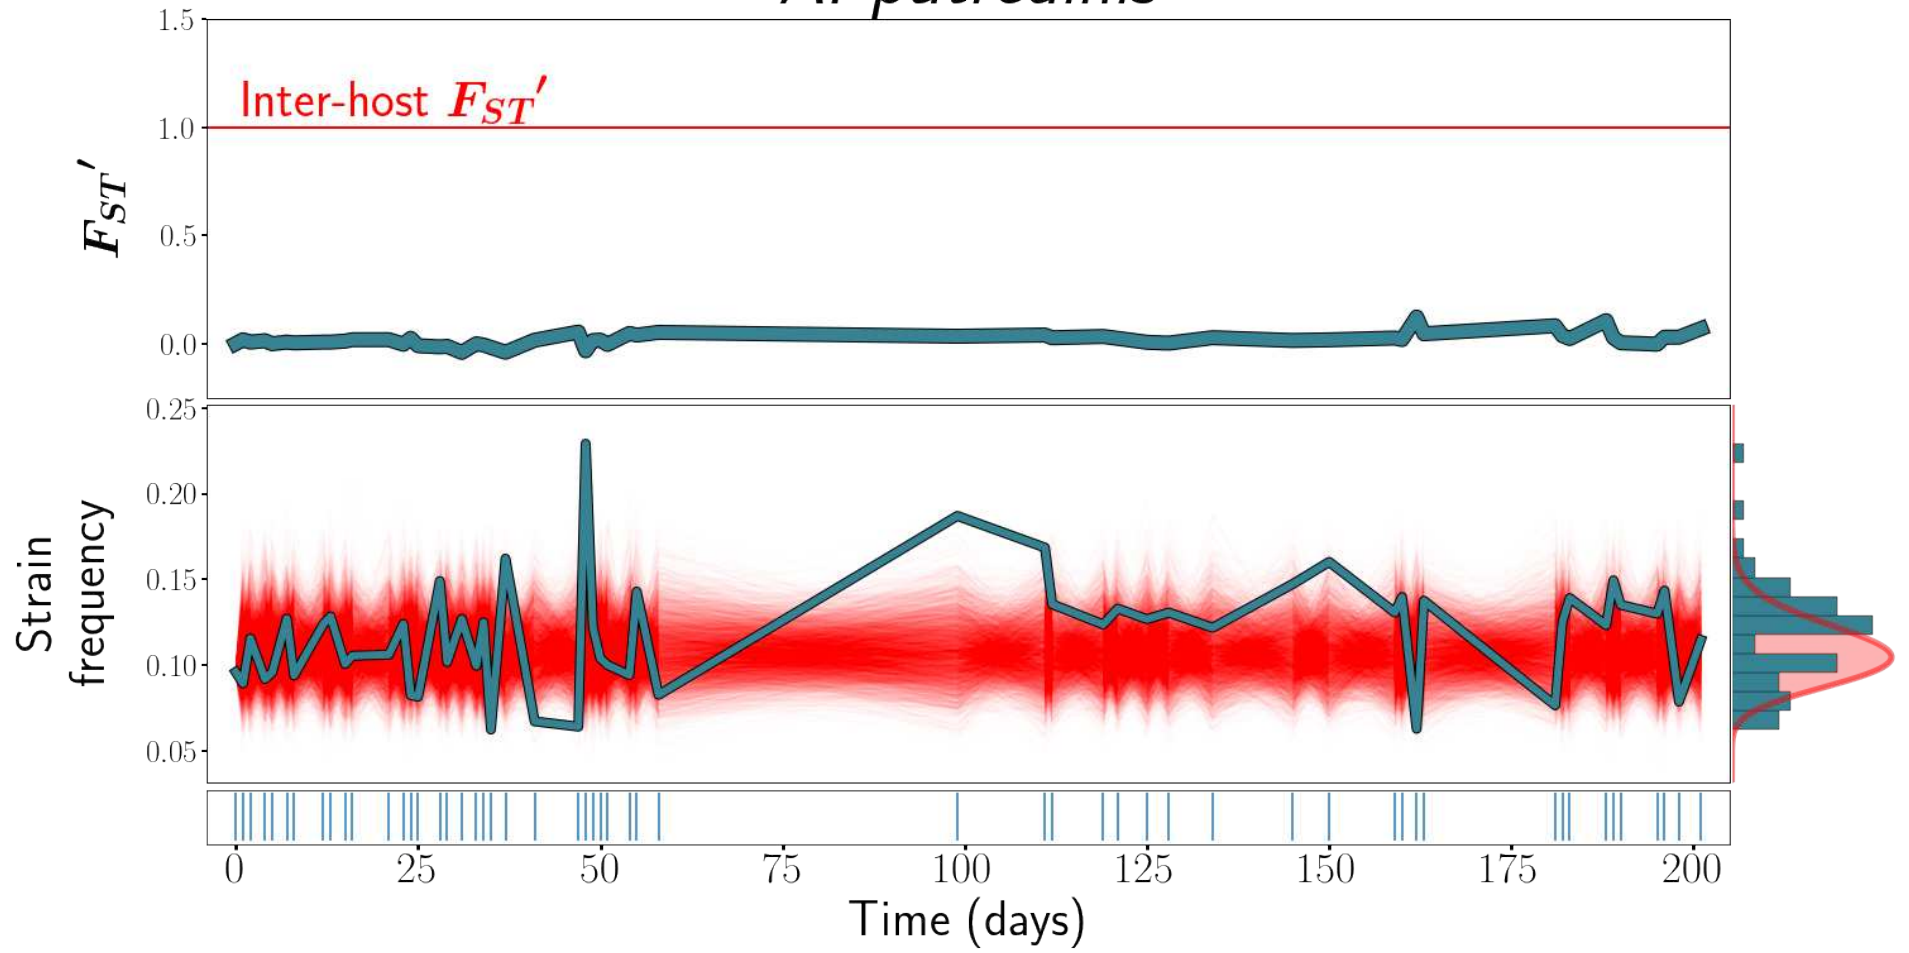

# *B. cellulosilyticus*

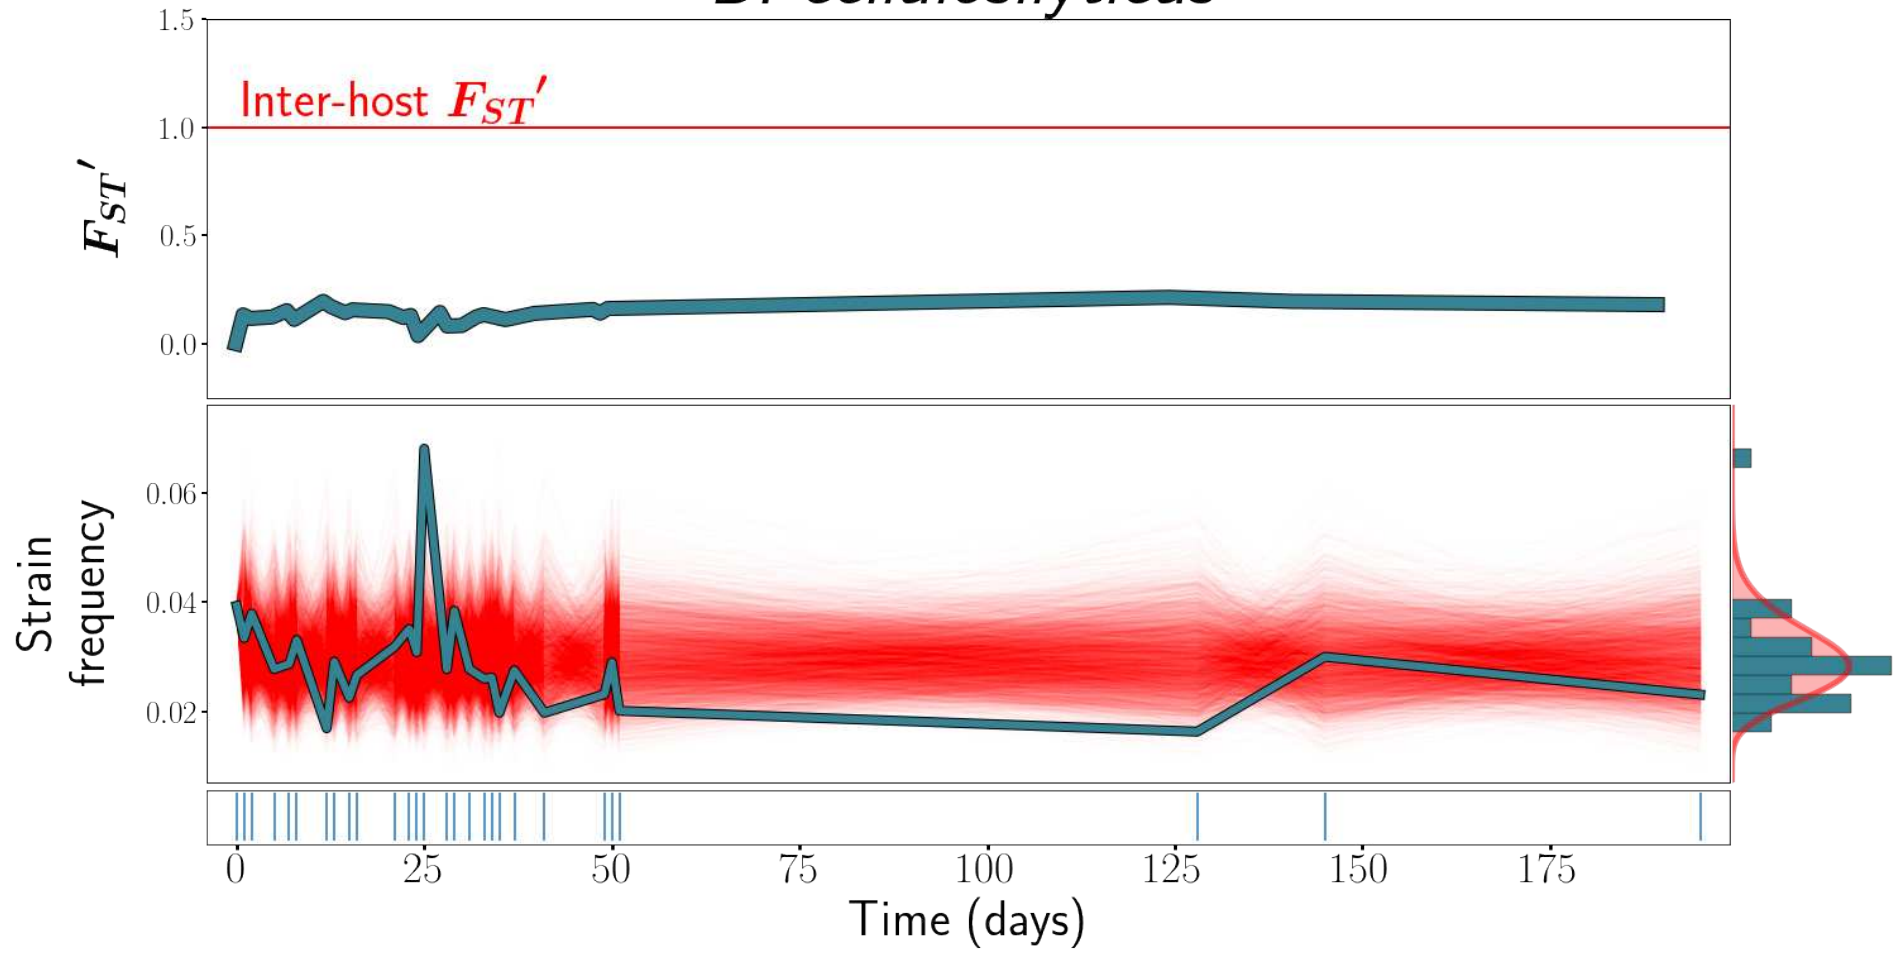

# *B. ovatus*

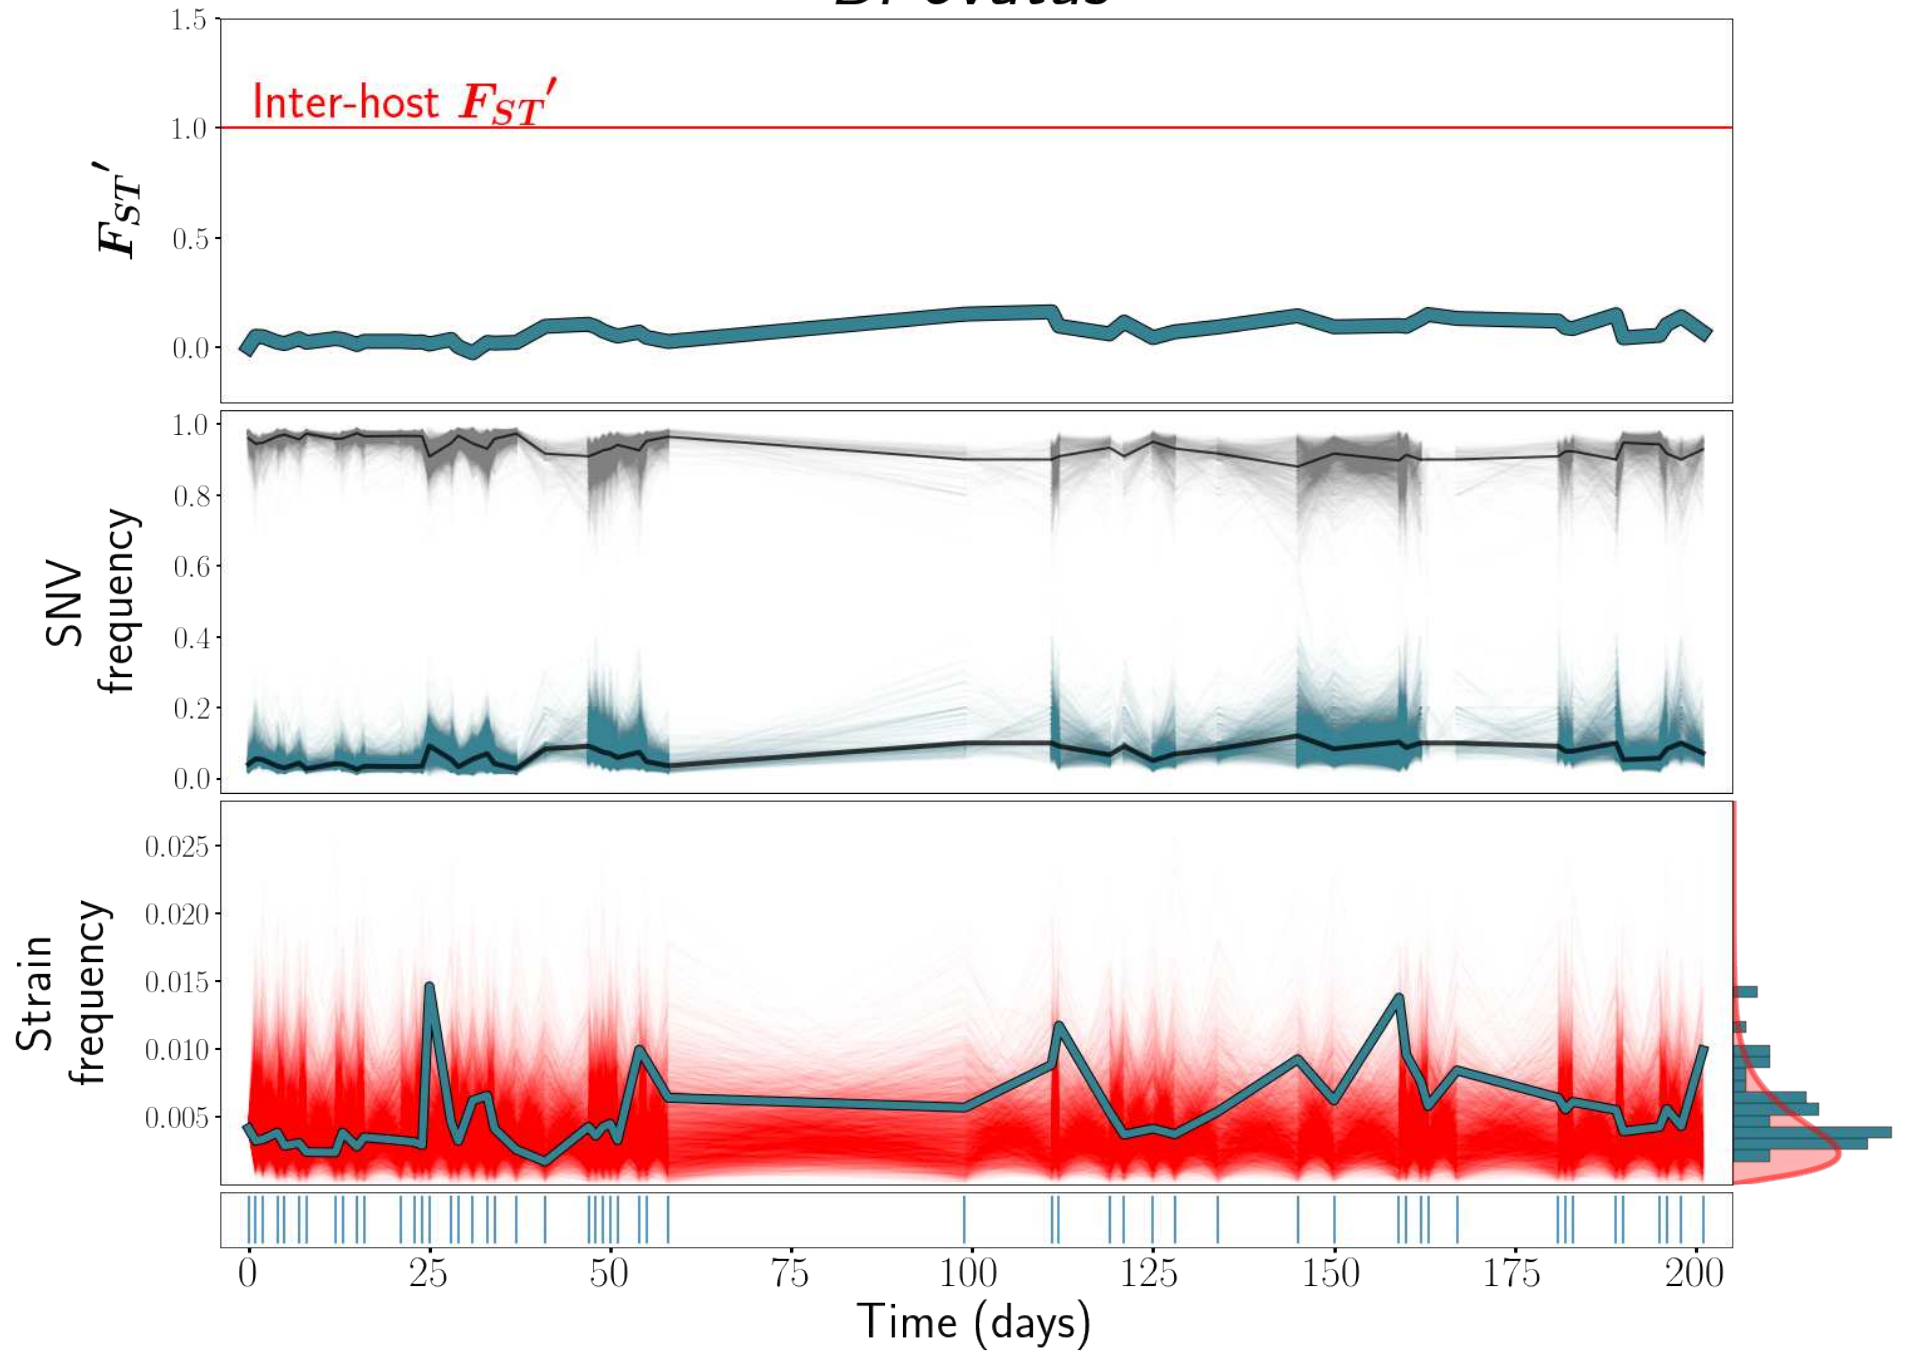

# *B. ovatus*

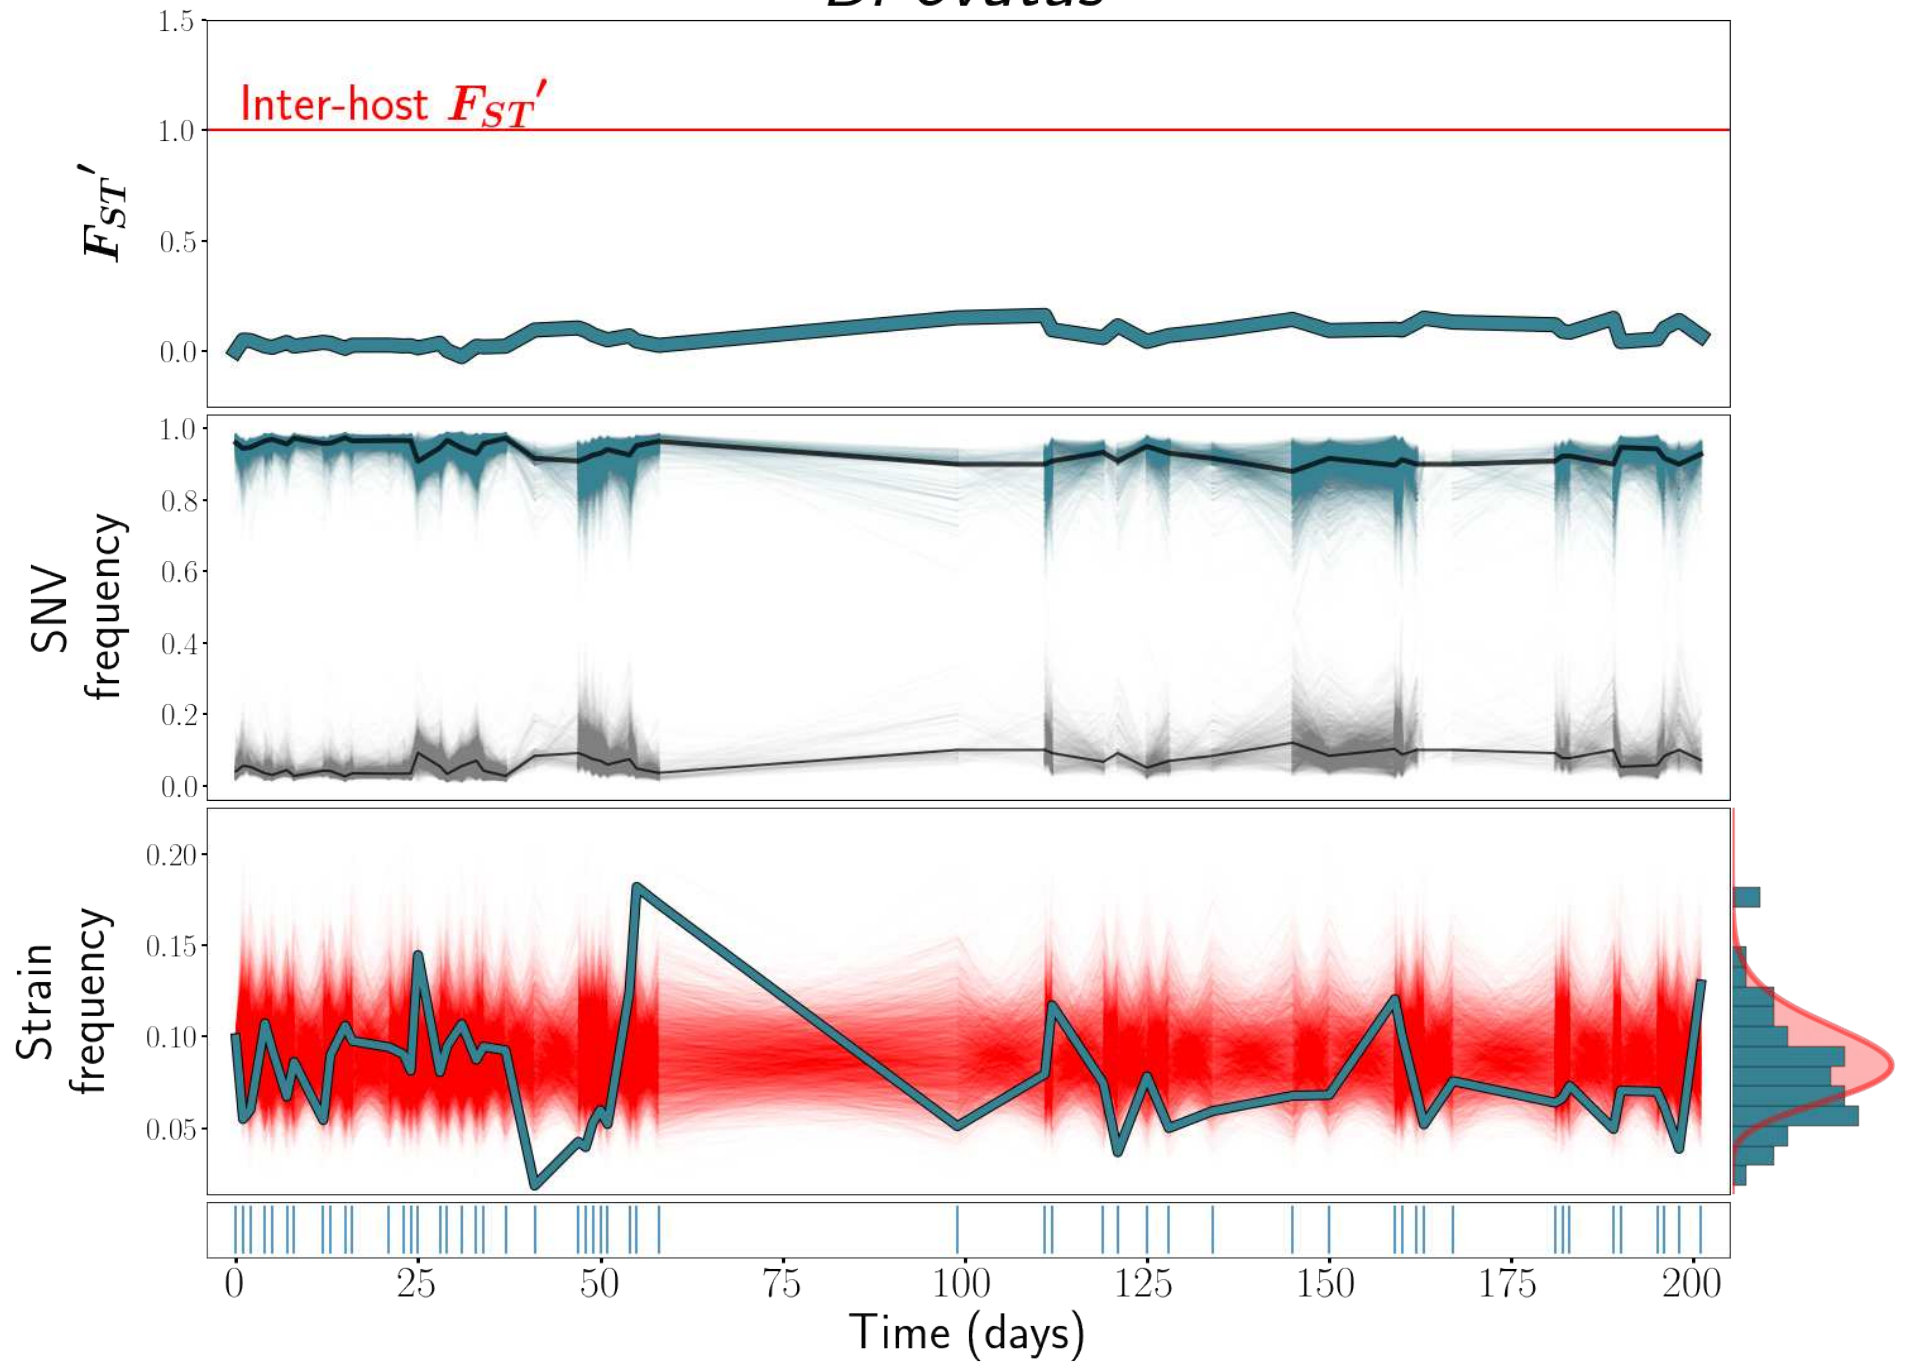

*B. thetaiotaomicron*

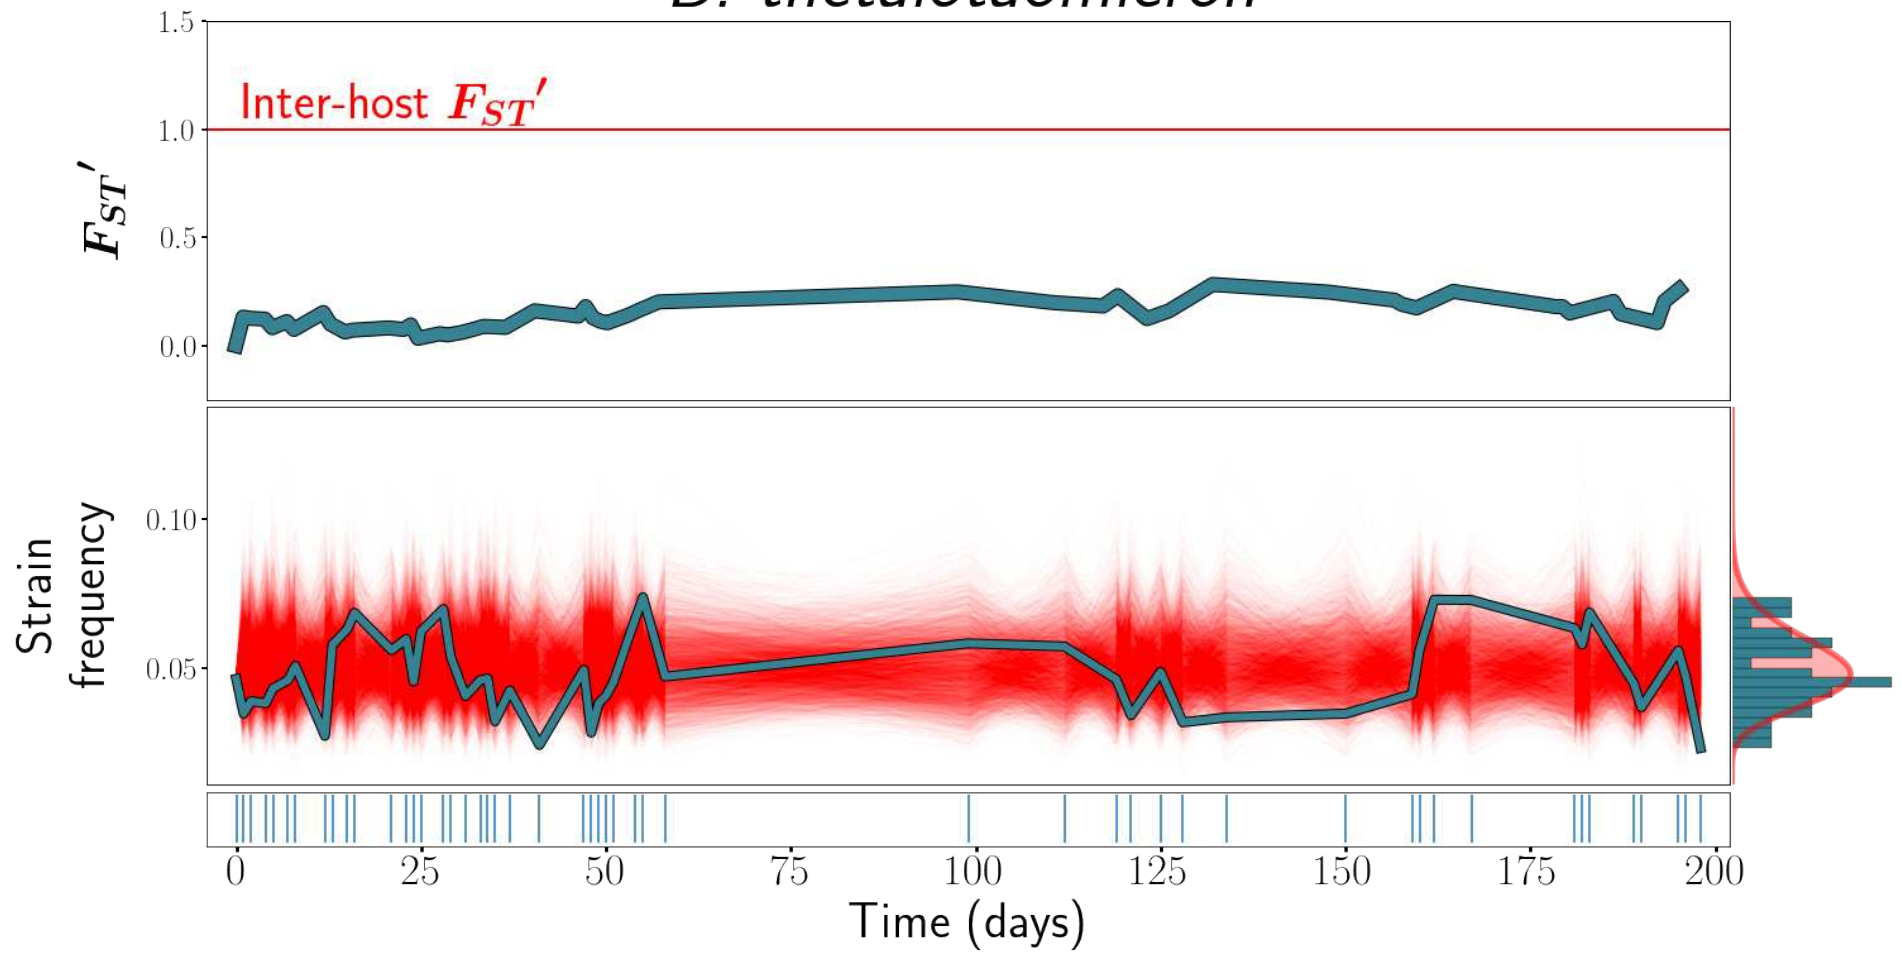



*B. uniformis*

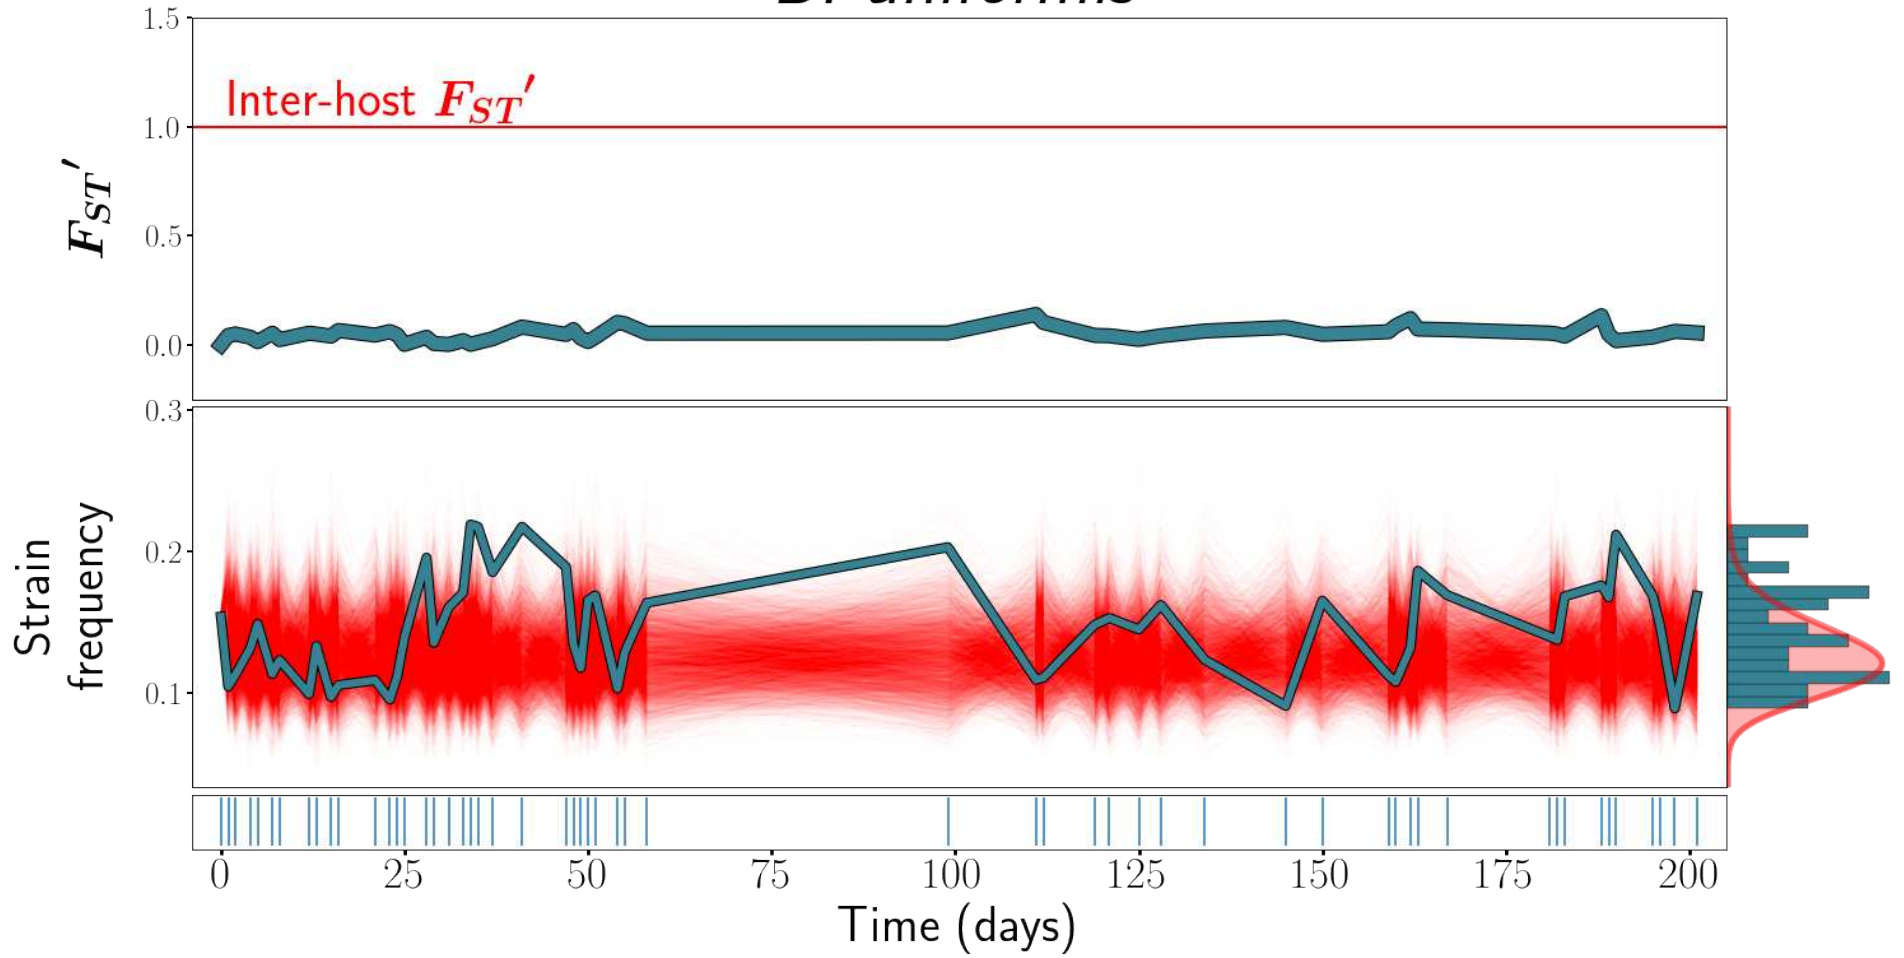

# *E. rectale*

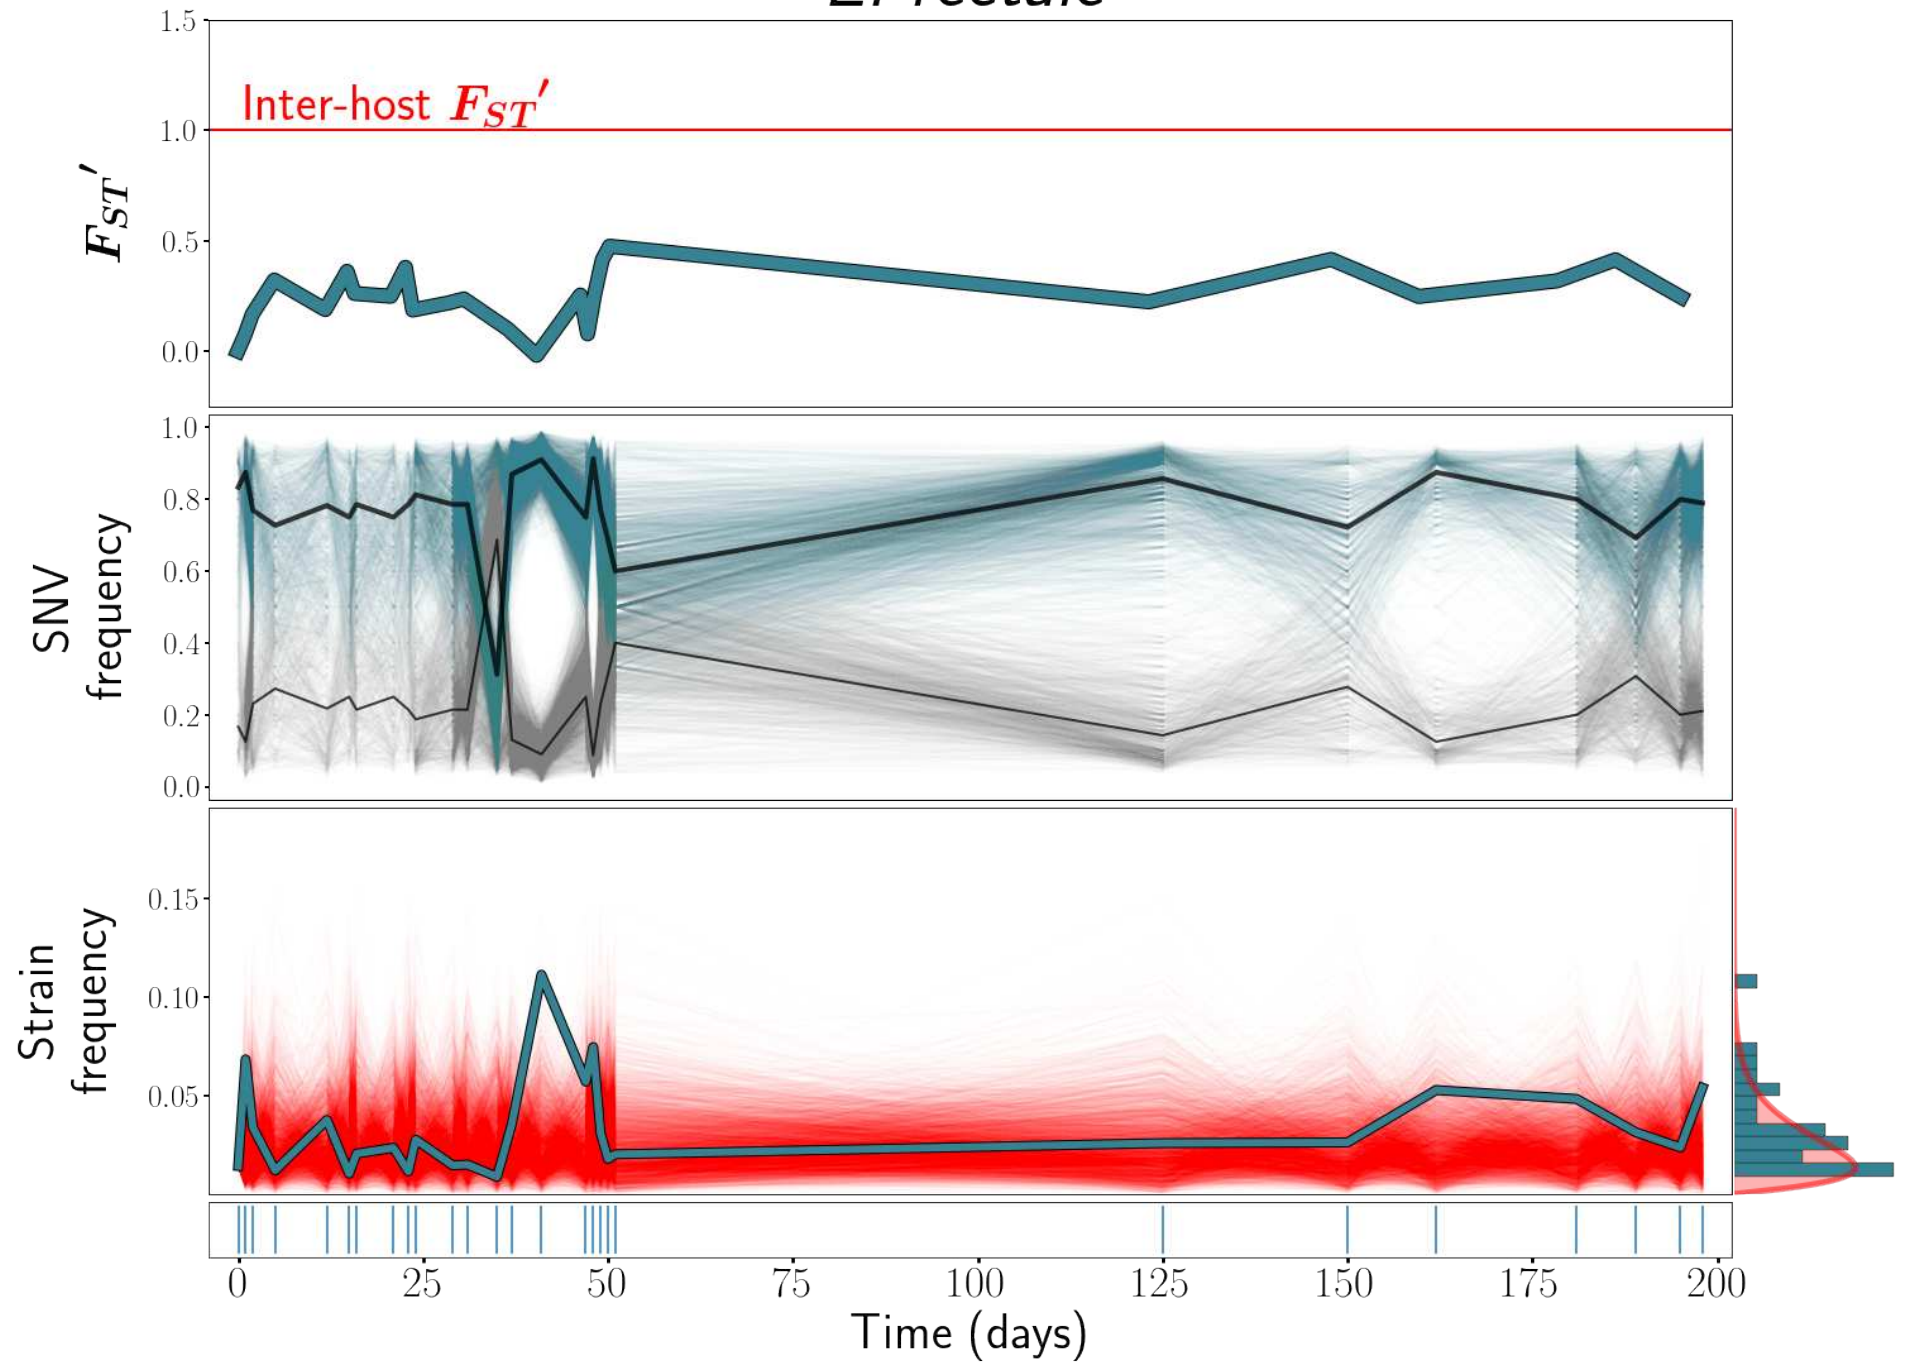

# *E. rectale*

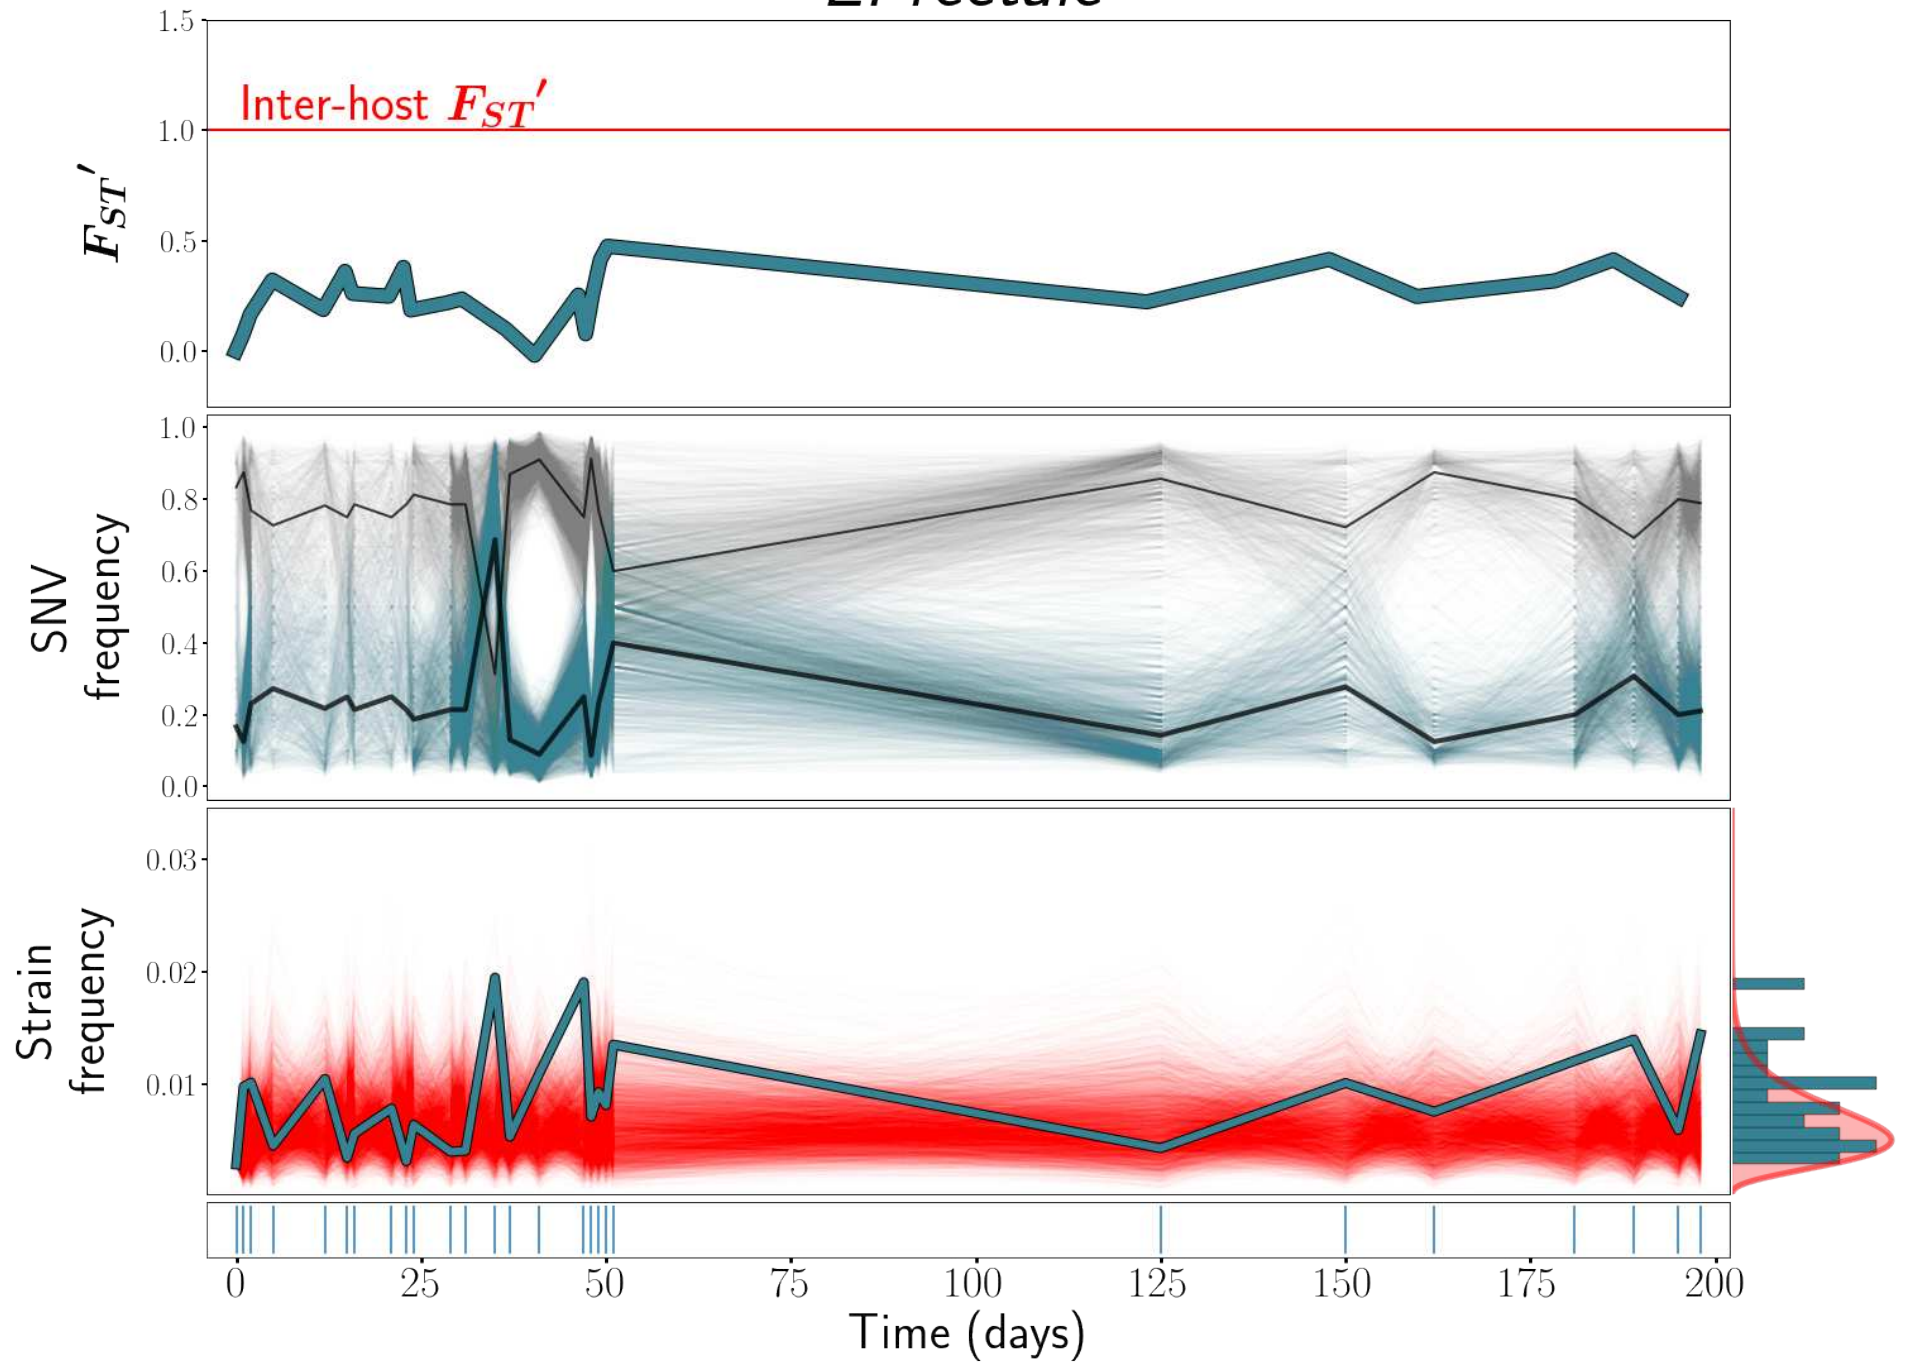

# *P. massiliensis*

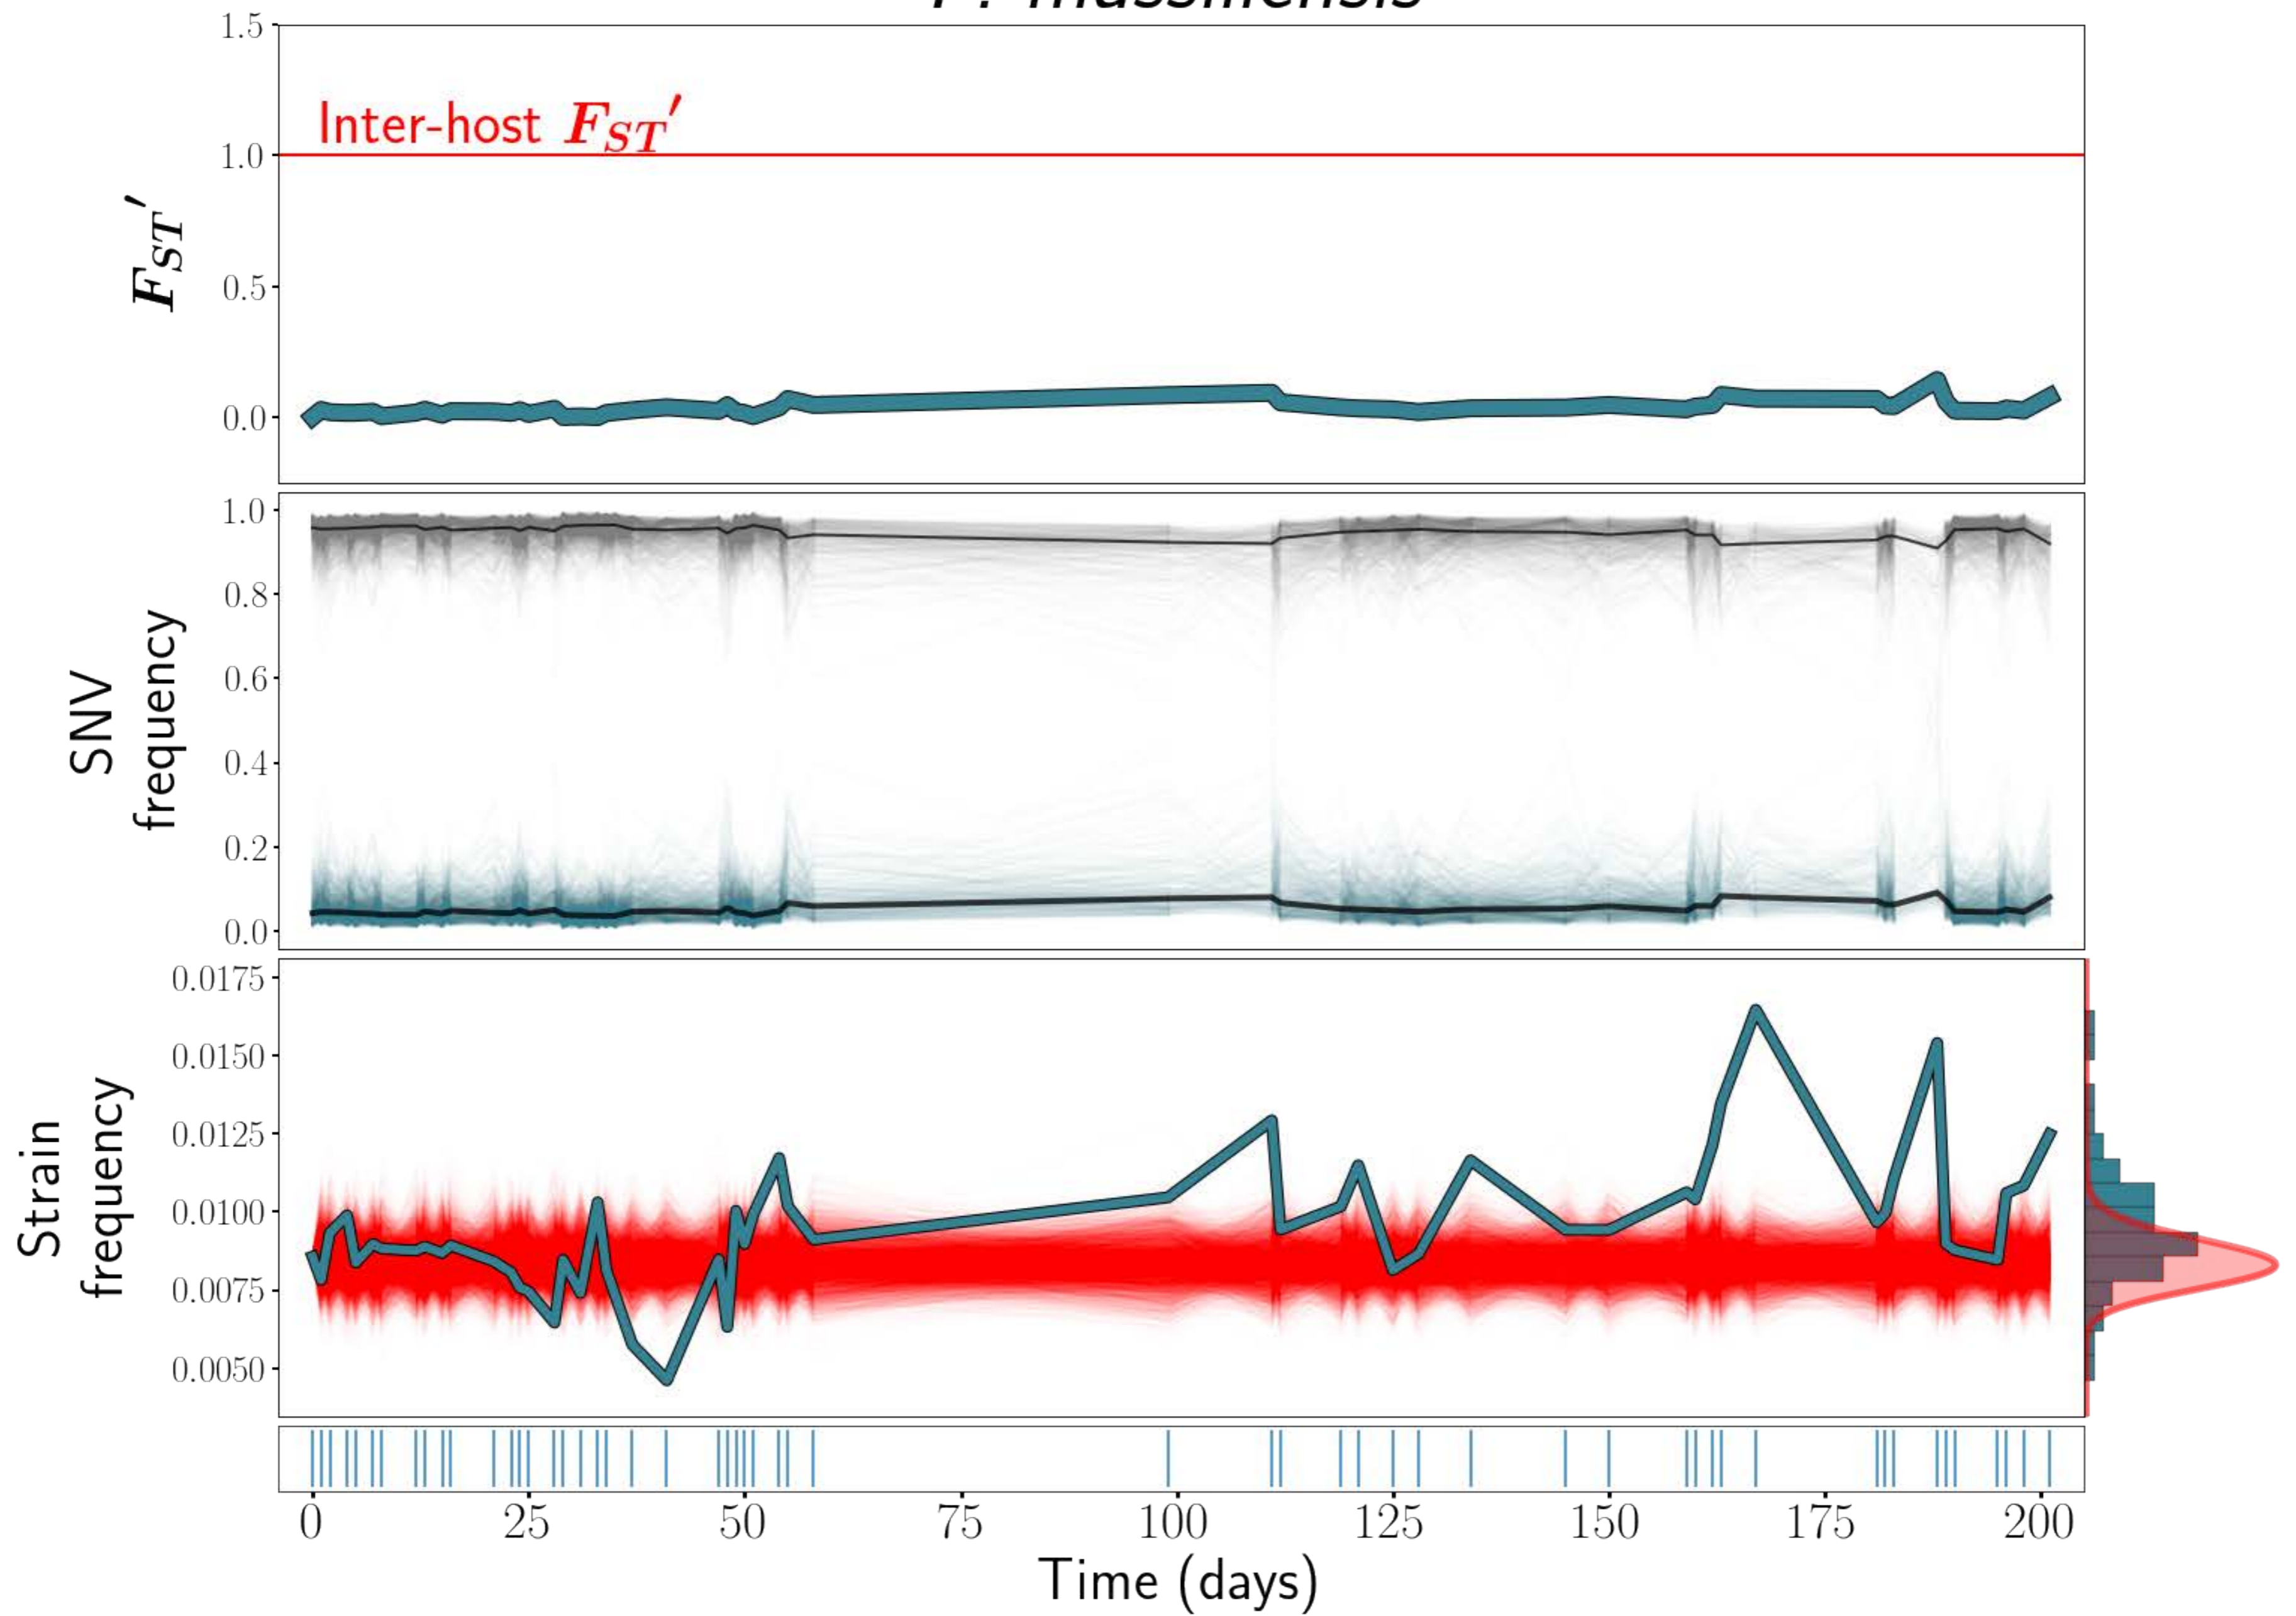

# *P. massiliensis*

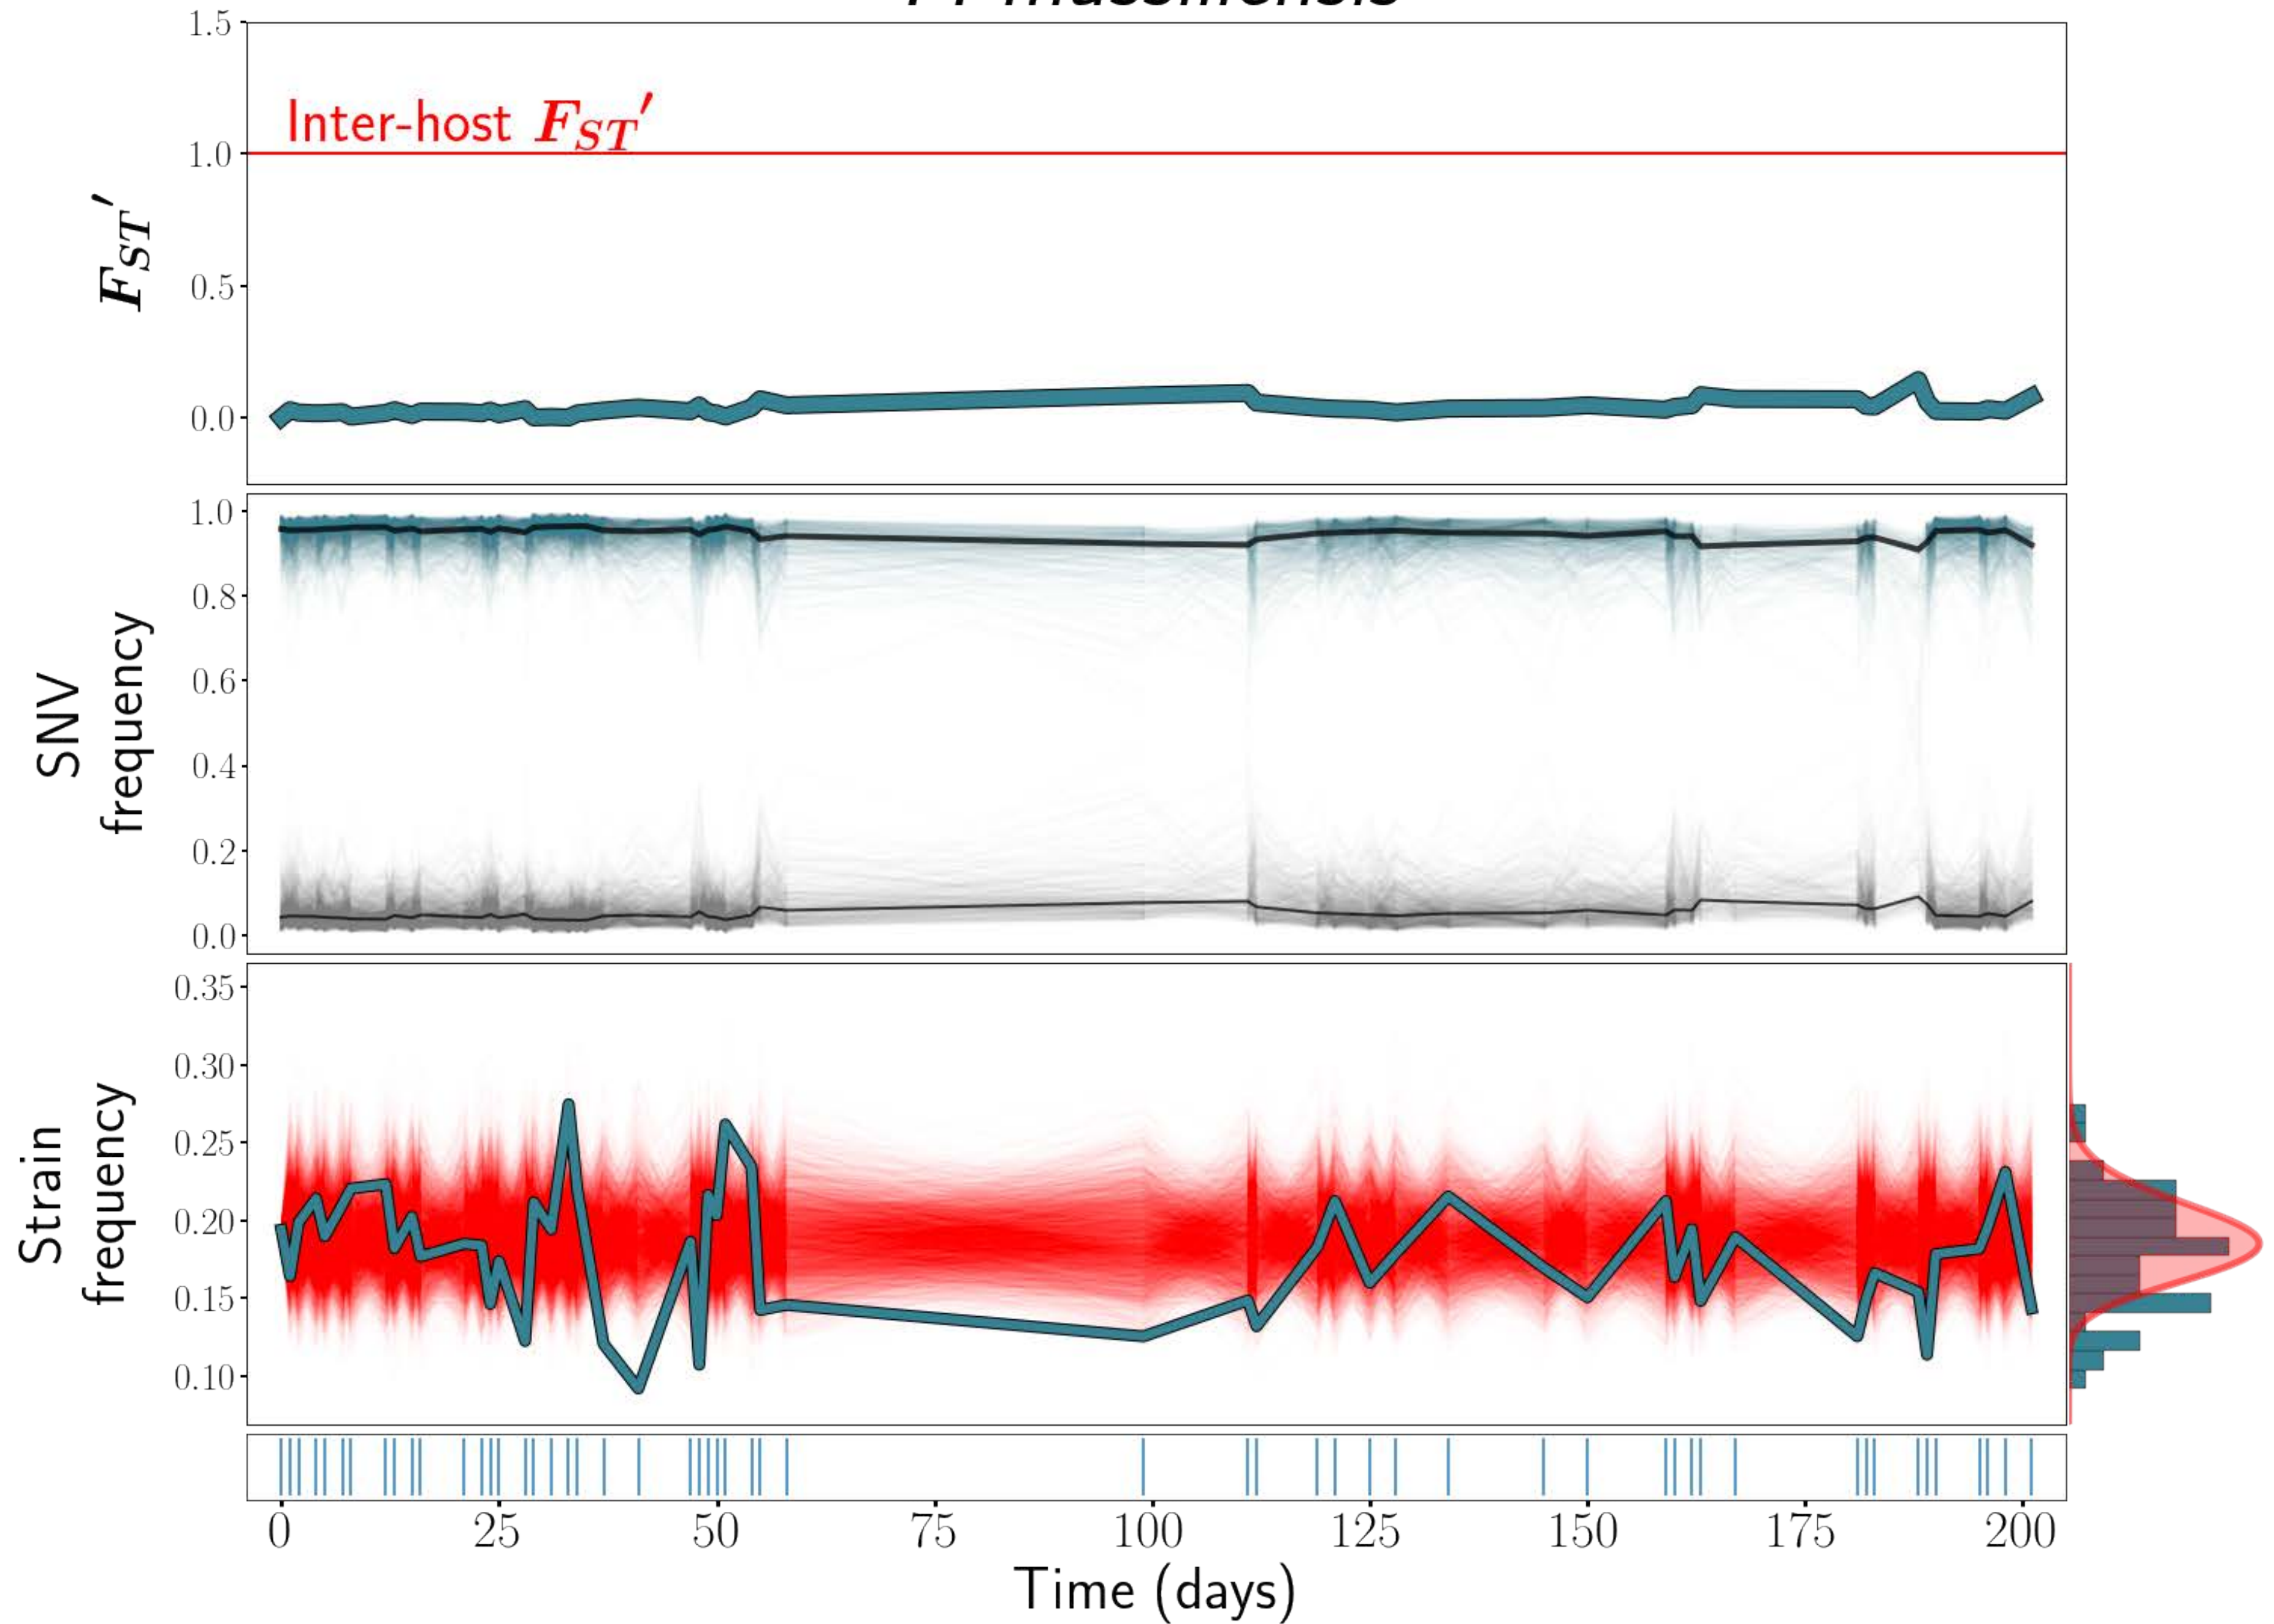

# *P. vulgatus*

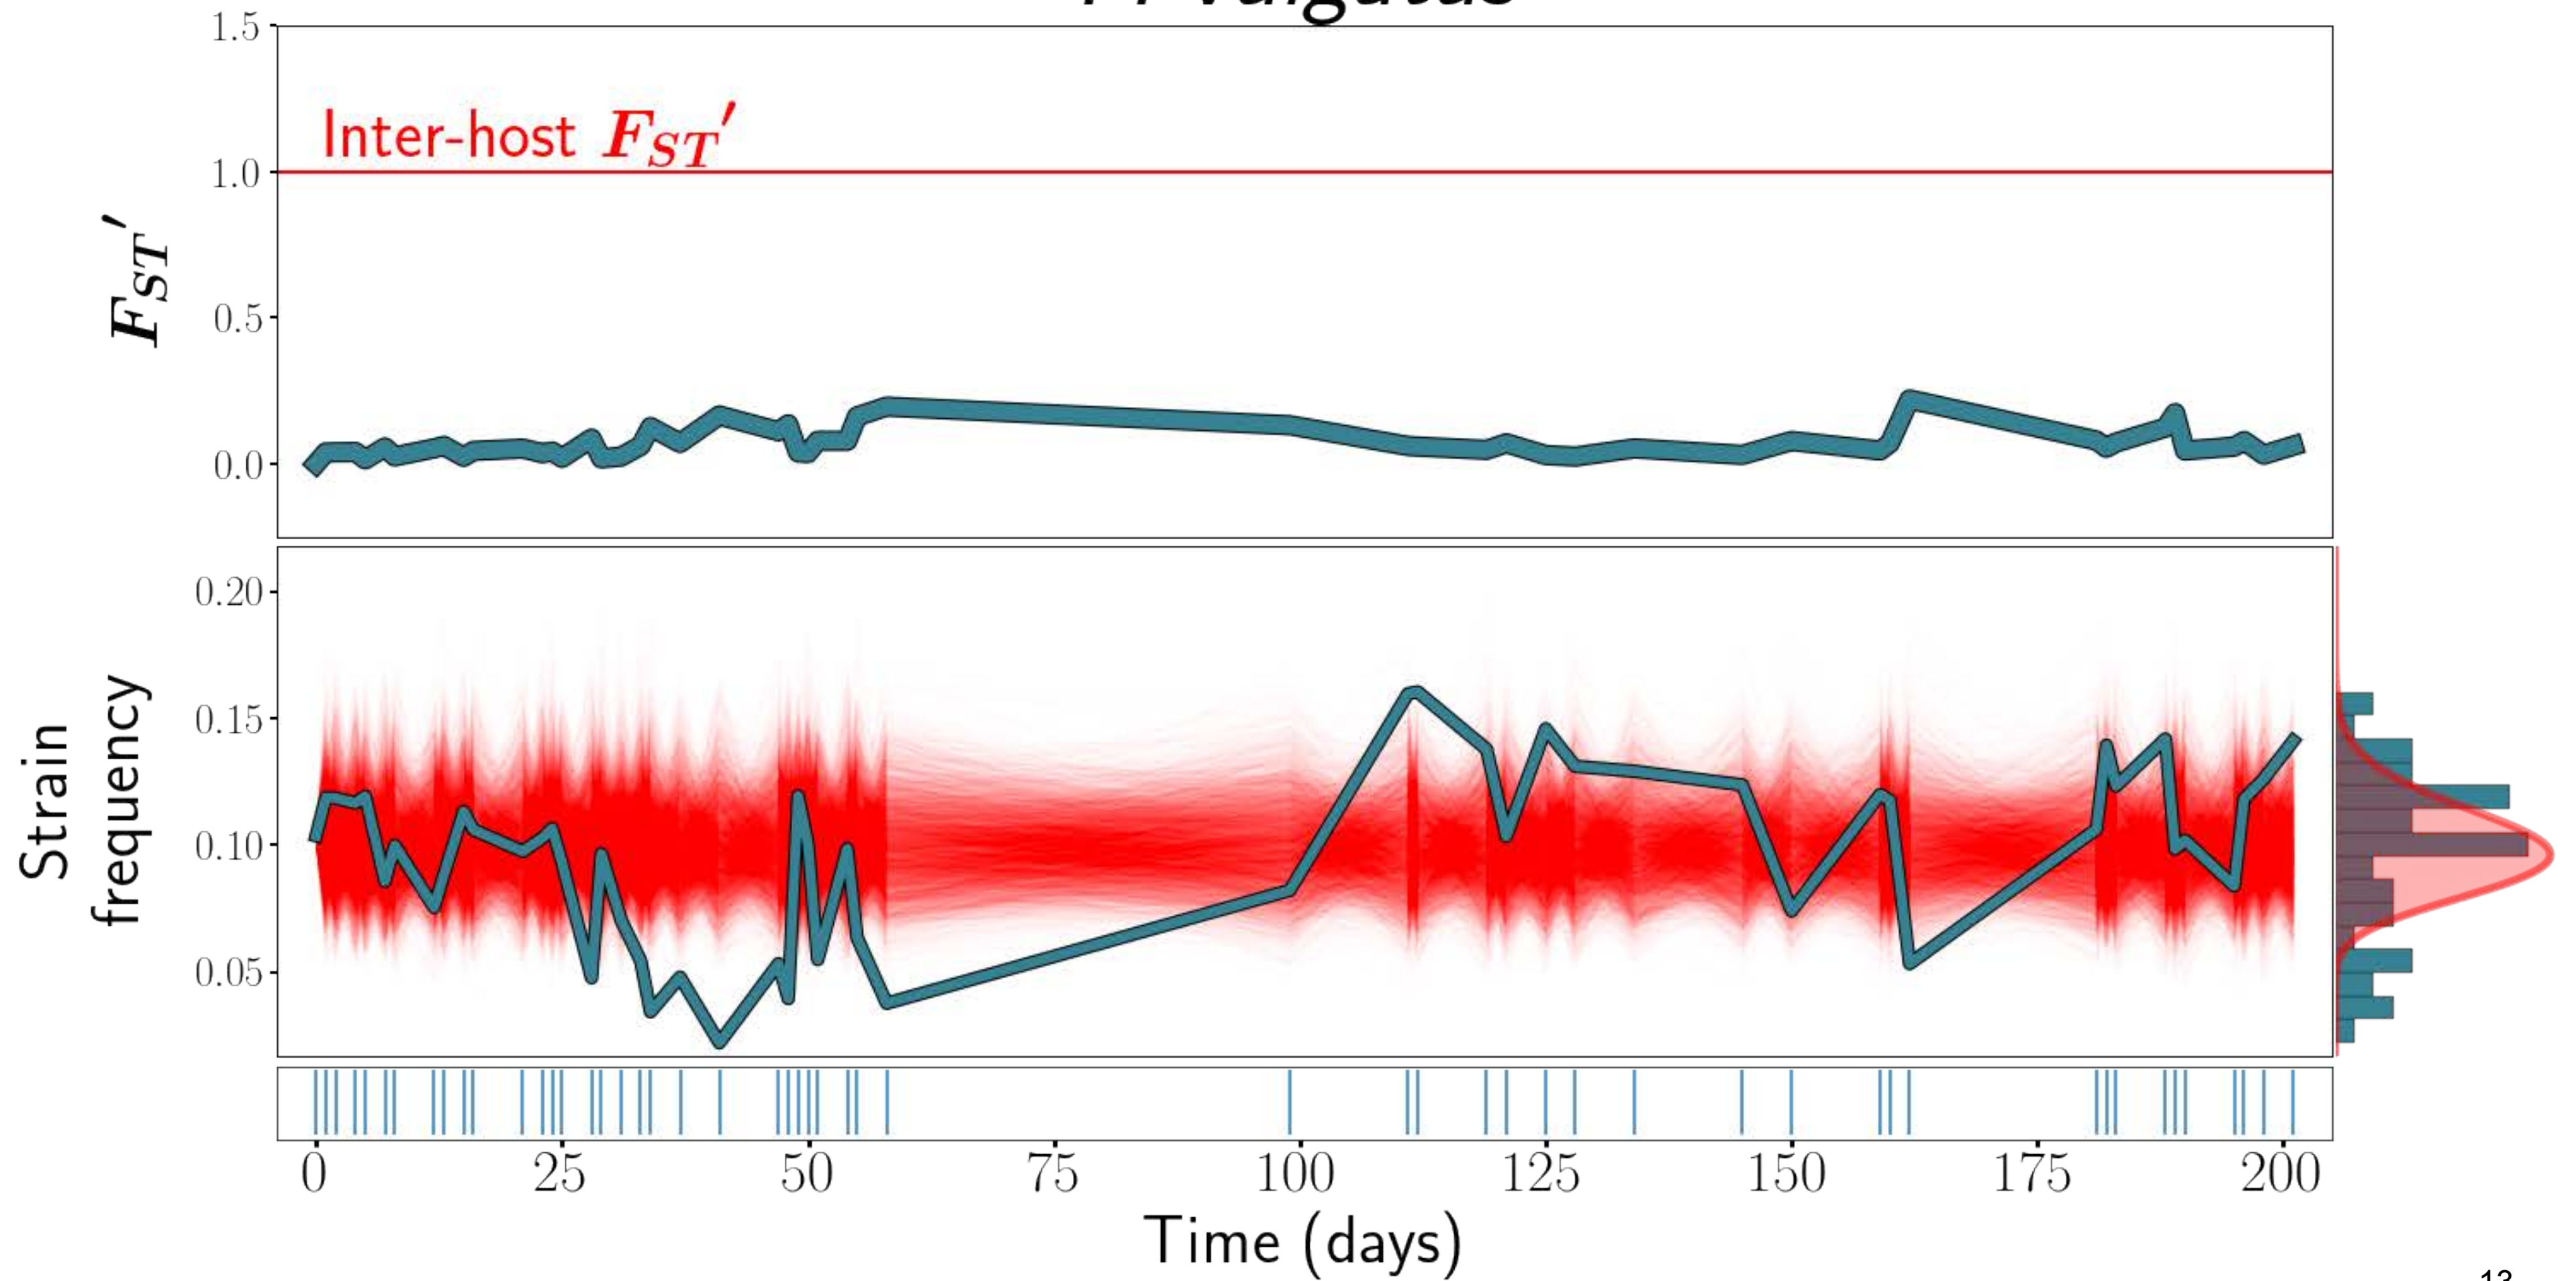

Supplement: mbio.02502-22-s0005.pdf [file mbio.02502-22-s0005.pdf]
